# Supplementary material for: The influence of a short-term gluten-free diet on the human gut microbiome
Source: PubMed Central journal article supplement (PMC4841035; doi:10.1186/s13073-016-0295-y), 2016-04-21
Supplement: 13073_2016_295_MOESM8_ESM.pdf [file 13073_2016_295_MOESM8_ESM.pdf]

| Taxa                                                                                                                    | Fecal_Biomarker         | Cor(rho)     | P-val    | Q-val       |
|-------------------------------------------------------------------------------------------------------------------------|-------------------------|--------------|----------|-------------|
| k__Bacteria p__Tenericutes c__RF3 o__ML615J-28                                                                          | Chromogranin.A..nmol.g. | -0.58457262  | 6.17E-15 | 2.19E-12    |
| k__Bacteria p__Proteobacteria c__Betaproteobacteria o__Burkholderiales f__Oxalobacteraceae g__Oxalobacter s__formigenes | Chromogranin.A..nmol.g. | -0.554156724 | 2.74E-13 | 4.88E-11    |
| k__Bacteria p__Firmicutes c__Clostridia o__Clostridiales f__Lachnospiraceae                                             | Chromogranin.A..nmol.g. | 0.514693661  | 2.20E-11 | 2.61E-09    |
| k__Bacteria p__Firmicutes c__Clostridia o__Clostridiales f__Christensenellaceae                                         | Chromogranin.A..nmol.g. | -0.498058166 | 1.19E-10 | 9.30E-09    |
| k__Bacteria p__Tenericutes                                                                                              | Chromogranin.A..nmol.g. | -0.497070916 | 1.31E-10 | 9.30E-09    |
| k__Bacteria p__Firmicutes c__Clostridia                                                                                 | Valerat...mol.g.        | -0.466712823 | 2.55E-09 | 1.29E-07    |
| k__Bacteria p__Firmicutes c__Clostridia o__Clostridiales                                                                | Valerat...mol.g.        | -0.467056627 | 2.47E-09 | 1.29E-07    |
| k__Bacteria p__Firmicutes                                                                                               | Propionat...mol.g.      | -0.463051517 | 3.52E-09 | 1.39E-07    |
| k__Bacteria p__Firmicutes c__Clostridia o__Clostridiales f__Christensenellaceae                                         | Butyrat...mol.g.        | -0.463749335 | 3.31E-09 | 1.39E-07    |
| k__Bacteria p__Firmicutes c__Clostridia                                                                                 | Propionat...mol.g.      | -0.457405422 | 5.74E-09 | 1.92E-07    |
| k__Bacteria p__Firmicutes c__Clostridia o__Clostridiales                                                                | Propionat...mol.g.      | -0.457003074 | 5.94E-09 | 1.92E-07    |
| k__Bacteria p__Firmicutes                                                                                               | Valerat...mol.g.        | -0.455701631 | 6.64E-09 | 1.97E-07    |
| k__Bacteria p__Tenericutes c__Mollicutes                                                                                | Chromogranin.A..nmol.g. | -0.449559895 | 9.94E-09 | 2.72E-07    |
| k__Bacteria p__Tenericutes c__Mollicutes o__RF39                                                                        | Chromogranin.A..nmol.g. | -0.448651232 | 1.07E-08 | 2.72E-07    |
| k__Bacteria p__Bacteroidetes c__Bacteroidia o__Bacteroidales f__Barnesiellaceae                                         | Chromogranin.A..nmol.g. | -0.447129747 | 1.22E-08 | 2.89E-07    |
| k__Bacteria p__Bacteroidetes c__Bacteroidia o__Bacteroidales f__Prevotellaceae g__Prevotella                            | Caproat...mol.g.        | 0.436314443  | 3.31E-08 | 7.35E-07    |
| k__Bacteria p__Bacteroidetes c__Bacteroidia o__Bacteroidales                                                            | Propionat...mol.g.      | 0.432144392  | 4.61E-08 | 9.11E-07    |
| k__Bacteria p__Bacteroidetes c__Bacteroidia o__Bacteroidales f__Prevotellaceae g__Prevotella                            | Valerat...mol.g.        | 0.432271363  | 4.57E-08 | 9.11E-07    |
| k__Bacteria p__Firmicutes c__Clostridia o__Clostridiales f__Christensenellaceae                                         | Propionat...mol.g.      | -0.425141258 | 7.99E-08 | 1.49E-06    |
| k__Bacteria p__Bacteroidetes c__Bacteroidia o__Bacteroidales f__S24-7                                                   | Chromogranin.A..nmol.g. | -0.419289581 | 1.13E-07 | 2.01E-06    |
| k__Bacteria p__Bacteroidetes c__Bacteroidia o__Bacteroidales f__Odoribacteraceae g__Butyricimonas                       | Caproat...mol.g.        | 0.411558139  | 2.24E-07 | 3.78E-06    |
| k__Bacteria p__Firmicutes c__Clostridia o__Clostridiales f__Lachnospiraceae                                             | Valerat...mol.g.        | -0.40796191  | 2.91E-07 | 4.71E-06    |
| k__Bacteria p__Firmicutes c__Clostridia o__Clostridiales f__Ruminococcaceae g__Faecalibacterium s__prausnitzii          | Caproat...mol.g.        | -0.405265259 | 3.55E-07 | 5.48E-06    |
| k__Bacteria p__Firmicutes c__Clostridia o__Clostridiales f__Christensenellaceae                                         | Acetat...mol.g.         | -0.404176961 | 3.84E-07 | 5.68E-06    |
| k__Bacteria p__Proteobacteria c__Alphaproteobacteria o__RF32                                                            | Chromogranin.A..nmol.g. | -0.395994676 | 6.30E-07 | 8.95E-06    |
| k__Bacteria p__Bacteroidetes c__Bacteroidia o__Bacteroidales f__Odoribacteraceae g__Butyricimonas                       | Chromogranin.A..nmol.g. | -0.394272118 | 7.11E-07 | 9.72E-06    |
| k__Bacteria p__Bacteroidetes c__Bacteroidia o__Bacteroidales                                                            | Valerat...mol.g.        | 0.39192966   | 9.15E-07 | 1.20E-05    |
| k__Bacteria p__Bacteroidetes c__Bacteroidia o__Bacteroidales f__Prevotellaceae g__Prevotella s__copri                   | Caproat...mol.g.        | 0.39043408   | 1.01E-06 | 1.29E-05    |
| k__Bacteria p__Bacteroidetes c__Bacteroidia o__Bacteroidales f__S24-7                                                   | Calprotectin...g.g.     | -0.387015125 | 1.18E-06 | 1.45E-05    |
| k__Bacteria p__Bacteroidetes c__Bacteroidia o__Bacteroidales f__[Bacteroidaceae/Rikenellaceae]                          | Caproat...mol.g.        | 0.384274798  | 1.55E-06 | 1.83E-05    |
| k__Bacteria p__Firmicutes c__Clostridia o__Clostridiales f__Lachnospiraceae g__Roseburia                                | Chromogranin.A..nmol.g. | 0.382009099  | 1.66E-06 | 1.90E-05    |
| k__Bacteria p__Firmicutes c__Clostridia o__Clostridiales f__Clostridiaceae g__Clostridium                               | Chromogranin.A..nmol.g. | 0.375309125  | 2.60E-06 | 2.84E-05    |
| k__Bacteria p__Firmicutes c__Clostridia o__Clostridiales f__Veillonellaceae                                             | Propionat...mol.g.      | 0.376284137  | 2.64E-06 | 2.84E-05    |
| k__Bacteria p__Firmicutes c__Clostridia o__Clostridiales f__Veillonellaceae                                             | Acetat...mol.g.         | 0.366750378  | 4.90E-06 | 5.13E-05    |
| k__Bacteria p__Firmicutes c__Clostridia o__Clostridiales f__Ruminococcaceae                                             | Propionat...mol.g.      | -0.366053543 | 5.13E-06 | 5.21E-05    |
| k__Bacteria p__Firmicutes c__Clostridia o__Clostridiales f__Veillonellaceae g__Acidaminococcus                          | Calprotectin...g.g.     | 0.362521918  | 5.96E-06 | 5.88E-05    |
| k__Bacteria p__Firmicutes c__Clostridia o__Clostridiales f__Lachnospiraceae g__Coprococcus                              | Chromogranin.A..nmol.g. | -0.360132946 | 6.93E-06 | 6.66E-05    |
| k__Bacteria p__Bacteroidetes c__Bacteroidia o__Bacteroidales f__Prevotellaceae g__Prevotella s__copri                   | Valerat...mol.g.        | 0.357166552  | 8.96E-06 | 8.38E-05    |
| k__Bacteria p__Firmicutes c__Clostridia o__Clostridiales f__Lachnospiraceae g__Roseburia                                | Valerat...mol.g.        | -0.354948519 | 1.03E-05 | 9.36E-05    |
| k__Bacteria p__Firmicutes c__Clostridia o__Clostridiales f__Lachnospiraceae                                             | Caproat...mol.g.        | -0.351817725 | 1.24E-05 | 0.000110551 |
| k__Bacteria p__Firmicutes c__Bacilli o__Lactobacillales                                                                 | Butyrat...mol.g.        | 0.350448326  | 1.35E-05 | 0.000117197 |
| k__Archaea p__Euryarchaeota c__Methanobacteria o__Methanobacteriales f__Methanobacteriaceae g__Methanobrevibacter       | Chromogranin.A..nmol.g. | -0.346716935 | 1.58E-05 | 0.000130772 |
| k__Bacteria                                                                                                             | Chromogranin.A..nmol.g. | 0.346915308  | 1.56E-05 | 0.000130772 |
| k__Bacteria p__Bacteroidetes c__Bacteroidia o__Bacteroidales f__Prevotellaceae g__Prevotella                            | Propionat...mol.g.      | 0.346233382  | 1.74E-05 | 0.000140538 |

|                                                                                                                         |                         |              |             |             |
|-------------------------------------------------------------------------------------------------------------------------|-------------------------|--------------|-------------|-------------|
| k__Bacteria p__Bacteroidetes c__Bacteroidia o__Bacteroidales f__Barnesiellaceae                                         | Caproat...mol.g.        | 0.345874052  | 1.78E-05    | 0.000140538 |
| k__Bacteria p__Firmicutes c__Erysipelotrichi o__Erysipelotrichales f__Erysipelotrichaceae                               | Acetat...mol.g.         | -0.340031545 | 2.51E-05    | 0.000194067 |
| k__Bacteria p__Firmicutes c__Clostridia o__Clostridiales f__Ruminococcaceae g__Oscillospira                             | Butyrat...mol.g.        | -0.339012186 | 2.67E-05    | 0.00020157  |
| k__Bacteria p__Firmicutes c__Clostridia o__Clostridiales f__Veillonellaceae                                             | Butyrat...mol.g.        | 0.338046926  | 2.82E-05    | 0.000208758 |
| k__Bacteria p__Firmicutes c__Clostridia o__Clostridiales f__[Ruminococcaceae/Clostridiaceae]                            | Beta.Defensin.2..ng.g.  | -0.33610515  | 2.96E-05    | 0.000214812 |
| k__Bacteria p__Bacteroidetes c__Bacteroidia o__Bacteroidales f__Rikenellaceae                                           | Caproat...mol.g.        | 0.336199485  | 3.14E-05    | 0.000223004 |
| k__Bacteria p__Bacteroidetes c__Bacteroidia o__Bacteroidales f__Bacteroidaceae g__Bacteroides s__coprophilus            | Beta.Defensin.2..ng.g.  | 0.332058885  | 3.74E-05    | 0.00025432  |
| k__Bacteria p__Bacteroidetes c__Bacteroidia o__Bacteroidales f__Odoribacteraceae g__Butyricimonas                       | Beta.Defensin.2..ng.g.  | 0.3323298    | 3.68E-05    | 0.00025432  |
| k__Bacteria p__Lentisphaerae c__Lentisphaeria o__Victivallales f__Victivallaceae                                        | Calprotectin...g.g.     | -0.331810232 | 3.79E-05    | 0.00025432  |
| k__Bacteria p__Proteobacteria c__Betaproteobacteria o__Burkholderiales f__Oxalobacteraceae g__Oxalobacter s__formigenes | Calprotectin...g.g.     | -0.331218068 | 3.92E-05    | 0.000258194 |
| k__Bacteria p__Firmicutes c__Bacilli                                                                                    | Butyrat...mol.g.        | 0.327407956  | 5.17E-05    | 0.000328011 |
| k__Bacteria p__Firmicutes c__Clostridia o__SHA-98 365762                                                                | Butyrat...mol.g.        | -0.327633752 | 5.10E-05    | 0.000328011 |
| k__Bacteria p__Firmicutes c__Clostridia o__Clostridiales f__[Ruminococcaceae/Lachnospiraceae]                           | Chromogranin.A..nmol.g. | -0.324818376 | 5.63E-05    | 0.000344898 |
| k__Bacteria p__Firmicutes c__Clostridia o__Clostridiales f__[Ruminococcaceae/[Mogibacteriaceae]]                        | Caproat...mol.g.        | 0.326028981  | 5.58E-05    | 0.000344898 |
| k__Bacteria p__Bacteroidetes c__Bacteroidia o__Bacteroidales f__[Bacteroidaceae/Rikenellaceae]                          | Valerat...mol.g.        | 0.323783905  | 6.32E-05    | 0.000380787 |
| k__Bacteria p__Firmicutes c__Bacilli o__Lactobacillales f__Lactobacillaceae g__Lactobacillus s__ruminis                 | Chromogranin.A..nmol.g. | 0.318025476  | 8.19E-05    | 0.00048483  |
| k__Bacteria p__Firmicutes c__Clostridia o__Clostridiales f__Lachnospiraceae g__Blautia s__obeum                         | Propionat...mol.g.      | -0.3181936   | 8.58E-05    | 0.000499988 |
| k__Bacteria p__Bacteroidetes c__Bacteroidia o__Bacteroidales f__Odoribacteraceae                                        | Valerat...mol.g.        | 0.317225642  | 9.04E-05    | 0.000518347 |
| k__Bacteria p__Bacteroidetes c__Bacteroidia o__Bacteroidales f__Bacteroidaceae g__Bacteroides                           | Caproat...mol.g.        | -0.314203907 | 0.000106354 | 0.000599944 |
| k__Bacteria p__Bacteroidetes c__Bacteroidia o__Bacteroidales f__Prevotellaceae g__Prevotella s__copri                   | Propionat...mol.g.      | 0.313438017  | 0.000110787 | 0.000615185 |
| k__Bacteria p__Firmicutes c__Clostridia o__Clostridiales f__[Ruminococcaceae/Lachnospiraceae]                           | Caproat...mol.g.        | 0.311970938  | 0.000119763 | 0.0006548   |
| k__Bacteria p__Firmicutes c__Clostridia o__Clostridiales f__[Veillonellaceae/Clostridiaceae]                            | Calprotectin...g.g.     | 0.310662328  | 0.000121612 | 0.000654835 |
| k__Bacteria p__Bacteroidetes c__Bacteroidia o__Bacteroidales f__Odoribacteraceae g__Odoribacter                         | Valerat...mol.g.        | 0.3112456    | 0.000124448 | 0.000660103 |
| k__Bacteria p__Bacteroidetes c__Bacteroidia o__Bacteroidales f__Bacteroidaceae g__Bacteroides s__plebeius               | Beta.Defensin.2..ng.g.  | 0.309536908  | 0.000129081 | 0.000664834 |
| k__Bacteria p__Firmicutes c__Clostridia o__Clostridiales f__Lachnospiraceae g__Roseburia s__faecis                      | Butyrat...mol.g.        | 0.310568816  | 0.000128973 | 0.000664834 |
| k__Bacteria p__Firmicutes c__Clostridia o__Clostridiales f__Ruminococcaceae g__Oscillospira                             | Acetat...mol.g.         | -0.310274643 | 0.000130987 | 0.00066501  |
| k__Bacteria p__Firmicutes c__Clostridia o__Clostridiales f__Veillonellaceae g__Dialister                                | Acetat...mol.g.         | 0.309350114  | 0.00013751  | 0.000688293 |
| k__Bacteria p__Firmicutes c__Clostridia o__Clostridiales f__Clostridiaceae g__Clostridium                               | Calprotectin...g.g.     | 0.305876397  | 0.000156439 | 0.000772168 |
| k__Bacteria p__Firmicutes c__Clostridia o__Clostridiales f__Lachnospiraceae g__Dorea                                    | Acetat...mol.g.         | -0.306400054 | 0.000160404 | 0.000780892 |
| k__Bacteria p__Firmicutes c__Clostridia o__Clostridiales f__Lachnospiraceae                                             | Beta.Defensin.2..ng.g.  | -0.304735039 | 0.000166017 | 0.000797297 |
| k__Bacteria p__Firmicutes c__Clostridia o__Clostridiales f__Peptococcaceae g__rc4-4                                     | Chromogranin.A..nmol.g. | -0.30424724  | 0.000170275 | 0.000806842 |
| k__Bacteria p__Firmicutes c__Clostridia o__Clostridiales f__Lachnospiraceae g__Roseburia s__faecis                      | Chromogranin.A..nmol.g. | 0.303829674  | 0.000174    | 0.000813645 |
| k__Bacteria p__Tenericutes                                                                                              | Caproat...mol.g.        | 0.30334239   | 0.000187844 | 0.00086697  |
| k__Bacteria p__Firmicutes c__Clostridia o__Clostridiales f__Lachnospiraceae g__Roseburia                                | Caproat...mol.g.        | -0.302404719 | 0.000197096 | 0.00089801  |
| k__Bacteria p__Firmicutes c__Bacilli o__Lactobacillales f__Streptococcaceae                                             | Butyrat...mol.g.        | 0.301378143  | 0.00020771  | 0.000923455 |
| k__Bacteria p__Firmicutes c__Bacilli o__Lactobacillales f__Streptococcaceae g__Streptococcus                            | Butyrat...mol.g.        | 0.301362377  | 0.000207877 | 0.000923455 |
| k__Bacteria p__Firmicutes c__Bacilli o__Lactobacillales                                                                 | Acetat...mol.g.         | 0.301000619  | 0.000211746 | 0.000929026 |
| k__Bacteria p__Bacteroidetes c__Bacteroidia o__Bacteroidales f__Bacteroidaceae g__Bacteroides s__fragilis               | Caproat...mol.g.        | -0.299823292 | 0.000224802 | 0.000974284 |
| k__Bacteria p__Bacteroidetes c__Bacteroidia o__Bacteroidales f__Bacteroidaceae g__Bacteroides s__fragilis               | Beta.Defensin.2..ng.g.  | -0.298451729 | 0.00022927  | 0.000981675 |
| k__Bacteria p__Firmicutes c__Clostridia o__Clostridiales f__Veillonellaceae g__Acidaminococcus                          | Chromogranin.A..nmol.g. | 0.297182456  | 0.000244503 | 0.001034319 |
| k__Bacteria p__Firmicutes c__Clostridia o__Clostridiales f__Ruminococcaceae                                             | Valerat...mol.g.        | -0.297929333 | 0.000247386 | 0.001034319 |
| k__Bacteria p__Firmicutes                                                                                               | Acetat...mol.g.         | -0.297359913 | 0.000254577 | 0.001052007 |
| k__Bacteria p__Firmicutes c__Clostridia o__Clostridiales f__Lachnospiraceae g__Roseburia s__faecis                      | Acetat...mol.g.         | 0.296608991  | 0.000264356 | 0.001079863 |
| k__Bacteria p__Firmicutes                                                                                               | Caproat...mol.g.        | -0.294582347 | 0.000292517 | 0.001181317 |
| k__Bacteria p__Firmicutes c__Clostridia o__Clostridiales f__Ruminococcaceae g__Ruminococcus                             | Butyrat...mol.g.        | -0.293569403 | 0.000307611 | 0.001228318 |

|                                                                                                                     |                         |              |             |             |
|---------------------------------------------------------------------------------------------------------------------|-------------------------|--------------|-------------|-------------|
| k__Bacteria p__Bacteroidetes c__Bacteroidia o__Bacteroidales f__Bacteroidaceae g__Bacteroides s__caccae             | Chromogranin.A..nmol.g. | -0.291766297 | 0.000320668 | 0.001243229 |
| k__Bacteria p__Firmicutes c__Bacilli                                                                                | Acetat...mol.g.         | 0.292436985  | 0.000325339 | 0.001243229 |
| k__Bacteria p__Firmicutes c__Clostridia o__Clostridiales f__Ruminococcaceae g__Oscillospira                         | Propionat...mol.g.      | -0.292597647 | 0.000322767 | 0.001243229 |
| k__Bacteria p__Tenericutes c__Mollicutes                                                                            | Caproat...mol.g.        | 0.292611343  | 0.000322549 | 0.001243229 |
| k__Bacteria p__Firmicutes c__Clostridia o__Clostridiales f__Ruminococcaceae g__Ruminococcus                         | Propionat...mol.g.      | -0.291955402 | 0.000333161 | 0.001259249 |
| k__Bacteria p__Tenericutes c__Mollicutes o__RF39                                                                    | Caproat...mol.g.        | 0.291745892  | 0.000336617 | 0.001259249 |
| k__Bacteria p__Firmicutes c__Clostridia o__Clostridiales f__Ruminococcaceae g__Faecalibacterium s__prausnitzii      | Beta.Defensin.2..ng.g.  | -0.287447051 | 0.000396571 | 0.001447306 |
| k__Bacteria p__Firmicutes c__Clostridia o__Clostridiales f__Ruminococcaceae                                         | Acetat...mol.g.         | -0.288266523 | 0.000399106 | 0.001447306 |
| k__Bacteria p__Bacteroidetes c__Bacteroidia o__Bacteroidales f__Bacteroidaceae g__Bacteroides s__caccae             | Caproat...mol.g.        | 0.28849788   | 0.000394639 | 0.001447306 |
| k__Bacteria p__Firmicutes c__Clostridia o__Clostridiales f__Lachnospiraceae g__Ruminococcus s__gnavus               | Chromogranin.A..nmol.g. | 0.285675978  | 0.000432248 | 0.001551659 |
| k__Bacteria p__Firmicutes c__Clostridia o__Clostridiales f__Lachnospiraceae g__Coprococcus s__catus                 | Chromogranin.A..nmol.g. | -0.284153533 | 0.000465262 | 0.0016371   |
| k__Bacteria p__Firmicutes c__Clostridia o__Clostridiales f__Lachnospiraceae g__Lachnospira                          | Chromogranin.A..nmol.g. | 0.284252309  | 0.000463052 | 0.0016371   |
| k__Bacteria p__Proteobacteria c__Alphaproteobacteria o__RF32                                                        | Acetat...mol.g.         | -0.284522506 | 0.000478207 | 0.001666151 |
| k__Bacteria p__Firmicutes c__Clostridia o__Clostridiales f__Lachnospiraceae g__Coprococcus s__eutactus              | Chromogranin.A..nmol.g. | -0.281926719 | 0.00051776  | 0.00178193  |
| k__Bacteria p__Firmicutes c__Clostridia                                                                             | Beta.Defensin.2..ng.g.  | -0.281777553 | 0.000521465 | 0.00178193  |
| k__Bacteria p__Firmicutes c__Clostridia o__Clostridiales                                                            | Beta.Defensin.2..ng.g.  | -0.281370342 | 0.000531704 | 0.001797528 |
| k__Bacteria p__Proteobacteria c__Alphaproteobacteria o__RF32                                                        | Butyrat...mol.g.        | -0.282127542 | 0.000536146 | 0.001797528 |
| k__Bacteria p__Lentisphaerae c__Lentisphaeria o__Victivallales f__Victivallaceae                                    | Chromogranin.A..nmol.g. | -0.280181618 | 0.000562663 | 0.001840334 |
| k__Bacteria p__Firmicutes c__Clostridia o__Clostridiales f__[Clostridiaceae/Lachnospiraceae]                        | Calprotectin...g.g.     | -0.28027055  | 0.000560291 | 0.001840334 |
| k__Bacteria p__Firmicutes c__Clostridia o__Clostridiales f__Veillonellaceae                                         | Valerat...mol.g.        | 0.281043239  | 0.000564449 | 0.001840334 |
| k__Bacteria p__Firmicutes c__Erysipelotrichi o__Erysipelotrichales f__Erysipelotrichaceae g__cc_115                 | Butyrat...mol.g.        | -0.280609941 | 0.00057614  | 0.001861373 |
| k__Bacteria p__Bacteroidetes c__Bacteroidia o__Bacteroidales f__Porphyromonadaceae g__Parabacteroides s__distasonis | Propionat...mol.g.      | -0.279584233 | 0.000604708 | 0.001918316 |
| k__Bacteria p__Bacteroidetes c__Bacteroidia o__Bacteroidales f__S24-7                                               | Valerat...mol.g.        | 0.279213314  | 0.000615356 | 0.001918316 |
| k__Bacteria p__Firmicutes c__Clostridia                                                                             | Caproat...mol.g.        | -0.279219276 | 0.000615184 | 0.001918316 |
| k__Bacteria p__Firmicutes c__Clostridia o__Clostridiales                                                            | Caproat...mol.g.        | -0.279245738 | 0.000614418 | 0.001918316 |
| k__Bacteria p__Firmicutes                                                                                           | Butyrat...mol.g.        | -0.278952608 | 0.000622943 | 0.001925082 |
| k__Bacteria p__Bacteroidetes c__Bacteroidia o__Bacteroidales                                                        | Acetat...mol.g.         | 0.277520304  | 0.000666186 | 0.002040967 |
| k__Bacteria p__Bacteroidetes c__Bacteroidia o__Bacteroidales f__Bacteroidaceae g__Bacteroides s__ovatus             | Caproat...mol.g.        | -0.277222607 | 0.000675513 | 0.002051855 |
| k__Bacteria p__Bacteroidetes c__Bacteroidia o__Bacteroidales f__[Bacteroidaceae/Rikenellaceae]                      | Beta.Defensin.2..ng.g.  | 0.274122988  | 0.000747893 | 0.002252453 |
| k__Bacteria p__Firmicutes c__Clostridia o__SHA-98 365762                                                            | Propionat...mol.g.      | -0.273119191 | 0.000816932 | 0.002439704 |
| k__Bacteria p__Firmicutes c__Clostridia o__Clostridiales f__Lachnospiraceae g__Blautia                              | Beta.Defensin.2..ng.g.  | -0.271652264 | 0.000838377 | 0.002482884 |
| k__Bacteria p__Firmicutes c__Clostridia o__Clostridiales f__Ruminococcaceae g__Faecalibacterium s__prausnitzii      | Valerat...mol.g.        | -0.271686843 | 0.000872375 | 0.002562218 |
| k__Bacteria p__Proteobacteria c__Betaproteobacteria o__Burkholderiales                                              | Calprotectin...g.g.     | -0.270255981 | 0.000893853 | 0.002603781 |
| k__Archaea p__Euryarchaeota c__Methanobacteria o__Methanobacteriales f__Methanobacteriaceae g__Methanobrevibacter   | Butyrat...mol.g.        | -0.270737213 | 0.000911014 | 0.002610969 |
| k__Bacteria                                                                                                         | Butyrat...mol.g.        | 0.270764776  | 0.00090987  | 0.002610969 |
| k__Bacteria p__Firmicutes c__Clostridia o__Clostridiales f__Lachnospiraceae g__Blautia s__obeum                     | Acetat...mol.g.         | -0.269767856 | 0.000952069 | 0.002686372 |
| k__Bacteria p__Firmicutes c__Clostridia o__Clostridiales f__Christensenellaceae g__Christensenella                  | Caproat...mol.g.        | 0.269759238  | 0.000952441 | 0.002686372 |
| k__Bacteria p__Firmicutes c__Bacilli                                                                                | Chromogranin.A..nmol.g. | 0.267784813  | 0.001000357 | 0.002777431 |
| k__Bacteria p__Bacteroidetes c__Bacteroidia o__Bacteroidales f__Rikenellaceae                                       | Valerat...mol.g.        | 0.268768283  | 0.000996174 | 0.002777431 |
| k__Bacteria p__Firmicutes c__Clostridia o__Clostridiales f__Lachnospiraceae g__Coprococcus s__catus                 | Acetat...mol.g.         | -0.267952763 | 0.001033535 | 0.002847305 |
| k__Bacteria p__Firmicutes c__Clostridia o__Clostridiales f__Ruminococcaceae g__Ruminococcus s__flavefaciens         | Chromogranin.A..nmol.g. | -0.266499375 | 0.001060241 | 0.00289663  |
| k__Bacteria p__Firmicutes c__Clostridia o__Clostridiales f__Peptococcaceae g__rc4-4                                 | Acetat...mol.g.         | -0.267229472 | 0.001067741 | 0.00289663  |
| k__Bacteria p__Actinobacteria c__Coriobacteriia o__Coriobacteriales f__Coriobacteriaceae g__Eggerthella s__lenta    | Caproat...mol.g.        | -0.266885405 | 0.001084373 | 0.002919466 |
| k__Bacteria p__Tenericutes c__RF3 o__ML615J-28                                                                      | Calprotectin...g.g.     | -0.264685277 | 0.001150348 | 0.003073804 |
| k__Bacteria p__Bacteroidetes c__Bacteroidia o__Bacteroidales f__Odoribacteraceae g__Butyricimonas                   | Valerat...mol.g.        | 0.26530627   | 0.001163795 | 0.003086526 |

|                                                                                                                  |                         |              |             |             |
|------------------------------------------------------------------------------------------------------------------|-------------------------|--------------|-------------|-------------|
| k_Bacteria p_Bacteroidetes c_Bacteroidia o_Bacteroidales f_Prevotellaceae g_Prevotella                           | Butyrat...mol.g.        | 0.264543102  | 0.001204053 | 0.003169644 |
| k_Bacteria p_Bacteroidetes c_Bacteroidia o_Bacteroidales f_Bacteroidaceae g_Bacteroides s_ovatus                 | Chromogranin.A..nmol.g. | 0.262525606  | 0.001266727 | 0.00328595  |
| k_Bacteria p_Firmicutes c_Clostridia o_Clostridiales f_Lachnospiraceae g_[Lachnospira/Roseburia]                 | Acetat...mol.g.         | 0.263405509  | 0.001266431 | 0.00328595  |
| k_Bacteria p_Firmicutes c_Clostridia o_Clostridiales f_Lachnospiraceae g_Coprococcus s_catus                     | Propionat...mol.g.      | -0.263203206 | 0.001277828 | 0.003290727 |
| k_Bacteria p_Bacteroidetes c_Bacteroidia o_Bacteroidales f_[Bacteroidaceae/Rikenellaceae]                        | Chromogranin.A..nmol.g. | -0.261336566 | 0.0013353   | 0.003404064 |
| k_Bacteria p_Proteobacteria c_Betaproteobacteria o_Burkholderiales f_Alcaligenaceae g_Sutterella                 | Calprotectin...g.g.     | -0.261240332 | 0.001340995 | 0.003404064 |
| k_Bacteria p_Firmicutes c_Clostridia o_Clostridiales f_Peptococcaceae g_rc4-4                                    | Butyrat...mol.g.        | -0.261632213 | 0.001369574 | 0.003451951 |
| k_Bacteria p_Bacteroidetes c_Bacteroidia o_Bacteroidales f_Odoribacteraceae                                      | Caproat...mol.g.        | 0.261237832  | 0.00139353  | 0.003487599 |
| k_Bacteria p_Firmicutes c_Clostridia o_Clostridiales f_Ruminococcaceae g_Ruminococcus s_flavefaciens             | Beta.Defensin.2..ng.g.  | 0.25893675   | 0.001484126 | 0.003670847 |
| k_Bacteria p_Bacteroidetes c_Bacteroidia o_Bacteroidales f_Prevotellaceae g_Prevotella s_copri                   | Acetat...mol.g.         | 0.259749729  | 0.001487409 | 0.003670847 |
| k_Bacteria p_Actinobacteria c_Coriobacteriia o_Coriobacteriales f_Coriobacteriaceae g_Eggerthella s_lenta        | Chromogranin.A..nmol.g. | 0.257738908  | 0.001563935 | 0.003833092 |
| k_Bacteria p_Proteobacteria                                                                                      | Calprotectin...g.g.     | -0.257182693 | 0.001602308 | 0.003893918 |
| k_Bacteria p_Bacteroidetes c_Bacteroidia o_Bacteroidales                                                         | Butyrat...mol.g.        | 0.257920894  | 0.001610667 | 0.003893918 |
| k_Bacteria p_Bacteroidetes c_Bacteroidia o_Bacteroidales f_Porphyrimonadaceae g_Parabacteroides s_gordonii       | Calprotectin...g.g.     | -0.256685253 | 0.00163735  | 0.00393168  |
| k_Bacteria p_Bacteroidetes c_Bacteroidia o_Bacteroidales f_Bacteroidaceae g_Bacteroides s_ovatus                 | Beta.Defensin.2..ng.g.  | -0.25598308  | 0.001688003 | 0.003972781 |
| k_Bacteria p_Firmicutes c_Bacilli o_Lactobacillales f_Streptococcaceae                                           | Acetat...mol.g.         | 0.2568864    | 0.00168444  | 0.003972781 |
| k_Bacteria p_Firmicutes c_Clostridia                                                                             | Butyrat...mol.g.        | -0.25714453  | 0.001665749 | 0.003972781 |
| k_Bacteria p_Firmicutes c_Clostridia o_Clostridiales                                                             | Butyrat...mol.g.        | -0.256632621 | 0.001703001 | 0.003981712 |
| k_Bacteria p_Proteobacteria c_Gammaproteobacteria o_Aeromonadales f_Succinivibrionaceae g_Succinivibrio          | Calprotectin...g.g.     | 0.255569569  | 0.001718496 | 0.003991678 |
| k_Bacteria p_Firmicutes c_Erysipelotrichi o_Erysipelotrichales f_Erysipelotrichaceae                             | Butyrat...mol.g.        | -0.255574099 | 0.001782447 | 0.004113336 |
| k_Bacteria p_Proteobacteria c_Alphaproteobacteria o_RF32                                                         | Propionat...mol.g.      | -0.254186558 | 0.00189169  | 0.004309469 |
| k_Bacteria p_Firmicutes c_Clostridia o_Clostridiales f_Lachnospiraceae g_Roseburia s_faecis                      | Caproat...mol.g.        | -0.254294182 | 0.001883004 | 0.004309469 |
| k_Bacteria p_Firmicutes c_Clostridia o_Clostridiales f_[Ruminococcaceae/[Mogibacteriaceae]]                      | Chromogranin.A..nmol.g. | -0.25292671  | 0.00192552  | 0.004331012 |
| k_Bacteria p_Bacteroidetes c_Bacteroidia o_Bacteroidales f_Paraprevotellaceae g_Prevotella                       | Butyrat...mol.g.        | 0.253853651  | 0.001918789 | 0.004331012 |
| k_Bacteria p_Bacteroidetes c_Bacteroidia o_Bacteroidales f_Rikenellaceae                                         | Chromogranin.A..nmol.g. | -0.252617687 | 0.001951151 | 0.004361062 |
| k_Bacteria p_Bacteroidetes c_Bacteroidia o_Bacteroidales f_Bacteroidaceae g_Bacteroides s_caccae                 | Valerat...mol.g.        | 0.253057483  | 0.001985036 | 0.004409068 |
| k_Archaea p_Euryarchaeota c_Methanobacteria o_Methanobacteriales f_Methanobacteriaceae g_Methanobrevibacter      | Calprotectin...g.g.     | -0.250427215 | 0.002141908 | 0.004698771 |
| k_Bacteria                                                                                                       | Calprotectin...g.g.     | 0.25051229   | 0.002134194 | 0.004698771 |
| k_Bacteria p_Firmicutes c_Clostridia                                                                             | Acetat...mol.g.         | -0.250043682 | 0.002255046 | 0.004916616 |
| k_Bacteria p_Firmicutes c_Clostridia o_Clostridiales                                                             | Acetat...mol.g.         | -0.249254102 | 0.002331086 | 0.005051414 |
| k_Bacteria p_Firmicutes c_Clostridia o_Clostridiales f_Lachnospiraceae g_Roseburia                               | Beta.Defensin.2..ng.g.  | -0.24732788  | 0.002440768 | 0.005207687 |
| k_Bacteria p_Firmicutes c_Bacilli o_Lactobacillales f_Streptococcaceae g_Streptococcus                           | Acetat...mol.g.         | 0.248213605  | 0.002434838 | 0.005207687 |
| k_Bacteria p_Firmicutes c_Clostridia o_Clostridiales f_Veillonellaceae g_Dialister                               | Butyrat...mol.g.        | 0.248092685  | 0.002447163 | 0.005207687 |
| k_Bacteria p_Firmicutes c_Clostridia o_Clostridiales f_Veillonellaceae g_Dialister                               | Propionat...mol.g.      | 0.247104879  | 0.00254998  | 0.005394186 |
| k_Bacteria p_Proteobacteria c_Betaproteobacteria o_Burkholderiales f_Oxalobacteraceae g_Oxalobacter s_formigenes | Acetat...mol.g.         | -0.24685968  | 0.0025761   | 0.005417195 |
| k_Bacteria p_Firmicutes                                                                                          | Beta.Defensin.2..ng.g.  | -0.245052609 | 0.002683677 | 0.005610217 |
| k_Bacteria p_Bacteroidetes c_Bacteroidia o_Bacteroidales f_Prevotellaceae g_Prevotella                           | Acetat...mol.g.         | 0.244152465  | 0.002881013 | 0.005918436 |
| k_Bacteria p_Tenericutes                                                                                         | Acetat...mol.g.         | -0.244294187 | 0.002864275 | 0.005918436 |
| k_Bacteria p_Synergistetes c_Synergistia o_Synergistales f_Synergistaceae                                        | Valerat...mol.g.        | -0.244151935 | 0.002881075 | 0.005918436 |
| k_Bacteria p_Bacteroidetes c_Bacteroidia o_Bacteroidales f_Prevotellaceae g_Prevotella s_stercorea               | Beta.Defensin.2..ng.g.  | 0.243077133  | 0.002912087 | 0.00594776  |
| k_Bacteria p_Proteobacteria c_Betaproteobacteria o_Burkholderiales f_Oxalobacteraceae g_Oxalobacter s_formigenes | Butyrat...mol.g.        | -0.243540634 | 0.002954287 | 0.005999472 |
| k_Bacteria p_Firmicutes c_Bacilli o_Lactobacillales                                                              | Chromogranin.A..nmol.g. | 0.242182786  | 0.003021153 | 0.006065938 |
| k_Bacteria p_Bacteroidetes c_Bacteroidia o_Bacteroidales                                                         | Caproat...mol.g.        | 0.243038186  | 0.003015715 | 0.006065938 |
| k_Bacteria p_Bacteroidetes c_Bacteroidia o_Bacteroidales f_Odoribacteraceae g_Odoribacter                        | Caproat...mol.g.        | 0.242583929  | 0.003072242 | 0.006133859 |
| k_Bacteria p_Firmicutes c_Clostridia o_Clostridiales f_Ruminococcaceae                                           | Butyrat...mol.g.        | -0.24173437  | 0.003180531 | 0.006314587 |

|                                                                                                                               |                         |              |             |             |
|-------------------------------------------------------------------------------------------------------------------------------|-------------------------|--------------|-------------|-------------|
| k__Bacteria p__Actinobacteria c__Actinobacteria o__Bifidobacteriales f__Bifidobacteriaceae g__Bifidobacterium s__adolescentis | Butyrat...mol.g.        | 0.240889812  | 0.003291583 | 0.006498763 |
| k__Bacteria p__Bacteroidetes c__Bacteroidia o__Bacteroidales f__Bacteroidaceae g__Bacteroides s__coprophilus                  | Acetat...mol.g.         | 0.240748372  | 0.003310519 | 0.006500038 |
| k__Bacteria p__Bacteroidetes c__Bacteroidia o__Bacteroidales f__Prevotellaceae g__Prevotella s__copri                         | Butyrat...mol.g.        | 0.240441657  | 0.00335192  | 0.006516196 |
| k__Bacteria p__Firmicutes c__Clostridia o__Clostridiales f__Dehalobacteriaceae g__Dehalobacterium                             | Butyrat...mol.g.        | -0.240415887 | 0.003355419 | 0.006516196 |
| k__Bacteria p__Firmicutes c__Clostridia o__Clostridiales f__Veillonellaceae g__Acidaminococcus                                | Propionat...mol.g.      | 0.23963504   | 0.003463035 | 0.006688634 |
| k__Bacteria p__Firmicutes c__Clostridia o__Clostridiales f__Lachnospiraceae g__Ruminococcus s__gnavus                         | Caproat...mol.g.        | -0.238377577 | 0.003642883 | 0.006997967 |
| k__Bacteria p__Firmicutes c__Clostridia o__Clostridiales f__Dehalobacteriaceae g__Dehalobacterium                             | Acetat...mol.g.         | -0.238038624 | 0.003692778 | 0.007017946 |
| k__Bacteria p__Firmicutes c__Erysipelotrichi o__Erysipelotrichales f__Erysipelotrichaceae                                     | Propionat...mol.g.      | -0.238167558 | 0.003673726 | 0.007017946 |
| k__Bacteria p__Firmicutes c__Clostridia o__Clostridiales f__Lachnospiraceae g__Blautia                                        | Propionat...mol.g.      | -0.237765699 | 0.0037334   | 0.007057406 |
| k__Bacteria p__Bacteroidetes c__Bacteroidia o__Bacteroidales f__Paraprevotellaceae g__Prevotella                              | Valerat...mol.g.        | 0.236765845  | 0.003885673 | 0.00730639  |
| k__Bacteria p__Bacteroidetes c__Bacteroidia o__Bacteroidales f__Porphyromonadaceae g__Parabacteroides s__distasonis           | Acetat...mol.g.         | -0.236432619 | 0.003937648 | 0.007365153 |
| k__Bacteria p__Bacteroidetes c__Bacteroidia o__Bacteroidales f__Porphyromonadaceae g__Parabacteroides                         | Beta.Defensin.2..ng.g.  | -0.234039383 | 0.004197265 | 0.007809648 |
| k__Bacteria p__Synergistetes c__Synergistia o__Synergistales f__Synergistaceae                                                | Butyrat...mol.g.        | -0.234265501 | 0.004291185 | 0.007942815 |
| k__Bacteria p__Firmicutes c__Clostridia o__SHA-98 365762                                                                      | Calprotectin...g.g.     | -0.233211985 | 0.004337241 | 0.007986467 |
| k__Bacteria p__Firmicutes c__Clostridia o__Clostridiales f__Lachnospiraceae g__Anaerostipes                                   | Beta.Defensin.2..ng.g.  | -0.232127808 | 0.004526993 | 0.008292902 |
| k__Bacteria p__Cyanobacteria c__4C0d-2 o__YS2                                                                                 | Chromogranin.A..nmol.g. | -0.23046206  | 0.004833054 | 0.008808165 |
| k__Bacteria p__Bacteroidetes c__Bacteroidia o__Bacteroidales f__Prevotellaceae g__Prevotella                                  | Beta.Defensin.2..ng.g.  | 0.229725171  | 0.004974263 | 0.009019265 |
| k__Bacteria p__Firmicutes c__Clostridia o__Clostridiales f__Ruminococcaceae g__Ruminococcus s__bromii                         | Beta.Defensin.2..ng.g.  | -0.229178685 | 0.005081359 | 0.009120383 |
| k__Bacteria p__Firmicutes c__Clostridia o__SHA-98 365762                                                                      | Acetat...mol.g.         | -0.229992808 | 0.005072729 | 0.009120383 |
| k__Bacteria p__Firmicutes c__Clostridia o__Clostridiales f__Ruminococcaceae g__Faecalibacterium s__prausnitzii                | Calprotectin...g.g.     | -0.228564247 | 0.00520423  | 0.009272175 |
| k__Bacteria p__Tenericutes c__Mollicutes o__RF39                                                                              | Acetat...mol.g.         | -0.229263824 | 0.00521811  | 0.009272175 |
| k__Bacteria p__Tenericutes c__Mollicutes                                                                                      | Acetat...mol.g.         | -0.228627921 | 0.005347957 | 0.009455626 |
| k__Bacteria p__Firmicutes c__Clostridia o__Clostridiales f__Lachnospiraceae g__Dorea                                          | Propionat...mol.g.      | -0.228089517 | 0.005460145 | 0.009558871 |
| k__Bacteria p__Firmicutes c__Clostridia o__Clostridiales f__Veillonellaceae g__Acidaminococcus                                | Butyrat...mol.g.        | 0.228136138  | 0.005450348 | 0.009558871 |
| k__Bacteria p__Firmicutes c__Clostridia o__Clostridiales f__Peptostreptococcaceae                                             | Chromogranin.A..nmol.g. | 0.226623618  | 0.005609939 | 0.009747636 |
| k__Bacteria p__Bacteroidetes c__Bacteroidia o__Bacteroidales f__Porphyromonadaceae g__Parabacteroides s__distasonis           | Butyrat...mol.g.        | -0.227199314 | 0.005650255 | 0.009747636 |
| k__Bacteria p__Firmicutes c__Erysipelotrichi o__Erysipelotrichales f__Erysipelotrichaceae g__Coprobacillus                    | Butyrat...mol.g.        | -0.227226684 | 0.005644323 | 0.009747636 |
| k__Bacteria p__Firmicutes c__Clostridia o__Clostridiales f__[Veillonellaceae/Clostridiaceae]                                  | Beta.Defensin.2..ng.g.  | 0.22607849   | 0.005728873 | 0.00983552  |
| k__Bacteria p__Proteobacteria c__Gammaproteobacteria o__Aeromonadales f__Succinivibrionaceae g__Succinivibrio                 | Beta.Defensin.2..ng.g.  | 0.22579553   | 0.005791492 | 0.009895222 |
| k__Bacteria p__Firmicutes c__Clostridia o__SHA-98 365762                                                                      | Chromogranin.A..nmol.g. | -0.224872199 | 0.006000092 | 0.010153997 |
| k__Bacteria p__Proteobacteria c__Gammaproteobacteria o__Enterobacteriales f__Enterobacteriaceae                               | Calprotectin...g.g.     | -0.224988433 | 0.005973468 | 0.010153997 |
| k__Bacteria p__Firmicutes c__Erysipelotrichi o__Erysipelotrichales f__Erysipelotrichaceae g__Eubacterium s__biforme           | Calprotectin...g.g.     | 0.224701784  | 0.006039316 | 0.010171938 |
| k__Bacteria p__Synergistetes c__Synergistia o__Synergistales f__Synergistaceae                                                | Propionat...mol.g.      | -0.225173173 | 0.00610515  | 0.010234317 |
| k__Bacteria p__Firmicutes c__Clostridia o__Clostridiales f__Lachnospiraceae g__[Lachnospira/Roseburia]                        | Butyrat...mol.g.        | 0.224455299  | 0.006273987 | 0.010467969 |
| k__Bacteria p__Bacteroidetes c__Bacteroidia o__Bacteroidales f__Barnesiellaceae                                               | Valerat...mol.g.        | 0.223726097  | 0.006449734 | 0.010710912 |
| k__Bacteria p__Firmicutes c__Bacilli o__Lactobacillales                                                                       | Propionat...mol.g.      | 0.223070534  | 0.00661146  | 0.010927016 |
| k__Bacteria p__Firmicutes c__Clostridia o__Clostridiales f__Lachnospiraceae g__Coproccoccus s__catus                          | Butyrat...mol.g.        | -0.222950907 | 0.006641358 | 0.010927016 |
| k__Bacteria p__Firmicutes c__Clostridia o__Clostridiales f__Lachnospiraceae g__[Lachnospira/Roseburia]                        | Valerat...mol.g.        | 0.222366031  | 0.006789273 | 0.011118904 |
| k__Bacteria p__Firmicutes c__Erysipelotrichi o__Erysipelotrichales f__Erysipelotrichaceae g__Catenibacterium                  | Calprotectin...g.g.     | 0.220749368  | 0.007015548 | 0.011436774 |
| k__Bacteria p__Tenericutes                                                                                                    | Propionat...mol.g.      | -0.220467579 | 0.007289785 | 0.011829572 |
| k__Bacteria p__Bacteroidetes c__Bacteroidia o__Bacteroidales f__Bacteroidaceae g__Bacteroides                                 | Chromogranin.A..nmol.g. | 0.219417436  | 0.007374799 | 0.0118773   |
| k__Bacteria p__Bacteroidetes c__Bacteroidia o__Bacteroidales f__Bacteroidaceae g__Bacteroides s__plebeius                     | Propionat...mol.g.      | 0.220115823  | 0.007386039 | 0.0118773   |
| k__Bacteria p__Firmicutes c__Clostridia o__Clostridiales f__Lachnospiraceae g__Dorea                                          | Butyrat...mol.g.        | -0.219801794 | 0.007472921 | 0.011962883 |
| k__Bacteria p__Bacteroidetes c__Bacteroidia o__Bacteroidales f__Paraprevotellaceae g__Prevotella                              | Acetat...mol.g.         | 0.219236705  | 0.00763155  | 0.012162037 |
| k__Bacteria p__Firmicutes c__Clostridia o__Clostridiales f__Clostridiaceae g__Clostridium                                     | Butyrat...mol.g.        | 0.218580124  | 0.007819609 | 0.012406104 |

|                                                                                                                        |                         |              |             |             |
|------------------------------------------------------------------------------------------------------------------------|-------------------------|--------------|-------------|-------------|
| k_Bacteria p_Firmicutes c_Clostridia o_Clostridiales f_Ruminococcaceae g_Ruminococcus                                  | Valerat...mol.g.        | -0.218236566 | 0.007919639 | 0.012508962 |
| k_Bacteria p_Proteobacteria c_Betaproteobacteria o_Burkholderiales f_Alcaligenaceae g_Sutterella                       | Acetat...mol.g.         | 0.217918954  | 0.008013122 | 0.012545105 |
| k_Bacteria p_Firmicutes c_Clostridia o_Clostridiales f_Lachnospiraceae g_[Lachnospira/Roseburia]                       | Propionat...mol.g.      | 0.218011478  | 0.007985789 | 0.012545105 |
| k_Bacteria p_Firmicutes c_Clostridia o_Clostridiales f_Lachnospiraceae g_Dorea s_formicigenerans                       | Acetat...mol.g.         | -0.217202523 | 0.008227588 | 0.012769096 |
| k_Bacteria p_Firmicutes c_Clostridia o_Clostridiales f_Lachnospiraceae g_Blautia s_obeum                               | Butyrat...mol.g.        | -0.21720098  | 0.008228055 | 0.012769096 |
| k_Bacteria p_Firmicutes c_Clostridia o_Clostridiales f_Dehalobacteriaceae g_Dehalobacterium                            | Chromogranin.A..nmol.g. | -0.215122411 | 0.008647026 | 0.013360951 |
| k_Bacteria p_Bacteroidetes c_Bacteroidia o_Bacteroidales f_Bacteroidaceae g_Bacteroides s_uniformis                    | Propionat...mol.g.      | 0.215186021  | 0.008858768 | 0.013628868 |
| k_Bacteria p_Actinobacteria c_Coriobacteriia o_Coriobacteriales f_Coriobacteriaceae                                    | Acetat...mol.g.         | -0.214856379 | 0.008965922 | 0.013734264 |
| k_Bacteria p_Firmicutes c_Clostridia o_Clostridiales f_Lachnospiraceae g_Blautia s_obeum                               | Valerat...mol.g.        | -0.214359593 | 0.009129572 | 0.013865418 |
| k_Bacteria p_Firmicutes c_Clostridia o_Clostridiales f_[Ruminococcaceae/Lachnospiraceae]                               | Valerat...mol.g.        | 0.214463082  | 0.009095264 | 0.013865418 |
| k_Bacteria p_Proteobacteria c_Alphaproteobacteria o_RF32                                                               | Calprotectin...g.g.     | -0.213483856 | 0.009181333 | 0.013884693 |
| k_Bacteria p_Bacteroidetes c_Bacteroidia o_Bacteroidales                                                               | Beta.Defensin.2..ng.g.  | 0.212764422  | 0.009425001 | 0.014192791 |
| k_Bacteria p_Synergistetes c_Synergistia o_Synergistales f_Synergistaceae                                              | Acetat...mol.g.         | -0.212756533 | 0.009675784 | 0.014508959 |
| k_Bacteria p_Bacteroidetes c_Bacteroidia o_Bacteroidales f_Bacteroidaceae g_Bacteroides s_uniformis                    | Beta.Defensin.2..ng.g.  | -0.211610216 | 0.009827858 | 0.014554228 |
| k_Bacteria p_Bacteroidetes c_Bacteroidia o_Bacteroidales f_Bacteroidaceae g_Bacteroides s_fragilis                     | Calprotectin...g.g.     | -0.211377942 | 0.009910741 | 0.014554228 |
| k_Bacteria p_Firmicutes c_Clostridia o_Clostridiales f_Peptococcaceae g_rc4-4                                          | Propionat...mol.g.      | -0.212220943 | 0.009864595 | 0.014554228 |
| k_Bacteria p_Tenericutes                                                                                               | Butyrat...mol.g.        | -0.212112492 | 0.009903221 | 0.014554228 |
| k_Bacteria p_Bacteroidetes c_Bacteroidia o_Bacteroidales f_Bacteroidaceae g_Bacteroides s_coprophilus                  | Caproat...mol.g.        | -0.212182379 | 0.009878315 | 0.014554228 |
| k_Bacteria p_Firmicutes c_Clostridia o_Clostridiales f_Veillonellaceae g_Phascolarctobacterium                         | Beta.Defensin.2..ng.g.  | -0.210626404 | 0.010183152 | 0.014892732 |
| k_Bacteria p_Proteobacteria c_Betaproteobacteria o_Burkholderiales f_Oxalobacteraceae g_Oxalobacter s_formigenes       | Caproat...mol.g.        | 0.210869891  | 0.010355386 | 0.015082554 |
| k_Bacteria p_Bacteroidetes c_Bacteroidia o_Bacteroidales f_Bacteroidaceae g_Bacteroides s_ovatus                       | Valerat...mol.g.        | -0.210476776 | 0.010502172 | 0.015233913 |
| k_Bacteria p_Firmicutes c_Clostridia o_Clostridiales f_Ruminococcaceae g_Ruminococcus s_bromii                         | Propionat...mol.g.      | -0.210345957 | 0.010551423 | 0.015243138 |
| k_Bacteria p_Bacteroidetes c_Bacteroidia o_Bacteroidales f_Barnesiellaceae                                             | Calprotectin...g.g.     | -0.208696901 | 0.010912972 | 0.015524708 |
| k_Bacteria p_Tenericutes c_RF3 o_ML615J-28                                                                             | Acetat...mol.g.         | -0.209555157 | 0.0108535   | 0.015524708 |
| k_Bacteria p_Bacteroidetes c_Bacteroidia o_Bacteroidales f_Porphyromonadaceae g_Parabacteroides                        | Butyrat...mol.g.        | -0.209414214 | 0.01090813  | 0.015524708 |
| k_Bacteria p_Firmicutes c_Clostridia o_Clostridiales f_[Ruminococcaceae/[Mogibacteriaceae]]                            | Valerat...mol.g.        | 0.209380932  | 0.010921066 | 0.015524708 |
| k_Bacteria p_Firmicutes c_Erysipelotrichi o_Erysipelotrichales f_Erysipelotrichaceae g_cc_115                          | Propionat...mol.g.      | -0.208945271 | 0.011091639 | 0.015668092 |
| k_Bacteria p_Firmicutes c_Clostridia o_Clostridiales f_Lachnospiraceae g_Coprococcus                                   | Caproat...mol.g.        | 0.208898457  | 0.011110106 | 0.015668092 |
| k_Bacteria p_Actinobacteria c_Coriobacteriia o_Coriobacteriales f_Coriobacteriaceae g_Collinsella                      | Butyrat...mol.g.        | 0.208624844  | 0.011218585 | 0.0156965   |
| k_Bacteria p_Firmicutes c_Erysipelotrichi o_Erysipelotrichales f_Erysipelotrichaceae g_Coprobacillus                   | Valerat...mol.g.        | -0.208630515 | 0.011216328 | 0.0156965   |
| k_Bacteria p_Firmicutes c_Clostridia o_Clostridiales f_Lachnospiraceae g_Roseburia                                     | Calprotectin...g.g.     | 0.207450004  | 0.011408719 | 0.015837818 |
| k_Bacteria p_Firmicutes c_Clostridia o_Clostridiales f_[Ruminococcaceae/Clostridiaceae]                                | Caproat...mol.g.        | -0.208259581 | 0.011364851 | 0.015837818 |
| k_Bacteria p_Firmicutes c_Bacilli o_Lactobacillales f_Streptococcaceae                                                 | Propionat...mol.g.      | 0.20794702   | 0.01149134  | 0.015890442 |
| k_Bacteria p_Tenericutes c_Mollicutes o_RF39                                                                           | Butyrat...mol.g.        | -0.20764489  | 0.011614781 | 0.015998886 |
| k_Bacteria p_Actinobacteria                                                                                            | Chromogranin.A..nmol.g. | -0.20580935  | 0.012091098 | 0.016400719 |
| k_Bacteria p_Firmicutes c_Clostridia o_Clostridiales f_Lachnospiraceae                                                 | Propionat...mol.g.      | -0.206608518 | 0.012047102 | 0.016400719 |
| k_Bacteria p_Tenericutes c_Mollicutes o_RF39                                                                           | Propionat...mol.g.      | -0.206773715 | 0.011977259 | 0.016400719 |
| k_Bacteria p_Bacteroidetes c_Bacteroidia o_Bacteroidales f_Bacteroidaceae g_Bacteroides s_plebeius                     | Valerat...mol.g.        | 0.206571342  | 0.012062869 | 0.016400719 |
| k_Bacteria p_Tenericutes c_Mollicutes                                                                                  | Propionat...mol.g.      | -0.206249471 | 0.012200137 | 0.0164857   |
| k_Bacteria p_Firmicutes c_Erysipelotrichi o_Erysipelotrichales f_Erysipelotrichaceae g_Eubacterium                     | Calprotectin...g.g.     | 0.205113273  | 0.012391261 | 0.016555118 |
| k_Bacteria                                                                                                             | Acetat...mol.g.         | 0.205812879  | 0.012388517 | 0.016555118 |
| k_Bacteria p_Tenericutes c_Mollicutes                                                                                  | Butyrat...mol.g.        | -0.205973738 | 0.012318815 | 0.016555118 |
| k_Archaea p_Euryarchaeota c_Methanobacteria o_Methanobacteriales f_Methanobacteriaceae g_Methanobrevibacter            | Acetat...mol.g.         | -0.20564022  | 0.012463716 | 0.016589555 |
| k_Bacteria p_Actinobacteria c_Actinobacteria o_Bifidobacteriales f_Bifidobacteriaceae g_Bifidobacterium s_adolescentis | Acetat...mol.g.         | 0.205330604  | 0.012599568 | 0.016707801 |
| k_Bacteria p_Bacteroidetes c_Bacteroidia o_Bacteroidales f_Porphyromonadaceae g_Parabacteroides                        | Acetat...mol.g.         | -0.204763735 | 0.01285166  | 0.016978736 |

|                                                                                                                  |                         |              |             |             |
|------------------------------------------------------------------------------------------------------------------|-------------------------|--------------|-------------|-------------|
| k_Bacteria p_Firmicutes c_Bacilli o_Lactobacillales f_Streptococcaceae g_Streptococcus                           | Propionat...mol.g.      | 0.204462761  | 0.012987292 | 0.017094377 |
| k_Bacteria p_Proteobacteria c_Betaproteobacteria o_Burkholderiales f_Alcaligenaceae g_Sutterella                 | Butyrat...mol.g.        | 0.204241429  | 0.013087833 | 0.017163145 |
| k_Bacteria p_Firmicutes c_Clostridia o_Clostridiales f_Clostridiaceae g_Clostridium                              | Propionat...mol.g.      | 0.203162272  | 0.013587858 | 0.017753359 |
| k_Bacteria p_Actinobacteria c_Coriobacteriia o_Coriobacteriales f_Coriobacteriaceae g_Collinsella                | Acetat...mol.g.         | 0.202984171  | 0.013671967 | 0.017797819 |
| k_Bacteria p_Firmicutes c_Clostridia o_Clostridiales f_Dehalobacteriaceae g_Dehalobacterium                      | Propionat...mol.g.      | -0.202449908 | 0.013927011 | 0.017958993 |
| k_Bacteria p_Actinobacteria c_Coriobacteriia o_Coriobacteriales f_Coriobacteriaceae g_Eggerthella s_lenta        | Valerat...mol.g.        | -0.202407608 | 0.01394738  | 0.017958993 |
| k_Bacteria p_Firmicutes c_Erysipelotrichi o_Erysipelotrichales f_Erysipelotrichaceae g_Coprobacillus             | Caproat...mol.g.        | -0.202476632 | 0.013914155 | 0.017958993 |
| k_Bacteria p_Firmicutes c_Clostridia o_Clostridiales f_Lachnospiraceae g_Coprococcus s_eutactus                  | Caproat...mol.g.        | 0.202095069  | 0.01409869  | 0.018088286 |
| k_Bacteria p_Bacteroidetes c_Bacteroidia o_Bacteroidales f_Bacteroidaceae g_Bacteroides s_coprophilus            | Butyrat...mol.g.        | 0.201406965  | 0.014436884 | 0.018455555 |
| k_Bacteria p_Firmicutes c_Clostridia o_Clostridiales f_Lachnospiraceae g_Blautia s_obeum                         | Beta.Defensin.2..ng.g.  | -0.20057309  | 0.014514169 | 0.01848785  |
| k_Bacteria p_Bacteroidetes c_Bacteroidia o_Bacteroidales f_Prevotellaceae g_Prevotella s_copri                   | Beta.Defensin.2..ng.g.  | 0.199844805  | 0.014882711 | 0.018889586 |
| k_Bacteria p_Proteobacteria c_Betaproteobacteria o_Burkholderiales f_Oxalobacteraceae g_Oxalobacter s_formigenes | Propionat...mol.g.      | -0.199318438 | 0.015507093 | 0.019612028 |
| k_Bacteria p_Firmicutes c_Bacilli                                                                                | Propionat...mol.g.      | 0.19895721   | 0.01569904  | 0.019784379 |
| k_Bacteria p_Proteobacteria c_Betaproteobacteria o_Burkholderiales                                               | Acetat...mol.g.         | 0.198679394  | 0.015848068 | 0.019901615 |
| k_Bacteria p_Firmicutes c_Erysipelotrichi o_Erysipelotrichales f_Erysipelotrichaceae                             | Calprotectin...g.g.     | 0.197750734  | 0.015988222 | 0.019936722 |
| k_Bacteria p_Bacteroidetes c_Bacteroidia o_Bacteroidales f_Bacteroidaceae g_Bacteroides s_eggerthii              | Valerat...mol.g.        | 0.198439173  | 0.01597792  | 0.019936722 |
| k_Bacteria p_Firmicutes c_Clostridia o_Clostridiales f_[Veillonellaceae/Lachnospiraceae]                         | Butyrat...mol.g.        | 0.19795307   | 0.016243518 | 0.020184244 |
| k_Bacteria p_Tenericutes c_Mollicutes                                                                            | Beta.Defensin.2..ng.g.  | 0.196446309  | 0.016712406 | 0.020694527 |
| k_Bacteria p_Tenericutes c_Mollicutes o_RF39                                                                     | Beta.Defensin.2..ng.g.  | 0.195778711  | 0.017093945 | 0.021093481 |
| k_Bacteria p_Tenericutes c_RF3 o_ML615J-28                                                                       | Propionat...mol.g.      | -0.194692686 | 0.018126183 | 0.022223812 |
| k_Bacteria p_Firmicutes c_Erysipelotrichi o_Erysipelotrichales f_Erysipelotrichaceae g_Catenibacterium           | Butyrat...mol.g.        | 0.194678083  | 0.018135023 | 0.022223812 |
| k_Archaea p_Euryarchaeota c_Methanobacteria o_Methanobacteriales f_Methanobacteriaceae g_Methanobrevibacter      | Propionat...mol.g.      | -0.193877814 | 0.018625256 | 0.022668241 |
| k_Bacteria                                                                                                       | Propionat...mol.g.      | 0.193952531  | 0.018579004 | 0.022668241 |
| k_Bacteria p_Bacteroidetes c_Bacteroidia o_Bacteroidales f_Bacteroidaceae g_Bacteroides s_plebeius               | Butyrat...mol.g.        | 0.193496207  | 0.018863035 | 0.022879281 |
| k_Bacteria p_Firmicutes c_Clostridia o_Clostridiales f_Lachnospiraceae g_Lachnospira                             | Calprotectin...g.g.     | 0.192525769  | 0.019063166 | 0.022965263 |
| k_Bacteria p_Firmicutes c_Clostridia o_Clostridiales f_[Veillonellaceae/Clostridiaceae]                          | Propionat...mol.g.      | 0.193276708  | 0.019000991 | 0.022965263 |
| k_Bacteria p_Bacteroidetes c_Bacteroidia o_Bacteroidales f_Paraprevotellaceae g_Prevotella                       | Beta.Defensin.2..ng.g.  | 0.192085737  | 0.019344066 | 0.023224934 |
| k_Bacteria p_Actinobacteria c_Coriobacteriia o_Coriobacteriales f_Coriobacteriaceae g_Slackia                    | Valerat...mol.g.        | 0.192633208  | 0.019410477 | 0.023226201 |
| k_Bacteria p_Tenericutes                                                                                         | Beta.Defensin.2..ng.g.  | 0.191392235  | 0.019794039 | 0.023605684 |
| k_Bacteria p_Firmicutes c_Clostridia o_Clostridiales f_Lachnospiraceae g_Anaerostipes                            | Valerat...mol.g.        | -0.191362821 | 0.02024132  | 0.024058363 |
| k_Bacteria p_Firmicutes c_Erysipelotrichi o_Erysipelotrichales f_Erysipelotrichaceae g_Coprobacillus             | Propionat...mol.g.      | -0.190567592 | 0.020776887 | 0.024612609 |
| k_Bacteria p_Bacteroidetes c_Bacteroidia o_Bacteroidales f_Porphyrimonadaceae g_Parabacteroides                  | Propionat...mol.g.      | -0.189390669 | 0.021591931 | 0.025493145 |
| k_Bacteria p_Firmicutes c_Clostridia o_Clostridiales f_[Veillonellaceae/Clostridiaceae]                          | Chromogranin.A..nmol.g. | 0.18815547   | 0.022015786 | 0.025652682 |
| k_Bacteria p_Actinobacteria c_Coriobacteriia o_Coriobacteriales f_Coriobacteriaceae g_Slackia                    | Beta.Defensin.2..ng.g.  | 0.188339221  | 0.021884141 | 0.025652682 |
| k_Bacteria p_Bacteroidetes c_Bacteroidia o_Bacteroidales f_Bacteroidaceae g_Bacteroides s_eggerthii              | Beta.Defensin.2..ng.g.  | 0.188194093  | 0.021988059 | 0.025652682 |
| k_Bacteria p_Bacteroidetes c_Bacteroidia o_Bacteroidales f_Bacteroidaceae g_Bacteroides s_plebeius               | Acetat...mol.g.         | 0.188850909  | 0.021974847 | 0.025652682 |
| k_Bacteria p_Proteobacteria c_Betaproteobacteria o_Burkholderiales                                               | Butyrat...mol.g.        | 0.188417063  | 0.022286848 | 0.025883659 |
| k_Bacteria p_Firmicutes c_Clostridia o_Clostridiales f_[Ruminococcaceae/Clostridiaceae]                          | Valerat...mol.g.        | -0.188153666 | 0.022478125 | 0.02602077  |
| k_Bacteria p_Firmicutes c_Clostridia o_Clostridiales f_Veillonellaceae g_Mitsuokella                             | Beta.Defensin.2..ng.g.  | 0.187095533  | 0.022788543 | 0.026294461 |
| k_Bacteria p_Firmicutes c_Clostridia o_Clostridiales f_Ruminococcaceae g_Ruminococcus                            | Acetat...mol.g.         | -0.187092637 | 0.023263004 | 0.026668743 |
| k_Bacteria p_Lentisphaerae c_Lentisphaeria o_Victivallales f_Victivallaceae                                      | Caproat...mol.g.        | 0.187166959  | 0.023207269 | 0.026668743 |
| k_Bacteria p_Firmicutes c_Clostridia o_Clostridiales f_Lachnospiraceae                                           | Calprotectin...g.g.     | 0.186235145  | 0.023432857 | 0.026765061 |
| k_Bacteria p_Firmicutes c_Clostridia o_Clostridiales f_Ruminococcaceae                                           | Calprotectin...g.g.     | -0.186149755 | 0.023497649 | 0.026765061 |
| k_Bacteria p_Bacteroidetes c_Bacteroidia o_Bacteroidales f_Odoribacteraceae g_Odoribacter                        | Butyrat...mol.g.        | 0.186492623  | 0.023717192 | 0.026928822 |
| k_Bacteria p_Firmicutes c_Clostridia o_Clostridiales f_[Ruminococcaceae/Lachnospiraceae]                         | Beta.Defensin.2..ng.g.  | 0.185369014  | 0.024097217 | 0.027273173 |

|                                                                                                                        |                         |              |             |             |
|------------------------------------------------------------------------------------------------------------------------|-------------------------|--------------|-------------|-------------|
| k_Bacteria p_Firmicutes c_Clostridia o_Clostridiales f_Lachnospiraceae g_Ruminococcus s_gnavus                         | Valerat...mol.g.        | -0.185776664 | 0.024269088 | 0.027380497 |
| k_Bacteria p_Firmicutes c_Clostridia o_Clostridiales f_Lachnospiraceae g_Blautia                                       | Acetat...mol.g.         | -0.185120295 | 0.024784693 | 0.027873717 |
| k_Bacteria p_Bacteroidetes c_Bacteroidia o_Bacteroidales f_Bacteroidaceae g_Bacteroides s_uniformis                    | Acetat...mol.g.         | 0.184325738  | 0.025421386 | 0.028499576 |
| k_Bacteria p_Actinobacteria c_Actinobacteria o_Bifidobacteriales f_Bifidobacteriaceae g_Bifidobacterium s_adolescentis | Propionat...mol.g.      | 0.183734341  | 0.02590433  | 0.028949673 |
| k_Bacteria p_Firmicutes c_Clostridia o_Clostridiales f_Ruminococcaceae                                                 | Beta.Defensin.2..ng.g.  | -0.181897773 | 0.026924451 | 0.029995396 |
| k_Bacteria p_Firmicutes c_Clostridia o_Clostridiales f_Ruminococcaceae g_Ruminococcus s_bromii                         | Valerat...mol.g.        | -0.182372349 | 0.027046493 | 0.030037197 |
| k_Bacteria p_Tenericutes c_RF3 o_ML615J-28                                                                             | Butyrat...mol.g.        | -0.18225752  | 0.027144725 | 0.030052378 |
| k_Bacteria p_Bacteroidetes c_Bacteroidia o_Bacteroidales f_Porphyrmonadaceae g_Parabacteroides s_gordonii              | Butyrat...mol.g.        | -0.181991211 | 0.027373716 | 0.03021178  |
| k_Bacteria p_Firmicutes c_Clostridia o_Clostridiales f_Ruminococcaceae g_Faecalibacterium s_prausnitzii                | Acetat...mol.g.         | 0.181828142  | 0.027514746 | 0.030273415 |
| k_Bacteria p_Firmicutes c_Clostridia o_Clostridiales f_[Veillonellaceae/Lachnospiraceae]                               | Caproat...mol.g.        | -0.180334573 | 0.028835567 | 0.031628742 |
| k_Bacteria p_Bacteroidetes c_Bacteroidia o_Bacteroidales f_Paraprevotellaceae g_Prevotella                             | Propionat...mol.g.      | 0.179911044  | 0.0292198   | 0.031951578 |
| k_Bacteria p_Bacteroidetes c_Bacteroidia o_Bacteroidales f_Porphyrmonadaceae g_Parabacteroides s_gordonii              | Acetat...mol.g.         | -0.179753759 | 0.029363598 | 0.032010326 |
| k_Bacteria p_Firmicutes c_Erysipelotrichi o_Erysipelotrichales f_Erysipelotrichaceae g_Catenibacterium                 | Beta.Defensin.2..ng.g.  | 0.178518284  | 0.029944541 | 0.032444587 |
| k_Bacteria p_Lentisphaerae c_Lentisphaeria o_Victivallales f_Victivallaceae                                            | Beta.Defensin.2..ng.g.  | 0.178547147  | 0.029917576 | 0.032444587 |
| k_Bacteria p_Firmicutes c_Clostridia o_Clostridiales f_Lachnospiraceae g_Roseburia s_faecis                            | Calprotectin...g.g.     | 0.178345381  | 0.030106513 | 0.032520932 |
| k_Bacteria p_Bacteroidetes c_Bacteroidia o_Bacteroidales f_Barnesiellaceae                                             | Beta.Defensin.2..ng.g.  | 0.177922731  | 0.030505579 | 0.032668337 |
| k_Bacteria p_Bacteroidetes c_Bacteroidia o_Bacteroidales f_Paraprevotellaceae                                          | Beta.Defensin.2..ng.g.  | 0.17792571   | 0.030502751 | 0.032668337 |
| k_Bacteria p_Bacteroidetes c_Bacteroidia o_Bacteroidales f_Porphyrmonadaceae g_Parabacteroides s_distasonis            | Valerat...mol.g.        | -0.178513508 | 0.030518745 | 0.032668337 |
| k_Bacteria p_Firmicutes c_Bacilli o_Lactobacillales f_Streptococcaceae g_[Streptococcus/Lactococcus]                   | Caproat...mol.g.        | 0.177992023  | 0.031015859 | 0.033100763 |
| k_Bacteria p_Firmicutes c_Clostridia o_Clostridiales f_Veillonellaceae g_Dialister                                     | Valerat...mol.g.        | 0.177415463  | 0.031573462 | 0.033594963 |
| k_Bacteria p_Firmicutes c_Clostridia o_Clostridiales f_Veillonellaceae g_Dialister                                     | Beta.Defensin.2..ng.g.  | 0.175205547  | 0.033180004 | 0.034990082 |
| k_Bacteria p_Firmicutes c_Clostridia o_Clostridiales f_Lachnospiraceae g_Anaerostipes                                  | Acetat...mol.g.         | -0.175925228 | 0.033054253 | 0.034990082 |
| k_Bacteria p_Firmicutes c_Clostridia o_Clostridiales f_Lachnospiraceae g_Anaerostipes                                  | Propionat...mol.g.      | -0.175837413 | 0.033143316 | 0.034990082 |
| k_Bacteria p_Firmicutes c_Clostridia o_Clostridiales f_Veillonellaceae g_Acidaminococcus                               | Beta.Defensin.2..ng.g.  | 0.174439136  | 0.033969328 | 0.035662412 |
| k_Bacteria p_Firmicutes c_Clostridia o_Clostridiales f_Christensenellaceae                                             | Calprotectin...g.g.     | -0.174392131 | 0.034018251 | 0.035662412 |
| k_Bacteria p_Bacteroidetes c_Bacteroidia o_Bacteroidales f_Bacteroidaceae g_Bacteroides s_caccae                       | Calprotectin...g.g.     | -0.17384517  | 0.034591927 | 0.036157156 |
| k_Bacteria p_Bacteroidetes c_Bacteroidia o_Bacteroidales f_Bacteroidaceae g_Bacteroides s_ovatus                       | Calprotectin...g.g.     | 0.172064103  | 0.036516974 | 0.038057375 |
| k_Bacteria p_Firmicutes c_Clostridia o_Clostridiales f_Veillonellaceae g_Mitsuokella                                   | Calprotectin...g.g.     | 0.171096257  | 0.03760042  | 0.039071944 |
| k_Bacteria p_Actinobacteria c_Coriobacteriia o_Coriobacteriales f_Coriobacteriaceae                                    | Chromogranin.A..nmol.g. | -0.170798883 | 0.0379387   | 0.039308526 |
| k_Bacteria p_Firmicutes c_Clostridia o_Clostridiales f_Ruminococcaceae                                                 | Caproat...mol.g.        | -0.170887701 | 0.038502605 | 0.039776824 |
| k_Bacteria p_Proteobacteria c_Gammaproteobacteria o_Aeromonadales f_Succinivibrionaceae g_Succinivibrio                | Chromogranin.A..nmol.g. | 0.169825295  | 0.039064189 | 0.040123715 |
| k_Bacteria p_Firmicutes c_Clostridia o_Clostridiales f_[Ruminococcaceae/[Mogibacteriaceae]]                            | Butyrat...mol.g.        | 0.170494116  | 0.03895839  | 0.040123715 |
| k_Bacteria p_Actinobacteria                                                                                            | Acetat...mol.g.         | -0.169512208 | 0.040115282 | 0.041084576 |
| k_Bacteria p_Firmicutes c_Clostridia o_Clostridiales f_Ruminococcaceae g_Oscillospira                                  | Valerat...mol.g.        | -0.169032842 | 0.040690468 | 0.041553908 |
| k_Bacteria p_Tenericutes c_Mollicutes o_Anaeroplasmatales f_Anaeroplasmataceae                                         | Caproat...mol.g.        | 0.168392049  | 0.041470139 | 0.042228776 |
| k_Bacteria p_Tenericutes c_Mollicutes o_Anaeroplasmatales f_Anaeroplasmataceae                                         | Chromogranin.A..nmol.g. | -0.166415592 | 0.043229509 | 0.043786647 |
| k_Bacteria p_Actinobacteria c_Coriobacteriia o_Coriobacteriales f_Coriobacteriaceae g_Eggerthella s_lenta              | Beta.Defensin.2..ng.g.  | -0.166321962 | 0.043348934 | 0.043786647 |
| k_Bacteria p_Firmicutes c_Clostridia o_Clostridiales f_Peptococcaceae g_rc4-4                                          | Calprotectin...g.g.     | -0.166305742 | 0.043369651 | 0.043786647 |
| k_Bacteria p_Firmicutes c_Clostridia o_Clostridiales f_[Veillonellaceae/Clostridiaceae]                                | Butyrat...mol.g.        | 0.166574778  | 0.043749642 | 0.044045164 |
| k_Bacteria p_Firmicutes c_Clostridia o_Clostridiales f_Peptococcaceae g_rc4-4                                          | Beta.Defensin.2..ng.g.  | -0.165351425 | 0.04460319  | 0.044737776 |
| k_Bacteria p_Actinobacteria c_Coriobacteriia o_Coriobacteriales f_Coriobacteriaceae                                    | Caproat...mol.g.        | 0.165848584  | 0.044689378 | 0.044737776 |
| k_Bacteria p_Bacteroidetes c_Bacteroidia o_Bacteroidales f_Paraprevotellaceae g_Prevotella                             | Chromogranin.A..nmol.g. | -0.16359731  | 0.046946957 | 0.046710497 |
| k_Bacteria p_Bacteroidetes c_Bacteroidia o_Bacteroidales f_Odoribacteraceae                                            | Beta.Defensin.2..ng.g.  | 0.163613965  | 0.046924231 | 0.046710497 |
| k_Bacteria p_Bacteroidetes c_Bacteroidia o_Bacteroidales f_Porphyrmonadaceae g_Parabacteroides s_distasonis            | Calprotectin...g.g.     | -0.163497688 | 0.047083088 | 0.046710497 |
| k_Bacteria p_Firmicutes c_Clostridia o_Clostridiales f_Clostridiaceae g_Clostridium                                    | Acetat...mol.g.         | 0.163952128  | 0.047223235 | 0.046710497 |

|                                                                                                                     |                     |              |             |             |
|---------------------------------------------------------------------------------------------------------------------|---------------------|--------------|-------------|-------------|
| k__Bacteria p__Firmicutes c__Erysipelotrichi o__Erysipelotrichales f__Erysipelotrichaceae                           | Valerat...mol.g.    | -0.163883484 | 0.047317148 | 0.046710497 |
| k__Bacteria p__Firmicutes c__Clostridia o__Clostridiales f__Lachnospiraceae g__Lachnospira                          | Valerat...mol.g.    | -0.161798931 | 0.050243937 | 0.049462366 |
| k__Bacteria p__Bacteroidetes c__Bacteroidia o__Bacteroidales f__Odoribacteraceae                                    | Calprotectin...g.g. | 0.160829065  | 0.050853805 | 0.049727182 |
| k__Bacteria p__Firmicutes c__Clostridia o__Clostridiales f__Ruminococcaceae g__Ruminococcus s__bromii               | Butyrat...mol.g.    | -0.161323063 | 0.050932713 | 0.049727182 |
| k__Bacteria p__Firmicutes c__Erysipelotrichi o__Erysipelotrichales f__Erysipelotrichaceae g__Eubacterium s__biforme | Caproat...mol.g.    | 0.161495661  | 0.050681995 | 0.049727182 |
