# Supplementary material for: The influence of a short-term gluten-free diet on the human gut microbiome
Source: PubMed Central journal article supplement (PMC4841035; doi:10.1186/s13073-016-0295-y), 2016-04-21
Supplement: 13073_2016_295_MOESM9_ESM.pdf [file 13073_2016_295_MOESM9_ESM.pdf]

| Kegg_Pathway                                                 | Fecal_Biomarker         | Cor(rho)     | P-val    | Q-val    |
|--------------------------------------------------------------|-------------------------|--------------|----------|----------|
| ko00380_Tryptophan_metabolism                                | Chromogranin.A..nmol.g. | -0.590626487 | 2.76E-15 | 1.30E-12 |
| ko00620_Pyruvate_metabolism                                  | Propionat...mol.g.      | -0.545109725 | 9.44E-13 | 1.48E-10 |
| ko00253_Tetracycline_biosynthesis                            | Propionat...mol.g.      | -0.548387066 | 6.48E-13 | 1.48E-10 |
| ko00680_Methane_metabolism                                   | Propionat...mol.g.      | -0.535245588 | 2.86E-12 | 3.36E-10 |
| ko00500_Starch_and_sucrose_metabolism                        | Chromogranin.A..nmol.g. | 0.523955307  | 8.27E-12 | 7.77E-10 |
| ko00630_Glyoxylate_and_dicarboxylate_metabolism              | Caproat...mol.g.        | -0.504836027 | 7.02E-11 | 5.49E-09 |
| ko00362_Benzoate_degradation                                 | Propionat...mol.g.      | -0.50247784  | 8.88E-11 | 5.96E-09 |
| ko00620_Pyruvate_metabolism                                  | Butyrat...mol.g.        | -0.498189429 | 1.36E-10 | 7.10E-09 |
| ko00670_One_carbon_pool_by_folate                            | Caproat...mol.g.        | 0.498148707  | 1.36E-10 | 7.10E-09 |
| ko00791_Atrazine_degradation                                 | Chromogranin.A..nmol.g. | -0.492550905 | 2.03E-10 | 9.55E-09 |
| ko00903_Limonene_and_pinene_degradation                      | Chromogranin.A..nmol.g. | -0.490890615 | 2.39E-10 | 1.02E-08 |
| ko00290_Valine_leucine_and_ileucine_biosynthesis             | Propionat...mol.g.      | -0.48957626  | 3.12E-10 | 1.16E-08 |
| ko00130_Ubiquinone_and_other_terpenoid<>quinone_biosynthesis | Valerat...mol.g.        | 0.489294361  | 3.20E-10 | 1.16E-08 |
| ko00253_Tetracycline_biosynthesis                            | Butyrat...mol.g.        | -0.485922503 | 4.41E-10 | 1.48E-08 |
| ko00640_Propanoate_metabolism                                | Propionat...mol.g.      | -0.48290635  | 5.85E-10 | 1.83E-08 |
| ko00540_Lipopolysaccharide_biosynthesis                      | Valerat...mol.g.        | 0.4815342    | 6.64E-10 | 1.95E-08 |
| ko00620_Pyruvate_metabolism                                  | Acetat...mol.g.         | -0.480170307 | 7.54E-10 | 2.08E-08 |
| ko05010_Alzheimer's_disease                                  | Chromogranin.A..nmol.g. | -0.476597682 | 9.17E-10 | 2.27E-08 |
| ko00790_Folate_biosynthesis                                  | Valerat...mol.g.        | 0.478543856  | 8.76E-10 | 2.27E-08 |
| ko00061_Fatty_acid_biosynthesis                              | Propionat...mol.g.      | -0.476790806 | 1.03E-09 | 2.42E-08 |
| ko00310_Lysine_degradation                                   | Chromogranin.A..nmol.g. | -0.474787466 | 1.08E-09 | 2.42E-08 |
| ko00640_Propanoate_metabolism                                | Acetat...mol.g.         | -0.470565012 | 1.81E-09 | 3.86E-08 |
| ko00633_Nitrotoluene_degradation                             | Propionat...mol.g.      | -0.468106367 | 2.25E-09 | 4.60E-08 |
| ko03010_Ribosome                                             | Caproat...mol.g.        | 0.46736397   | 2.40E-09 | 4.71E-08 |
| ko00510_N<>Glycan_biosynthesis                               | Valerat...mol.g.        | 0.465418833  | 2.86E-09 | 5.37E-08 |
| ko04974_Protein_digestion_and_absorption                     | Propionat...mol.g.      | 0.464028546  | 3.23E-09 | 5.83E-08 |
| ko00540_Lipopolysaccharide_biosynthesis                      | Propionat...mol.g.      | 0.463138409  | 3.49E-09 | 6.07E-08 |
| ko04146_Peroxisome                                           | Valerat...mol.g.        | 0.459489148  | 4.79E-09 | 8.03E-08 |
| ko00030_Pentose_phosphate_pathway                            | Valerat...mol.g.        | -0.45909434  | 4.96E-09 | 8.03E-08 |
| ko00680_Methane_metabolism                                   | Acetat...mol.g.         | -0.45833597  | 5.30E-09 | 8.29E-08 |
| ko00253_Tetracycline_biosynthesis                            | Acetat...mol.g.         | -0.455075648 | 7.00E-09 | 9.67E-08 |
| ko00622_Xylene_degradation                                   | Propionat...mol.g.      | -0.455082004 | 7.00E-09 | 9.67E-08 |
| ko00640_Propanoate_metabolism                                | Butyrat...mol.g.        | -0.455462975 | 6.78E-09 | 9.67E-08 |
| ko00240_Pyrimidine_metabolism                                | Caproat...mol.g.        | 0.456153541  | 6.39E-09 | 9.67E-08 |
| ko03060_Protein_export                                       | Chromogranin.A..nmol.g. | -0.452539208 | 7.72E-09 | 9.80E-08 |
| ko00621_Dioxin_degradation                                   | Propionat...mol.g.      | -0.454477538 | 7.37E-09 | 9.80E-08 |
| ko04141_Protein_processing_in_endoplasmic_reticulum          | Valerat...mol.g.        | 0.453982608  | 7.69E-09 | 9.80E-08 |
| ko00660_C5<>Branched_dibasic_acid_metabolism                 | Propionat...mol.g.      | -0.452732141 | 8.55E-09 | 1.06E-07 |
| ko00052_Galactose_metabolism                                 | Chromogranin.A..nmol.g. | 0.448659644  | 1.07E-08 | 1.29E-07 |
| ko03440_Homologous_recombination                             | Caproat...mol.g.        | 0.44914154   | 1.16E-08 | 1.36E-07 |
| ko00920_Sulfur_metabolism                                    | Chromogranin.A..nmol.g. | 0.44632006   | 1.30E-08 | 1.48E-07 |
| ko00061_Fatty_acid_biosynthesis                              | Butyrat...mol.g.        | -0.447509398 | 1.32E-08 | 1.48E-07 |
| ko00130_Ubiquinone_and_other_terpenoid<>quinone_biosynthesis | Propionat...mol.g.      | 0.446305907  | 1.46E-08 | 1.60E-07 |
| ko00630_Glyoxylate_and_dicarboxylate_metabolism              | Chromogranin.A..nmol.g. | 0.443902737  | 1.60E-08 | 1.70E-07 |
| ko00900_Terpenoid_backbone_biosynthesis                      | Caproat...mol.g.        | 0.444986584  | 1.63E-08 | 1.70E-07 |
| ko00625_Chloroalkane_and_chloroalkene_degradation            | Butyrat...mol.g.        | -0.444563659 | 1.69E-08 | 1.73E-07 |
| ko00330_Arginine_and_proline_metabolism                      | Valerat...mol.g.        | -0.443674138 | 1.82E-08 | 1.82E-07 |
| ko03030_DNA_replication                                      | Chromogranin.A..nmol.g. | -0.439973198 | 2.20E-08 | 2.16E-07 |
| ko00650_Butanoate_metabolism                                 | Propionat...mol.g.      | -0.440873265 | 2.29E-08 | 2.19E-07 |
| ko00040_Pentose_and_glucuronate_interconversions             | Beta.Defensin.2..ng.g.  | -0.438944618 | 2.40E-08 | 2.21E-07 |
| ko00625_Chloroalkane_and_chloroalkene_degradation            | Acetat...mol.g.         | -0.440481644 | 2.36E-08 | 2.21E-07 |
| ko04122_Sulfur_relay_system                                  | Valerat...mol.g.        | -0.438768311 | 2.72E-08 | 2.45E-07 |
| ko00250_Alanine_aspartate_and_glutamate_metabolism           | Chromogranin.A..nmol.g. | 0.435142656  | 3.26E-08 | 2.79E-07 |
| ko00630_Glyoxylate_and_dicarboxylate_metabolism              | Valerat...mol.g.        | -0.436890609 | 3.16E-08 | 2.79E-07 |
| ko03030_DNA_replication                                      | Caproat...mol.g.        | 0.436681302  | 3.21E-08 | 2.79E-07 |
| ko05012_Parkinson's_disease                                  | Chromogranin.A..nmol.g. | -0.434434645 | 3.45E-08 | 2.90E-07 |
| ko00908_Zeatin_biosynthesis                                  | Propionat...mol.g.      | 0.433952124  | 4.00E-08 | 3.29E-07 |
| ko00460_Cyanoamino_acid_metabolism                           | Chromogranin.A..nmol.g. | 0.431581052  | 4.34E-08 | 3.45E-07 |
| ko04910_Insulin_signaling_pathway                            | Valerat...mol.g.        | -0.433099314 | 4.28E-08 | 3.45E-07 |
| ko00290_Valine_leucine_and_ileucine_biosynthesis             | Valerat...mol.g.        | -0.429551704 | 5.66E-08 | 4.36E-07 |
| ko00040_Pentose_and_glucuronate_interconversions             | Caproat...mol.g.        | -0.429744482 | 5.58E-08 | 4.36E-07 |
| ko00625_Chloroalkane_and_chloroalkene_degradation            | Propionat...mol.g.      | -0.429286399 | 5.78E-08 | 4.38E-07 |
| ko03018_RNA_degradation                                      | Valerat...mol.g.        | 0.428809313  | 6.00E-08 | 4.47E-07 |
| ko03010_Ribosome                                             | Chromogranin.A..nmol.g. | -0.426033794 | 6.72E-08 | 4.92E-07 |
| ko00680_Methane_metabolism                                   | Butyrat...mol.g.        | -0.4272022   | 6.80E-08 | 4.92E-07 |
| ko00908_Zeatin_biosynthesis                                  | Valerat...mol.g.        | 0.426451796  | 7.21E-08 | 5.13E-07 |

|                                                     |                         |              |          |          |
|-----------------------------------------------------|-------------------------|--------------|----------|----------|
| ko03060_Protein_export                              | Caproat...mol.g.        | 0.425625864  | 7.69E-08 | 5.39E-07 |
| ko00020_Citrate_cycle_[TCA_cycle]                   | Valerat...mol.g.        | 0.423943556  | 8.76E-08 | 6.05E-07 |
| ko02020_Two<>component_system                       | Valerat...mol.g.        | -0.421470407 | 1.06E-07 | 7.21E-07 |
| ko04112_Cell_cycle_<>_Caulobacter                   | Caproat...mol.g.        | 0.420926972  | 1.10E-07 | 7.41E-07 |
| ko00670_One_carbon_pool_by_folate                   | Valerat...mol.g.        | 0.418676523  | 1.31E-07 | 8.67E-07 |
| ko03420_Nucleotide_excision_repair                  | Caproat...mol.g.        | 0.418450886  | 1.33E-07 | 8.70E-07 |
| ko00621_Dioxin_degradation                          | Butyrat...mol.g.        | -0.417474041 | 1.44E-07 | 9.24E-07 |
| ko00230_Purine_metabolism                           | Caproat...mol.g.        | 0.416838596  | 1.51E-07 | 9.56E-07 |
| ko00520_Amino_sugar_and_nucleotide_sugar_metabolism | Chromogranin.A..nmol.g. | 0.414432507  | 1.64E-07 | 1.02E-06 |
| ko00660_C5<>Branched_dibasic_acid_metabolism        | Valerat...mol.g.        | -0.414101277 | 1.85E-07 | 1.14E-06 |
| ko03430_Mismatch_repair                             | Caproat...mol.g.        | 0.413338053  | 1.96E-07 | 1.19E-06 |
| ko00622_Xylene_degradation                          | Butyrat...mol.g.        | -0.413148316 | 1.99E-07 | 1.20E-06 |
| ko00591_Linoleic_acid_metabolism                    | Caproat...mol.g.        | -0.411243776 | 2.29E-07 | 1.36E-06 |
| ko04910_Insulin_signaling_pathway                   | Chromogranin.A..nmol.g. | 0.409562309  | 2.36E-07 | 1.37E-06 |
| ko04115_p53_signaling_pathway                       | Chromogranin.A..nmol.g. | -0.409565904 | 2.35E-07 | 1.37E-06 |
| ko05145_Toxoplasmosis                               | Chromogranin.A..nmol.g. | -0.409185329 | 2.42E-07 | 1.39E-06 |
| ko00565_Ether_lipid_metabolism                      | Chromogranin.A..nmol.g. | 0.408709486  | 2.51E-07 | 1.42E-06 |
| ko03060_Protein_export                              | Valerat...mol.g.        | 0.408419057  | 2.82E-07 | 1.57E-06 |
| ko00040_Pentose_and_glucuronate_interconversions    | Valerat...mol.g.        | -0.408320827 | 2.84E-07 | 1.57E-06 |
| ko00561_Glycerolipid_metabolism                     | Propionat...mol.g.      | -0.40735749  | 3.04E-07 | 1.66E-06 |
| ko00920_Sulfur_metabolism                           | Caproat...mol.g.        | -0.406495741 | 3.24E-07 | 1.75E-06 |
| ko00780_Biotin_metabolism                           | Propionat...mol.g.      | 0.406167447  | 3.32E-07 | 1.77E-06 |
| ko00510_N<>Glycan_biosynthesis                      | Propionat...mol.g.      | 0.405496867  | 3.49E-07 | 1.84E-06 |
| ko00300_Lysine_biosynthesis                         | Propionat...mol.g.      | -0.404850843 | 3.65E-07 | 1.91E-06 |
| ko03030_DNA_replication                             | Beta.Defensin.2..ng.g.  | 0.402854554  | 3.85E-07 | 1.99E-06 |
| ko00790_Folate_biosynthesis                         | Beta.Defensin.2..ng.g.  | 0.40155703   | 4.23E-07 | 2.14E-06 |
| ko00780_Biotin_metabolism                           | Butyrat...mol.g.        | 0.402934693  | 4.20E-07 | 2.14E-06 |
| ko00900_Terpenoid_backbone_biosynthesis             | Beta.Defensin.2..ng.g.  | 0.400439048  | 4.59E-07 | 2.29E-06 |
| ko00230_Purine_metabolism                           | Beta.Defensin.2..ng.g.  | 0.399526524  | 4.90E-07 | 2.42E-06 |
| ko00760_Nicotinate_and_nicotinamide_metabolism      | Valerat...mol.g.        | 0.40058088   | 4.97E-07 | 2.43E-06 |
| ko00330_Arginine_and_proline_metabolism             | Propionat...mol.g.      | -0.400137894 | 5.13E-07 | 2.48E-06 |
| ko00480_Glutathione_metabolism                      | Valerat...mol.g.        | 0.398197482  | 5.89E-07 | 2.82E-06 |
| ko00362_Benzoate_degradation                        | Butyrat...mol.g.        | -0.396583999 | 6.60E-07 | 3.13E-06 |
| ko04974_Protein_digestion_and_absorption            | Valerat...mol.g.        | 0.396312598  | 6.73E-07 | 3.16E-06 |
| ko00760_Nicotinate_and_nicotinamide_metabolism      | Beta.Defensin.2..ng.g.  | 0.394542247  | 6.98E-07 | 3.25E-06 |
| ko00230_Purine_metabolism                           | Valerat...mol.g.        | 0.395329925  | 7.21E-07 | 3.32E-06 |
| ko00660_C5<>Branched_dibasic_acid_metabolism        | Acetat...mol.g.         | -0.394115553 | 7.85E-07 | 3.58E-06 |
| ko00790_Folate_biosynthesis                         | Caproat...mol.g.        | 0.393969772  | 7.93E-07 | 3.58E-06 |
| ko00480_Glutathione_metabolism                      | Propionat...mol.g.      | 0.393732439  | 8.07E-07 | 3.61E-06 |
| ko00471_D<>Glutamine_and_D<>glutamate_metabolism    | Caproat...mol.g.        | 0.393502907  | 8.20E-07 | 3.63E-06 |
| ko00590_Arachidonic_acid_metabolism                 | Valerat...mol.g.        | 0.393057415  | 8.45E-07 | 3.68E-06 |
| ko04141_Protein_processing_in_endoplasmic_reticulum | Caproat...mol.g.        | 0.393124879  | 8.42E-07 | 3.68E-06 |
| ko00061_Fatty_acid_biosynthesis                     | Acetat...mol.g.         | -0.39202334  | 9.09E-07 | 3.89E-06 |
| ko03013_RNA_transport                               | Valerat...mol.g.        | -0.391976886 | 9.12E-07 | 3.89E-06 |
| ko00760_Nicotinate_and_nicotinamide_metabolism      | Caproat...mol.g.        | 0.390322168  | 1.02E-06 | 4.33E-06 |
| ko03440_Homologous_recombination                    | Beta.Defensin.2..ng.g.  | 0.388743177  | 1.05E-06 | 4.39E-06 |
| ko00970_Aminoacyl<>tRNA_biosynthesis                | Caproat...mol.g.        | 0.389732075  | 1.06E-06 | 4.43E-06 |
| ko00630_Glyoxylate_and_dicarboxylate_metabolism     | Beta.Defensin.2..ng.g.  | -0.387587817 | 1.13E-06 | 4.59E-06 |
| ko00621_Dioxin_degradation                          | Acetat...mol.g.         | -0.388996506 | 1.12E-06 | 4.59E-06 |
| ko00010_Glycolysis/_Gluconeogenesis                 | Propionat...mol.g.      | -0.388704033 | 1.14E-06 | 4.59E-06 |
| ko00281_Geraniol_degradation                        | Valerat...mol.g.        | 0.388782526  | 1.14E-06 | 4.59E-06 |
| ko00622_Xylene_degradation                          | Acetat...mol.g.         | -0.387347456 | 1.25E-06 | 4.99E-06 |
| ko04210_Apoptosis                                   | Chromogranin.A..nmol.g. | -0.385985662 | 1.27E-06 | 5.00E-06 |
| ko04122_Sulfur_relay_system                         | Caproat...mol.g.        | -0.385810031 | 1.39E-06 | 5.45E-06 |
| ko00780_Biotin_metabolism                           | Acetat...mol.g.         | 0.384013464  | 1.57E-06 | 6.11E-06 |
| ko00790_Folate_biosynthesis                         | Propionat...mol.g.      | 0.382353358  | 1.76E-06 | 6.78E-06 |
| ko00071_Fatty_acid_metabolism                       | Propionat...mol.g.      | -0.381074534 | 1.92E-06 | 7.27E-06 |
| ko00561_Glycerolipid_metabolism                     | Valerat...mol.g.        | -0.381126263 | 1.91E-06 | 7.27E-06 |
| ko00670_One_carbon_pool_by_folate                   | Beta.Defensin.2..ng.g.  | 0.379045625  | 2.03E-06 | 7.62E-06 |
| ko05110_Vibrio_cholerae_infection                   | Chromogranin.A..nmol.g. | -0.378121649 | 2.16E-06 | 7.92E-06 |
| ko03060_Protein_export                              | Beta.Defensin.2..ng.g.  | 0.378105337  | 2.16E-06 | 7.92E-06 |
| ko00520_Amino_sugar_and_nucleotide_sugar_metabolism | Calprotectin...g.g.     | 0.378294284  | 2.13E-06 | 7.92E-06 |
| ko04976_Bile_secretion                              | Chromogranin.A..nmol.g. | -0.377769999 | 2.21E-06 | 7.98E-06 |
| ko05146_Amoebiasis                                  | Chromogranin.A..nmol.g. | -0.377646854 | 2.23E-06 | 7.98E-06 |
| ko00362_Benzoate_degradation                        | Valerat...mol.g.        | -0.378951982 | 2.21E-06 | 7.98E-06 |
| ko00740_Riboflavin_metabolism                       | Acetat...mol.g.         | 0.378106727  | 2.34E-06 | 8.32E-06 |
| ko03070_Bacterial_secretion_system                  | Chromogranin.A..nmol.g. | -0.376493475 | 2.40E-06 | 8.42E-06 |

|                                                              |                         |              |          |          |
|--------------------------------------------------------------|-------------------------|--------------|----------|----------|
| ko03430_Mismatch_repair                                      | Beta.Defensin.2..ng.g.  | 0.376598653  | 2.39E-06 | 8.42E-06 |
| ko00940_Phenylpropanoid_biosynthesis                         | Chromogranin.A..nmol.g. | 0.376265809  | 2.44E-06 | 8.49E-06 |
| ko03440_Homologous_recombination                             | Chromogranin.A..nmol.g. | -0.37550172  | 2.57E-06 | 8.87E-06 |
| ko00290_Valine_leucine_and_ileucine_biosynthesis             | Acetat...mol.g.         | -0.376370785 | 2.62E-06 | 9.00E-06 |
| ko00253_Tetracycline_biosynthesis                            | Valerat...mol.g.        | -0.375940858 | 2.70E-06 | 9.19E-06 |
| ko00240_Pyrimidine_metabolism                                | Beta.Defensin.2..ng.g.  | 0.374073941  | 2.82E-06 | 9.53E-06 |
| ko00640_Propanoate_metabolism                                | Chromogranin.A..nmol.g. | -0.373024819 | 3.02E-06 | 1.01E-05 |
| ko03050_Proteasome                                           | Chromogranin.A..nmol.g. | -0.371716856 | 3.29E-06 | 1.09E-05 |
| ko03013_RNA_transport                                        | Propionat...mol.g.      | -0.372957683 | 3.28E-06 | 1.09E-05 |
| ko00240_Pyrimidine_metabolism                                | Chromogranin.A..nmol.g. | -0.371394144 | 3.36E-06 | 1.10E-05 |
| ko00983_Drug_metabolism_<>_other_enzymes                     | Caproat...mol.g.        | 0.371855467  | 3.53E-06 | 1.15E-05 |
| ko03008_Ribosome_biogenesis_in_eukaryotes                    | Chromogranin.A..nmol.g. | -0.370198439 | 3.64E-06 | 1.18E-05 |
| ko00052_Galactose_metabolism                                 | Caproat...mol.g.        | -0.371074487 | 3.71E-06 | 1.19E-05 |
| ko00130_Ubiquinone_and_other_terpenoid<>quinone_biosynthesis | Caproat...mol.g.        | 0.370942177  | 3.74E-06 | 1.20E-05 |
| ko00642_Ethylbenzene_degradation                             | Butyrat...mol.g.        | -0.370582424 | 3.83E-06 | 1.22E-05 |
| ko00600_Sphingolipid_metabolism                              | Chromogranin.A..nmol.g. | 0.368973119  | 3.94E-06 | 1.24E-05 |
| ko00330_Arginine_and_proline_metabolism                      | Caproat...mol.g.        | -0.36857572  | 4.36E-06 | 1.37E-05 |
| ko05143_African_trypanosomiasis                              | Chromogranin.A..nmol.g. | -0.366903652 | 4.50E-06 | 1.40E-05 |
| ko00513_Various_types_of_N<>glycan_biosynthesis              | Chromogranin.A..nmol.g. | -0.365638261 | 4.88E-06 | 1.50E-05 |
| ko03015_mRNA_surveillance_pathway                            | Chromogranin.A..nmol.g. | -0.365638261 | 4.88E-06 | 1.50E-05 |
| ko00280_Valine_leucine_and_ileucine_degradation              | Chromogranin.A..nmol.g. | -0.36425323  | 5.34E-06 | 1.62E-05 |
| ko00440_Phosphonate_and_phosphinate_metabolism               | Caproat...mol.g.        | -0.365449426 | 5.33E-06 | 1.62E-05 |
| ko00300_Lysine_biosynthesis                                  | Valerat...mol.g.        | -0.365239469 | 5.40E-06 | 1.63E-05 |
| ko00633_Nitrotoluene_degradation                             | Acetat...mol.g.         | -0.364659314 | 5.60E-06 | 1.67E-05 |
| ko05010_Alzheimer's_disease                                  | Caproat...mol.g.        | 0.364719831  | 5.58E-06 | 1.67E-05 |
| ko04112_Cell_cycle_<>_Caulobacter                            | Valerat...mol.g.        | 0.364009706  | 5.84E-06 | 1.72E-05 |
| ko00620_Pyruvate_metabolism                                  | Valerat...mol.g.        | -0.362470142 | 6.43E-06 | 1.87E-05 |
| ko03030_DNA_replication                                      | Valerat...mol.g.        | 0.362540036  | 6.41E-06 | 1.87E-05 |
| ko00363_Bisphenol_degradation                                | Caproat...mol.g.        | -0.362419529 | 6.45E-06 | 1.87E-05 |
| ko03410_Base_excision_repair                                 | Chromogranin.A..nmol.g. | -0.360286673 | 6.86E-06 | 1.98E-05 |
| ko00970_Aminoacyl<>tRNA_biosynthesis                         | Chromogranin.A..nmol.g. | -0.360092325 | 6.95E-06 | 1.98E-05 |
| ko03020_RNA_polymerase                                       | Propionat...mol.g.      | -0.361295258 | 6.93E-06 | 1.98E-05 |
| ko00410_beta<>Alanine_metabolism                             | Valerat...mol.g.        | 0.360037063  | 7.50E-06 | 2.12E-05 |
| ko00190_Oxidative_phosphorylation                            | Valerat...mol.g.        | 0.359717816  | 7.65E-06 | 2.15E-05 |
| ko00626_Naphthalene_degradation                              | Butyrat...mol.g.        | -0.359422431 | 7.79E-06 | 2.18E-05 |
| ko00624_Polycyclic_aromatic_hydrocarbon_degradation          | Chromogranin.A..nmol.g. | 0.357910402  | 7.97E-06 | 2.21E-05 |
| ko00072_Synthesis_and_degradation_of_ketone_bodies           | Propionat...mol.g.      | -0.357961248 | 8.53E-06 | 2.36E-05 |
| ko02020_Two<>component_system                                | Propionat...mol.g.      | -0.357623125 | 8.71E-06 | 2.39E-05 |
| ko03018_RNA_degradation                                      | Beta.Defensin.2..ng.g.  | 0.355303331  | 9.37E-06 | 2.54E-05 |
| ko00510_N<>Glycan_biosynthesis                               | Caproat...mol.g.        | 0.356448572  | 9.37E-06 | 2.54E-05 |
| ko00040_Pentose_and_glucuronate_interconversions             | Chromogranin.A..nmol.g. | 0.354617254  | 9.77E-06 | 2.63E-05 |
| ko04142_Lysosome                                             | Propionat...mol.g.      | 0.35563783   | 9.85E-06 | 2.63E-05 |
| ko02020_Two<>component_system                                | Caproat...mol.g.        | -0.355722757 | 9.80E-06 | 2.63E-05 |
| ko00071_Fatty_acid_metabolism                                | Chromogranin.A..nmol.g. | -0.354389589 | 9.91E-06 | 2.63E-05 |
| ko00440_Phosphonate_and_phosphinate_metabolism               | Valerat...mol.g.        | -0.35467409  | 1.05E-05 | 2.76E-05 |
| ko00240_Pyrimidine_metabolism                                | Valerat...mol.g.        | 0.354147049  | 1.08E-05 | 2.83E-05 |
| ko02010_ABC_transporters                                     | Valerat...mol.g.        | -0.353508554 | 1.12E-05 | 2.93E-05 |
| ko00531_Glycosaminoglycan_degradation                        | Propionat...mol.g.      | 0.352983845  | 1.16E-05 | 3.01E-05 |
| ko02040_Flagellar_assembly                                   | Propionat...mol.g.      | -0.352672167 | 1.18E-05 | 3.05E-05 |
| ko00660_C5<>Branched_dibasic_acid_metabolism                 | Beta.Defensin.2..ng.g.  | -0.35087768  | 1.23E-05 | 3.14E-05 |
| ko04626_Plant<>pathogen_interaction                          | Valerat...mol.g.        | -0.352030716 | 1.23E-05 | 3.14E-05 |
| ko03022_Basal_transcription_factors                          | Chromogranin.A..nmol.g. | -0.350469064 | 1.26E-05 | 3.20E-05 |
| ko04141_Protein_processing_in_endoplasmic_reticulum          | Propionat...mol.g.      | 0.351036329  | 1.30E-05 | 3.29E-05 |
| ko00720_Carbon_fixation_pathways_in_prokaryotes              | Valerat...mol.g.        | 0.350914908  | 1.31E-05 | 3.30E-05 |
| ko03010_Ribosome                                             | Beta.Defensin.2..ng.g.  | 0.349617175  | 1.33E-05 | 3.32E-05 |
| ko04122_Sulfur_relay_system                                  | Propionat...mol.g.      | -0.349959624 | 1.39E-05 | 3.46E-05 |
| ko00471_D<>Glutamine_and_D<>glutamate_metabolism             | Beta.Defensin.2..ng.g.  | 0.348027198  | 1.46E-05 | 3.61E-05 |
| ko00591_Linoleic_acid_metabolism                             | Valerat...mol.g.        | -0.348908751 | 1.48E-05 | 3.65E-05 |
| ko00908_Zeatin_biosynthesis                                  | Beta.Defensin.2..ng.g.  | 0.347388616  | 1.52E-05 | 3.72E-05 |
| ko04626_Plant<>pathogen_interaction                          | Propionat...mol.g.      | -0.34802566  | 1.56E-05 | 3.81E-05 |
| ko04112_Cell_cycle_<>_Caulobacter                            | Beta.Defensin.2..ng.g.  | 0.346659337  | 1.59E-05 | 3.84E-05 |
| ko00010_Glycolysis/_Gluconeogenesis                          | Acetat...mol.g.         | -0.347367894 | 1.63E-05 | 3.92E-05 |
| ko03010_Ribosome                                             | Valerat...mol.g.        | 0.346902595  | 1.67E-05 | 4.01E-05 |
| ko00660_C5<>Branched_dibasic_acid_metabolism                 | Butyrat...mol.g.        | -0.346273359 | 1.74E-05 | 4.14E-05 |
| ko04910_Insulin_signaling_pathway                            | Beta.Defensin.2..ng.g.  | -0.343966187 | 1.87E-05 | 4.42E-05 |
| ko03018_RNA_degradation                                      | Caproat...mol.g.        | 0.344569032  | 1.92E-05 | 4.54E-05 |
| ko00720_Carbon_fixation_pathways_in_prokaryotes              | Chromogranin.A..nmol.g. | -0.34320808  | 1.95E-05 | 4.58E-05 |



|                                                    |                         |              |             |             |
|----------------------------------------------------|-------------------------|--------------|-------------|-------------|
| ko00290_Valine_leucine_and_ileucine_biosynthesis   | Butyrat...mol.g.        | -0.343934823 | 2.00E-05    | 4.67E-05    |
| ko04910_Insulin_signaling_pathway                  | Caproat...mol.g.        | -0.343824316 | 2.01E-05    | 4.67E-05    |
| ko00510_N<>Glycan_biosynthesis                     | Beta.Defensin.2..ng.g.  | 0.342478013  | 2.04E-05    | 4.70E-05    |
| ko02040_Flagellar_assembly                         | Valerat...mol.g.        | -0.34348344  | 2.05E-05    | 4.70E-05    |
| ko02030_Bacterial_chemotaxis                       | Valerat...mol.g.        | -0.343460771 | 2.05E-05    | 4.70E-05    |
| ko00030_Pentose_phosphate_pathway                  | Beta.Defensin.2..ng.g.  | -0.342211474 | 2.07E-05    | 4.72E-05    |
| ko05143_African_trypanosomiasis                    | Acetat...mol.g.         | -0.342974664 | 2.11E-05    | 4.79E-05    |
| ko02030_Bacterial_chemotaxis                       | Propionat...mol.g.      | -0.342641802 | 2.16E-05    | 4.85E-05    |
| ko03410_Base_excision_repair                       | Caproat...mol.g.        | 0.342631637  | 2.16E-05    | 4.85E-05    |
| ko00030_Pentose_phosphate_pathway                  | Propionat...mol.g.      | -0.342383015 | 2.19E-05    | 4.89E-05    |
| ko00330_Arginine_and_proline_metabolism            | Beta.Defensin.2..ng.g.  | -0.341117556 | 2.21E-05    | 4.92E-05    |
| ko04112_Cell_cycle_<>_Caulobacter                  | Chromogranin.A..nmol.g. | -0.340883304 | 2.24E-05    | 4.96E-05    |
| ko00190_Oxidative_phosphorylation                  | Chromogranin.A..nmol.g. | -0.340353936 | 2.31E-05    | 5.09E-05    |
| ko00281_Geraniol_degradation                       | Propionat...mol.g.      | 0.341151414  | 2.35E-05    | 5.16E-05    |
| ko03020_RNA_polymerase                             | Butyrat...mol.g.        | -0.340948373 | 2.38E-05    | 5.20E-05    |
| ko00072_Synthesis_and_degradation_of_ketone_bodies | Valerat...mol.g.        | -0.339593914 | 2.58E-05    | 5.60E-05    |
| ko00500_Starch_and_sucrose_metabolism              | Valerat...mol.g.        | -0.339099307 | 2.65E-05    | 5.71E-05    |
| ko00590_Arachidonic_acid_metabolism                | Caproat...mol.g.        | 0.339149996  | 2.64E-05    | 5.71E-05    |
| ko00430_Taurine_and_hypotaurine_metabolism         | Valerat...mol.g.        | 0.338265922  | 2.78E-05    | 5.97E-05    |
| ko00511_Other_glycan_degradation                   | Propionat...mol.g.      | 0.337288814  | 2.95E-05    | 6.29E-05    |
| ko04122_Sulfur_relay_system                        | Beta.Defensin.2..ng.g.  | -0.335899693 | 3.00E-05    | 6.37E-05    |
| ko00020_Citrate_cycle_[TCA_cycle]                  | Caproat...mol.g.        | 0.336843396  | 3.02E-05    | 6.39E-05    |
| ko00430_Taurine_and_hypotaurine_metabolism         | Chromogranin.A..nmol.g. | -0.335506333 | 3.07E-05    | 6.45E-05    |
| ko00450_Selenocompound_metabolism                  | Butyrat...mol.g.        | 0.33652631   | 3.08E-05    | 6.45E-05    |
| ko00362_Benzoate_degradation                       | Acetat...mol.g.         | -0.336406335 | 3.10E-05    | 6.47E-05    |
| ko00740_Riboflavin_metabolism                      | Butyrat...mol.g.        | 0.336055959  | 3.16E-05    | 6.54E-05    |
| ko03008_Ribosome_biogenesis_in_eukaryotes          | Caproat...mol.g.        | 0.336059614  | 3.16E-05    | 6.54E-05    |
| ko00983_Drug_metabolism_<>_other_enzymes           | Valerat...mol.g.        | 0.335551694  | 3.26E-05    | 6.71E-05    |
| ko00623_Toluene_degradation                        | Valerat...mol.g.        | 0.334327282  | 3.49E-05    | 7.16E-05    |
| ko04210_Apoptosis                                  | Caproat...mol.g.        | 0.334081587  | 3.54E-05    | 7.23E-05    |
| ko00680_Methane_metabolism                         | Valerat...mol.g.        | -0.3339967   | 3.56E-05    | 7.24E-05    |
| ko00051_Fructose_and_mannose_metabolism            | Valerat...mol.g.        | -0.333810945 | 3.60E-05    | 7.28E-05    |
| ko00500_Starch_and_sucrose_metabolism              | Caproat...mol.g.        | -0.333639603 | 3.63E-05    | 7.32E-05    |
| ko00626_Naphthalene_degradation                    | Acetat...mol.g.         | -0.332171316 | 3.95E-05    | 7.91E-05    |
| ko00071_Fatty_acid_metabolism                      | Butyrat...mol.g.        | -0.332149583 | 3.96E-05    | 7.91E-05    |
| ko00460_Cyanoamino_acid_metabolism                 | Butyrat...mol.g.        | 0.331932352  | 4.01E-05    | 7.97E-05    |
| ko00540_Lipopolysaccharide_biosynthesis            | Caproat...mol.g.        | 0.331472241  | 4.11E-05    | 8.15E-05    |
| ko03440_Homologous_recombination                   | Valerat...mol.g.        | 0.330715757  | 4.29E-05    | 8.47E-05    |
| ko03420_Nucleotide_excision_repair                 | Beta.Defensin.2..ng.g.  | 0.328954882  | 4.46E-05    | 8.77E-05    |
| ko00550_Peptidoglycan_biosynthesis                 | Caproat...mol.g.        | 0.329940593  | 4.48E-05    | 8.77E-05    |
| ko00540_Lipopolysaccharide_biosynthesis            | Acetat...mol.g.         | 0.329802577  | 4.52E-05    | 8.80E-05    |
| ko00471_D<>Glutamine_and_D<>glutamate_metabolism   | Valerat...mol.g.        | 0.328473159  | 4.87E-05    | 9.45E-05    |
| ko00052_Galactose_metabolism                       | Beta.Defensin.2..ng.g.  | -0.326722621 | 5.06E-05    | 9.78E-05    |
| ko03430_Mismatch_repair                            | Chromogranin.A..nmol.g. | -0.325781512 | 5.33E-05    | 0.00010266  |
| ko00564_Glycerophospholipid_metabolism             | Propionat...mol.g.      | -0.326366543 | 5.48E-05    | 0.000105002 |
| ko00720_Carbon_fixation_pathways_in_prokaryotes    | Beta.Defensin.2..ng.g.  | 0.324853149  | 5.62E-05    | 0.000107247 |
| ko02060_Phosphotransferase_system_[PTS]            | Propionat...mol.g.      | -0.324645702 | 6.03E-05    | 0.0001146   |
| ko00290_Valine_leucine_and_ileucine_biosynthesis   | Beta.Defensin.2..ng.g.  | -0.323505649 | 6.06E-05    | 0.000114667 |
| ko00500_Starch_and_sucrose_metabolism              | Beta.Defensin.2..ng.g.  | -0.321869696 | 6.63E-05    | 0.000125034 |
| ko00770_Pantothenate_and_CoA_biosynthesis          | Valerat...mol.g.        | -0.322224227 | 6.89E-05    | 0.000129401 |
| ko00540_Lipopolysaccharide_biosynthesis            | Beta.Defensin.2..ng.g.  | 0.320471921  | 7.16E-05    | 0.000133964 |
| ko00621_Dioxin_degradation                         | Valerat...mol.g.        | -0.320575099 | 7.54E-05    | 0.000140506 |
| ko00450_Selenocompound_metabolism                  | Propionat...mol.g.      | 0.319639965  | 7.93E-05    | 0.00014727  |
| ko00010_Glycolysis_/Gluconeogenesis                | Butyrat...mol.g.        | -0.318834283 | 8.29E-05    | 0.000152655 |
| ko00030_Pentose_phosphate_pathway                  | Caproat...mol.g.        | -0.318883898 | 8.27E-05    | 0.000152655 |
| ko04146_Peroxisome                                 | Propionat...mol.g.      | 0.317902124  | 8.72E-05    | 0.000159935 |
| ko01040_Biosynthesis_of_unsaturated_fatty_acids    | Butyrat...mol.g.        | -0.317591346 | 8.87E-05    | 0.000162012 |
| ko03450_Non<>homologous_end<>joining               | Butyrat...mol.g.        | -0.316724312 | 9.29E-05    | 0.000169112 |
| ko00051_Fructose_and_mannose_metabolism            | Chromogranin.A..nmol.g. | 0.315067656  | 9.61E-05    | 0.000173547 |
| ko00450_Selenocompound_metabolism                  | Acetat...mol.g.         | 0.316134157  | 9.59E-05    | 0.000173547 |
| ko00531_Glycosaminoglycan_degradation              | Valerat...mol.g.        | 0.315317911  | 0.000100201 | 0.000180291 |
| ko00622_Xylene_degradation                         | Valerat...mol.g.        | -0.314756867 | 0.000103257 | 0.00018508  |
| ko04113_Meiosis_<>_yeast                           | Chromogranin.A..nmol.g. | -0.311855792 | 0.000114133 | 0.000203688 |
| ko00670_One_carbon_pool_by_folate                  | Chromogranin.A..nmol.g. | -0.311723648 | 0.00011494  | 0.000203688 |
| ko00471_D<>Glutamine_and_D<>glutamate_metabolism   | Propionat...mol.g.      | 0.312805716  | 0.000114576 | 0.000203688 |
| ko00900_Terpenoid_backbone_biosynthesis            | Valerat...mol.g.        | 0.312291675  | 0.000117745 | 0.000207875 |
| ko00623_Toluene_degradation                        | Propionat...mol.g.      | 0.312188027  | 0.000118394 | 0.000208237 |

|                                                                     |                         |              |             |             |
|---------------------------------------------------------------------|-------------------------|--------------|-------------|-------------|
| ko04974_Protein_digestion_and_absorption                            | Acetat...mol.g.         | 0.31134597   | 0.00012379  | 0.000216916 |
| ko00720_Carbon_fixation_pathways_in_prokaryotes                     | Caproat...mol.g.        | 0.311087064  | 0.000125494 | 0.000219086 |
| ko00360_Phenylalanine_metabolism                                    | Butyrat...mol.g.        | -0.311012087 | 0.000125992 | 0.00021914  |
| ko03018_RNA_degradation                                             | Chromogranin.A..nmol.g. | -0.309869009 | 0.000126834 | 0.00021979  |
| ko04146_Peroxisome                                                  | Chromogranin.A..nmol.g. | -0.308062495 | 0.000139515 | 0.000240876 |
| ko00281_Geraniol_degradation                                        | Beta.Defensin.2..ng.g.  | 0.30789093   | 0.000140779 | 0.000242168 |
| ko03018_RNA_degradation                                             | Propionat...mol.g.      | 0.308672677  | 0.00014248  | 0.0002442   |
| ko03420_Nucleotide_excision_repair                                  | Chromogranin.A..nmol.g. | -0.307362841 | 0.000144736 | 0.000247165 |
| ko00364_Fluorobenzoate_degradation                                  | Chromogranin.A..nmol.g. | -0.306435254 | 0.00015194  | 0.000258526 |
| ko00785_Lipoic_acid_metabolism                                      | Chromogranin.A..nmol.g. | -0.30408113  | 0.000171748 | 0.000289087 |
| ko00590_Arachidonic_acid_metabolism                                 | Beta.Defensin.2..ng.g.  | 0.304124222  | 0.000171365 | 0.000289087 |
| ko02060_Phosphotransferase_system_[PTS]                             | Valerat...mol.g.        | -0.305156786 | 0.000171077 | 0.000289087 |
| ko00908_Zeatin_biosynthesis                                         | Caproat...mol.g.        | 0.304679484  | 0.000175347 | 0.000294091 |
| ko00903_Limonene_and_pinene_degradation                             | Acetat...mol.g.         | -0.303138202 | 0.000189823 | 0.000317205 |
| ko03450_Non<>homologous_end<>joining                                | Propionat...mol.g.      | -0.303002026 | 0.000191154 | 0.000317205 |
| ko02010_ABC_transporters                                            | Propionat...mol.g.      | -0.303011471 | 0.000191062 | 0.000317205 |
| ko00591_Linoleic_acid_metabolism                                    | Propionat...mol.g.      | -0.302747017 | 0.00019367  | 0.000320248 |
| ko02020_Two<>component_system                                       | Beta.Defensin.2..ng.g.  | -0.301481048 | 0.000196405 | 0.000323631 |
| ko00590_Arachidonic_acid_metabolism                                 | Propionat...mol.g.      | 0.301715646  | 0.000204163 | 0.000335238 |
| ko04141_Protein_processing_in_endoplasmic_reticulum                 | Beta.Defensin.2..ng.g.  | 0.300429701  | 0.00020728  | 0.000339169 |
| ko00601_Glycosphingolipid_biosynthesis_<>_lacto_and_neolacto_series | Caproat...mol.g.        | -0.299835611 | 0.000224662 | 0.000366335 |
| ko00020_Citrate_cycle_[TCA_cycle]                                   | Propionat...mol.g.      | 0.299598407  | 0.00022738  | 0.000369484 |
| ko03420_Nucleotide_excision_repair                                  | Valerat...mol.g.        | 0.299467009  | 0.000228899 | 0.00037067  |
| ko04113_Meiosis_<>_yeast                                            | Calprotectin...g.g.     | -0.297185975 | 0.000244459 | 0.000394507 |
| ko00312_beta<>Lactam_resistance                                     | Caproat...mol.g.        | -0.29768785  | 0.000250412 | 0.00040273  |
| ko00750_Vitamin_B6_metabolism                                       | Valerat...mol.g.        | 0.29737046   | 0.000254442 | 0.000407814 |
| ko00410_beta<>Alanine_metabolism                                    | Caproat...mol.g.        | 0.297298481  | 0.000255364 | 0.0004079   |
| ko00920_Sulfur_metabolism                                           | Beta.Defensin.2..ng.g.  | -0.296192848 | 0.000257025 | 0.000409162 |
| ko00260_Glycine_serine_and_threonine_metabolism                     | Propionat...mol.g.      | 0.296645684  | 0.00026387  | 0.00041864  |
| ko00561_Glycerolipid_metabolism                                     | Acetat...mol.g.         | -0.296519332 | 0.000265547 | 0.000419881 |
| ko00480_Glutathione_metabolism                                      | Acetat...mol.g.         | 0.296050873  | 0.000271849 | 0.000428404 |
| ko00760_Nicotinate_and_nicotinamide_metabolism                      | Propionat...mol.g.      | 0.295828044  | 0.000274896 | 0.000431756 |
| ko00471_D<>Glutamine_and_D<>glutamate_metabolism                    | Butyrat...mol.g.        | 0.295403586  | 0.000280786 | 0.000439538 |
| ko00540_Lipopolysaccharide_biosynthesis                             | Butyrat...mol.g.        | 0.294914345  | 0.000287721 | 0.000448897 |
| ko03070_Bacterial_secretion_system                                  | Caproat...mol.g.        | 0.294385773  | 0.000295391 | 0.000459338 |
| ko00071_Fatty_acid_metabolism                                       | Acetat...mol.g.         | -0.293387458 | 0.000310398 | 0.00048108  |
| ko03020_RNA_polymerase                                              | Acetat...mol.g.         | -0.293073893 | 0.000315255 | 0.000487001 |
| ko04142_Lysosome                                                    | Valerat...mol.g.        | 0.292929055  | 0.000317522 | 0.000488896 |
| ko00130_Ubiquinone_and_other_terpenoid<>quinone_biosynthesis        | Beta.Defensin.2..ng.g.  | 0.29161912   | 0.000323016 | 0.000495729 |
| ko00473_D<>Alanine_metabolism                                       | Caproat...mol.g.        | 0.292510752  | 0.000324156 | 0.000495858 |
| ko00561_Glycerolipid_metabolism                                     | Butyrat...mol.g.        | -0.292360467 | 0.00032657  | 0.000497929 |
| ko01053_Biosynthesis_of_siderophore_group_nonribosomal_peptides     | Propionat...mol.g.      | 0.292189632  | 0.000329335 | 0.000500519 |
| ko05143_African_trypanosomiasis                                     | Butyrat...mol.g.        | -0.291888859 | 0.000334255 | 0.000506358 |
| ko00230_Purine_metabolism                                           | Chromogranin.A..nmol.g. | -0.290508212 | 0.000341257 | 0.000513783 |
| ko02060_Phosphotransferase_system_[PTS]                             | Acetat...mol.g.         | -0.291462621 | 0.000341344 | 0.000513783 |
| ko00440_Phosphonate_and_phosphinate_metabolism                      | Beta.Defensin.2..ng.g.  | -0.289536788 | 0.000357984 | 0.000537108 |
| ko03008_Ribosome_biogenesis_in_eukaryotes                           | Beta.Defensin.2..ng.g.  | 0.289057388  | 0.000366516 | 0.000547448 |
| ko00623_Toluene_degradation                                         | Acetat...mol.g.         | 0.289974131  | 0.000367208 | 0.000547448 |
| ko05142_Chagas_disease_[American_trypanosomiasis]                   | Calprotectin...g.g.     | -0.288817688 | 0.000370852 | 0.000551132 |
| ko00750_Vitamin_B6_metabolism                                       | Caproat...mol.g.        | 0.289377171  | 0.000378081 | 0.000560101 |
| ko00480_Glutathione_metabolism                                      | Beta.Defensin.2..ng.g.  | 0.287802436  | 0.000389749 | 0.000575572 |
| ko00190_Oxidative_phosphorylation                                   | Beta.Defensin.2..ng.g.  | 0.287454455  | 0.000396428 | 0.000582047 |
| ko00052_Galactose_metabolism                                        | Valerat...mol.g.        | -0.288395368 | 0.000396612 | 0.000582047 |
| ko00260_Glycine_serine_and_threonine_metabolism                     | Acetat...mol.g.         | 0.2875355    | 0.000413529 | 0.000604982 |
| ko03450_Non<>homologous_end<>joining                                | Acetat...mol.g.         | -0.287127488 | 0.000421787 | 0.000615147 |
| ko00511_Other_glycan_degradation                                    | Acetat...mol.g.         | 0.286602631  | 0.000432634 | 0.000629013 |
| ko00190_Oxidative_phosphorylation                                   | Propionat...mol.g.      | 0.286258306  | 0.000439889 | 0.000637588 |
| ko00350_Tyrosine_metabolism                                         | Butyrat...mol.g.        | -0.285631981 | 0.000453376 | 0.000655114 |
| ko04622_RIG<>I<>like_receptor_signaling_pathway                     | Beta.Defensin.2..ng.g.  | -0.284299053 | 0.000462009 | 0.000665541 |
| ko00140_Steroid_hormone_biosynthesis                                | Propionat...mol.g.      | 0.284828365  | 0.000471239 | 0.000676761 |
| ko00440_Phosphonate_and_phosphinate_metabolism                      | Propionat...mol.g.      | -0.284214453 | 0.000485321 | 0.00069486  |
| ko00983_Drug_metabolism_<>_other_enzymes                            | Propionat...mol.g.      | 0.283069068  | 0.000512637 | 0.00073039  |
| ko04210_Apoptosis                                                   | Valerat...mol.g.        | 0.283044103  | 0.000513248 | 0.00073039  |
| ko00010_Glycolysis_/Gluconeogenesis                                 | Valerat...mol.g.        | -0.282820822 | 0.000518741 | 0.000735978 |
| ko00260_Glycine_serine_and_threonine_metabolism                     | Butyrat...mol.g.        | 0.282624752  | 0.00052361  | 0.000740648 |
| ko00633_Nitrotoluene_degradation                                    | Valerat...mol.g.        | -0.281897084 | 0.00054205  | 0.000764428 |
| ko00260_Glycine_serine_and_threonine_metabolism                     | Caproat...mol.g.        | 0.281300322  | 0.000557617 | 0.000784027 |

|                                                                    |                         |              |             |             |
|--------------------------------------------------------------------|-------------------------|--------------|-------------|-------------|
| ko04974_Protein_digestion_and_absorption                           | Butyrat...mol.g.        | 0.280926839  | 0.000567568 | 0.000795637 |
| ko00623_Toluene_degradation                                        | Butyrat...mol.g.        | 0.28053367   | 0.00057822  | 0.000807723 |
| ko05120_Epithelial_cell_signaling_in_Helicobacter_pylori_infection | Caproat...mol.g.        | 0.280482156  | 0.00057963  | 0.000807723 |
| ko00523_Polyketide_sugar_unit_biosynthesis                         | Propionat...mol.g.      | 0.278405909  | 0.000639134 | 0.000888008 |
| ko04910_Insulin_signaling_pathway                                  | Propionat...mol.g.      | -0.278271793 | 0.000643165 | 0.000890973 |
| ko00642_Ethylbenzene_degradation                                   | Propionat...mol.g.      | -0.278081008 | 0.000648939 | 0.000896327 |
| ko00930_Caprolactam_degradation                                    | Chromogranin.A..nmol.g. | -0.276924188 | 0.000656214 | 0.000903717 |
| ko00740_Riboflavin_metabolism                                      | Propionat...mol.g.      | 0.277300868  | 0.00067305  | 0.000924193 |
| ko00770_Pantothenate_and_CoA_biosynthesis                          | Beta.Defensin.2..ng.g.  | -0.276252431 | 0.000677204 | 0.000927186 |
| ko00020_Citrate_cycle_[TCA_cycle]                                  | Beta.Defensin.2..ng.g.  | 0.275825114  | 0.000690876 | 0.000943155 |
| ko00900_Terpenoid_backbone_biosynthesis                            | Chromogranin.A..nmol.g. | -0.275524879 | 0.000700633 | 0.000953703 |
| ko00380_Tryptophan_metabolism                                      | Calprotectin...g.g.     | -0.275329869 | 0.000707039 | 0.000959641 |
| ko00051_Fructose_and_mannose_metabolism                            | Butyrat...mol.g.        | -0.276178927 | 0.000709171 | 0.000959761 |
| ko00860_Porphyrin_and_chlorophyll_metabolism                       | Valerat...mol.g.        | -0.275701045 | 0.000725091 | 0.000978487 |
| ko05012_Parkinson's_disease                                        | Acetat...mol.g.         | -0.275296544 | 0.000738823 | 0.000994161 |
| ko02010_ABC_transporters                                           | Caproat...mol.g.        | -0.275106328 | 0.000745362 | 0.001000095 |
| ko00310_Lysine_degradation                                         | Butyrat...mol.g.        | -0.275012231 | 0.000748617 | 0.0010016   |
| ko00260_Glycine_serine_and_threonine_metabolism                    | Valerat...mol.g.        | 0.274748971  | 0.000757792 | 0.001010995 |
| ko00061_Fatty_acid_biosynthesis                                    | Valerat...mol.g.        | -0.274634259 | 0.000761822 | 0.001013493 |
| ko00633_Nitrotoluene_degradation                                   | Butyrat...mol.g.        | -0.274492766 | 0.000766821 | 0.00101726  |
| ko00310_Lysine_degradation                                         | Calprotectin...g.g.     | -0.27347025  | 0.000770882 | 0.001019768 |
| ko00300_Lysine_biosynthesis                                        | Acetat...mol.g.         | -0.27399364  | 0.000784694 | 0.001035123 |
| ko00310_Lysine_degradation                                         | Propionat...mol.g.      | -0.273103605 | 0.000817517 | 0.001072397 |
| ko00920_Sulfur_metabolism                                          | Valerat...mol.g.        | -0.273131956 | 0.000816452 | 0.001072397 |
| ko03020_RNA_polymerase                                             | Valerat...mol.g.        | -0.272606804 | 0.000836382 | 0.001094087 |
| ko00903_Limonene_and_pinene_degradation                            | Butyrat...mol.g.        | -0.272413018 | 0.000843848 | 0.001100788 |
| ko01040_Biosynthesis_of_unsaturated_fatty_acids                    | Acetat...mol.g.         | -0.272276587 | 0.000849142 | 0.001104624 |
| ko00020_Citrate_cycle_[TCA_cycle]                                  | Chromogranin.A..nmol.g. | -0.271159696 | 0.000857576 | 0.001112514 |
| ko00312_beta<>Lactam_resistance                                    | Beta.Defensin.2..ng.g.  | -0.270240505 | 0.000894486 | 0.001147715 |
| ko00903_Limonene_and_pinene_degradation                            | Calprotectin...g.g.     | -0.270307    | 0.000891768 | 0.001147715 |
| ko05145_Toxoplasmosis                                              | Acetat...mol.g.         | -0.271214976 | 0.000891382 | 0.001147715 |
| ko05012_Parkinson's_disease                                        | Butyrat...mol.g.        | -0.271154327 | 0.000893853 | 0.001147715 |
| ko04115_p53_signaling_pathway                                      | Acetat...mol.g.         | -0.270914115 | 0.000903699 | 0.001156377 |
| ko00051_Fructose_and_mannose_metabolism                            | Propionat...mol.g.      | -0.270469709 | 0.000922178 | 0.001176816 |
| ko00190_Oxidative_phosphorylation                                  | Caproat...mol.g.        | 0.270360183  | 0.000926785 | 0.00117949  |
| ko03430_Mismatch_repair                                            | Valerat...mol.g.        | 0.270226619  | 0.000932432 | 0.00118028  |
| ko00860_Porphyrin_and_chlorophyll_metabolism                       | Caproat...mol.g.        | -0.270246774 | 0.000931578 | 0.00118028  |
| ko00360_Phenylalanine_metabolism                                   | Acetat...mol.g.         | -0.270062741 | 0.000939404 | 0.001185908 |
| ko00650_Butanoate_metabolism                                       | Butyrat...mol.g.        | -0.269836472 | 0.000949108 | 0.001194946 |
| ko00941_Flavonoid_biosynthesis                                     | Butyrat...mol.g.        | -0.269475681 | 0.000964772 | 0.00121142  |
| ko05143_African_trypanosomiasis                                    | Caproat...mol.g.        | 0.268756679  | 0.000996696 | 0.001248169 |
| ko00750_Vitamin_B6_metabolism                                      | Propionat...mol.g.      | 0.268617584  | 0.001002983 | 0.001252701 |
| ko00350_Tyrosine_metabolism                                        | Propionat...mol.g.      | -0.268103534 | 0.001026533 | 0.001268618 |
| ko03022_Basal_transcription_factors                                | Butyrat...mol.g.        | -0.268271085 | 0.001018802 | 0.001268618 |
| ko00363_Bisphenol_degradation                                      | Valerat...mol.g.        | -0.268129788 | 0.001025318 | 0.001268618 |
| ko00660_C5<>Branched_dibasic_acid_metabolism                       | Caproat...mol.g.        | -0.268216762 | 0.001021302 | 0.001268618 |
| ko00983_Drug_metabolism_<>_other_enzymes                           | Beta.Defensin.2..ng.g.  | 0.266927529  | 0.00103994  | 0.001281814 |
| ko03013_RNA_transport                                              | Beta.Defensin.2..ng.g.  | -0.266818075 | 0.001045096 | 0.001284796 |
| ko00380_Tryptophan_metabolism                                      | Valerat...mol.g.        | 0.267432734  | 0.001058025 | 0.001297295 |
| ko05145_Toxoplasmosis                                              | Butyrat...mol.g.        | -0.267086117 | 0.001074642 | 0.001314239 |
| ko00340_Histidine_metabolism                                       | Beta.Defensin.2..ng.g.  | -0.266049926 | 0.001081943 | 0.00131973  |
| ko04115_p53_signaling_pathway                                      | Butyrat...mol.g.        | -0.266735744 | 0.001091682 | 0.00132816  |
| ko00564_Glycerophospholipid_metabolism                             | Beta.Defensin.2..ng.g.  | -0.265574229 | 0.001105353 | 0.001341318 |
| ko01040_Biosynthesis_of_unsaturated_fatty_acids                    | Propionat...mol.g.      | -0.266108795 | 0.001122791 | 0.001358966 |
| ko00400_Phenylalanine_tyrosine_and_tryptophan_biosynthesis         | Valerat...mol.g.        | -0.265632483 | 0.001146965 | 0.001384657 |
| ko03320_PPAR_signaling_pathway                                     | Valerat...mol.g.        | 0.265543698  | 0.001151523 | 0.001386595 |
| ko03070_Bacterial_secretion_system                                 | Calprotectin...g.g.     | -0.264251853 | 0.001172889 | 0.001405117 |
| ko00130_Ubiquinone_and_other_terpenoid<>quinone_biosynthesis       | Butyrat...mol.g.        | 0.265170734  | 0.001170853 | 0.001405117 |
| ko00908_Zeatin_biosynthesis                                        | Acetat...mol.g.         | 0.264764245  | 0.001192259 | 0.001424687 |
| ko00360_Phenylalanine_metabolism                                   | Propionat...mol.g.      | -0.2644314   | 0.001210052 | 0.001442279 |
| ko00770_Pantothenate_and_CoA_biosynthesis                          | Propionat...mol.g.      | -0.264372842 | 0.001213207 | 0.001442379 |
| ko00410_beta<>Alanine_metabolism                                   | Propionat...mol.g.      | 0.263502033  | 0.001261026 | 0.001495445 |
| ko00564_Glycerophospholipid_metabolism                             | Valerat...mol.g.        | -0.263342971 | 0.001269944 | 0.001502228 |
| ko00650_Butanoate_metabolism                                       | Valerat...mol.g.        | -0.262950051 | 0.001292222 | 0.00152474  |
| ko00361_Chlorocyclohexane_and_chlorobenzene_degradation            | Valerat...mol.g.        | -0.262211438 | 0.001335069 | 0.001571349 |
| ko00130_Ubiquinone_and_other_terpenoid<>quinone_biosynthesis       | Acetat...mol.g.         | 0.26167015   | 0.001367289 | 0.001605247 |
| ko03013_RNA_transport                                              | Caproat...mol.g.        | -0.261389571 | 0.001384268 | 0.001621129 |



|                                                            |                         |              |             |             |
|------------------------------------------------------------|-------------------------|--------------|-------------|-------------|
| ko00550_Peptidoglycan_biosynthesis                         | Beta.Defensin.2..ng.g.  | 0.258775884  | 0.001494624 | 0.001739351 |
| ko03008_Ribosome_biogenesis_in_eukaryotes                  | Valerat...mol.g.        | 0.259693353  | 0.001491076 | 0.001739351 |
| ko00940_Phenylpropanoid_biosynthesis                       | Caproat...mol.g.        | -0.259612838 | 0.001496328 | 0.001739351 |
| ko00785_Lipoic_acid_metabolism                             | Valerat...mol.g.        | 0.259011411  | 0.001536095 | 0.001781168 |
| ko00624_Polycyclic_aromatic_hydrocarbon_degradation        | Acetat...mol.g.         | 0.257869833  | 0.001614238 | 0.001862579 |
| ko04146_Peroxisome                                         | Caproat...mol.g.        | 0.257883358  | 0.001613291 | 0.001862579 |
| ko00471_D<>Glutamine_and_D<>glutamate_metabolism           | Acetat...mol.g.         | 0.257138567  | 0.001666179 | 0.00191311  |
| ko00230_Purine_metabolism                                  | Propionat...mol.g.      | 0.257194803  | 0.001662131 | 0.00191311  |
| ko00860_Porphyrin_and_chlorophyll_metabolism               | Beta.Defensin.2..ng.g.  | -0.25563271  | 0.001713808 | 0.001962998 |
| ko00072_Synthesis_and_degradation_of_ketone_bodies         | Caproat...mol.g.        | -0.256244605 | 0.001731741 | 0.001978713 |
| ko00351_DDT_degradation                                    | Calprotectin...g.g.     | -0.255311764 | 0.00173776  | 0.001980771 |
| ko00511_Other_glycan_degradation                           | Butyrat...mol.g.        | 0.256060507  | 0.001745531 | 0.001984811 |
| ko00561_Glycerolipid_metabolism                            | Beta.Defensin.2..ng.g.  | -0.254871964 | 0.001771077 | 0.002004246 |
| ko00312_beta<>Lactam_resistance                            | Acetat...mol.g.         | 0.255721856  | 0.001771158 | 0.002004246 |
| ko00908_Zeatin_biosynthesis                                | Butyrat...mol.g.        | 0.253400606  | 0.001956235 | 0.002208358 |
| ko00364_Fluorobenzoate_degradation                         | Calprotectin...g.g.     | -0.252315504 | 0.001976515 | 0.0022259   |
| ko03410_Base_excision_repair                               | Beta.Defensin.2..ng.g.  | 0.252215833  | 0.001984946 | 0.002230048 |
| ko00670_One_carbon_pool_by_folate                          | Propionat...mol.g.      | 0.252457298  | 0.002036342 | 0.002282329 |
| ko00460_Cyanoamino_acid_metabolism                         | Acetat...mol.g.         | 0.252274528  | 0.002052203 | 0.002286864 |
| ko00400_Phenylalanine_tyrosine_and_tryptophan_biosynthesis | Propionat...mol.g.      | -0.252319404 | 0.002048298 | 0.002286864 |
| ko00051_Fructose_and_mannose_metabolism                    | Caproat...mol.g.        | -0.252242469 | 0.002054996 | 0.002286864 |
| ko00565_Ether_lipid_metabolism                             | Beta.Defensin.2..ng.g.  | -0.249835263 | 0.002196284 | 0.002428749 |
| ko00650_Butanoate_metabolism                               | Acetat...mol.g.         | -0.250651923 | 0.002198011 | 0.002428749 |
| ko00600_Sphingolipid_metabolism                            | Caproat...mol.g.        | -0.250751854 | 0.002188767 | 0.002428749 |
| ko03070_Bacterial_secretion_system                         | Valerat...mol.g.        | 0.250499414  | 0.002212188 | 0.002436153 |
| ko00340_Histidine_metabolism                               | Caproat...mol.g.        | -0.250468333 | 0.002215087 | 0.002436153 |
| ko00351_DDT_degradation                                    | Acetat...mol.g.         | 0.250081283  | 0.002251482 | 0.002470395 |
| ko02010_ABC_transporters                                   | Beta.Defensin.2..ng.g.  | -0.249130279 | 0.002262676 | 0.00247689  |
| ko00562_Inositol_phosphate_metabolism                      | Chromogranin.A..nmol.g. | -0.249071523 | 0.00226829  | 0.002477262 |
| ko00510_N<>Glycan_biosynthesis                             | Butyrat...mol.g.        | 0.249216553  | 0.00233476  | 0.002543938 |
| ko00480_Glutathione_metabolism                             | Butyrat...mol.g.        | 0.249131549  | 0.002343095 | 0.002547111 |
| ko00310_Lysine_degradation                                 | Acetat...mol.g.         | -0.249016095 | 0.002354459 | 0.002553553 |
| ko03022_Basal_transcription_factors                        | Calprotectin...g.g.     | -0.247869271 | 0.002385984 | 0.002576883 |
| ko00363_Bisphenol_degradation                              | Propionat...mol.g.      | -0.248688827 | 0.002386944 | 0.002576883 |
| ko00625_Chloroalkane_and_chloroalkene_degradation          | Chromogranin.A..nmol.g. | -0.247181486 | 0.002455776 | 0.002645112 |
| ko00300_Lysine_biosynthesis                                | Beta.Defensin.2..ng.g.  | -0.246783259 | 0.002497026 | 0.002677261 |
| ko00600_Sphingolipid_metabolism                            | Acetat...mol.g.         | 0.247652275  | 0.002492531 | 0.002677261 |
| ko00030_Pentose_phosphate_pathway                          | Chromogranin.A..nmol.g. | 0.246572528  | 0.002519107 | 0.002691426 |
| ko00312_beta<>Lactam_resistance                            | Butyrat...mol.g.        | 0.247372925  | 0.002521701 | 0.002691426 |
| ko00510_N<>Glycan_biosynthesis                             | Acetat...mol.g.         | 0.247249929  | 0.002534641 | 0.002699104 |
| ko05146_Amoebiasis                                         | Acetat...mol.g.         | -0.2470171   | 0.002559303 | 0.0027192   |
| ko00643_Styrene_degradation                                | Caproat...mol.g.        | -0.246858162 | 0.002576263 | 0.00273104  |
| ko00970_Aminoacyl<>tRNA_biosynthesis                       | Beta.Defensin.2..ng.g.  | 0.245691191  | 0.002613385 | 0.002764153 |
| ko00195_Photosynthesis                                     | Butyrat...mol.g.        | 0.245837198  | 0.002687652 | 0.002836316 |
| ko00521_Streptomycin_biosynthesis                          | Propionat...mol.g.      | 0.245689163  | 0.002704159 | 0.002847338 |
| ko00250_Alanine_aspartate_and_glutamate_metabolism         | Beta.Defensin.2..ng.g.  | -0.244593797 | 0.002735231 | 0.002873612 |
| ko00642_Ethylbenzene_degradation                           | Valerat...mol.g.        | -0.245323455 | 0.002745333 | 0.002877787 |
| ko00300_Lysine_biosynthesis                                | Caproat...mol.g.        | -0.244792237 | 0.002806151 | 0.002934989 |
| ko00626_Naphthalene_degradation                            | Propionat...mol.g.      | -0.243458304 | 0.002964274 | 0.003093482 |
| ko04974_Protein_digestion_and_absorption                   | Beta.Defensin.2..ng.g.  | 0.242140344  | 0.00302642  | 0.003151333 |
| ko00643_Styrene_degradation                                | Propionat...mol.g.      | -0.242672497 | 0.003061146 | 0.00318044  |
| ko00710_Carbon_fixation_in_photosynthetic_organisms        | Caproat...mol.g.        | 0.242235791  | 0.003116208 | 0.003230501 |
| ko02030_Bacterial_chemotaxis                               | Caproat...mol.g.        | -0.242170611 | 0.003124502 | 0.003231965 |
| ko00430_Taurine_and_hypotaurine_metabolism                 | Caproat...mol.g.        | 0.242036411  | 0.003141643 | 0.003242553 |
| ko00280_Valine_leucine_and_isoleucine_degradation          | Valerat...mol.g.        | 0.24178718   | 0.0031737   | 0.003268457 |
| ko03013_RNA_transport                                      | Acetat...mol.g.         | -0.241683203 | 0.003187161 | 0.003275137 |
| ko00591_Linoleic_acid_metabolism                           | Butyrat...mol.g.        | -0.240997675 | 0.003277208 | 0.003360316 |
| ko00513_Various_types_of_N<>glycan_biosynthesis            | Butyrat...mol.g.        | -0.240346936 | 0.003364799 | 0.003435129 |
| ko03015_mRNA_surveillance_pathway                          | Butyrat...mol.g.        | -0.240346936 | 0.003364799 | 0.003435129 |
| ko00480_Glutathione_metabolism                             | Caproat...mol.g.        | 0.239944024  | 0.003420085 | 0.003483996 |
| ko00380_Tryptophan_metabolism                              | Caproat...mol.g.        | 0.239626481  | 0.003464231 | 0.003521329 |
| ko00361_Chlorocyclohexane_and_chlorobenzene_degradation    | Caproat...mol.g.        | -0.239454478 | 0.003488358 | 0.003538194 |
| ko00860_Porphyrin_and_chlorophyll_metabolism               | Chromogranin.A..nmol.g. | 0.23837473   | 0.003528007 | 0.003570698 |
| ko00400_Phenylalanine_tyrosine_and_tryptophan_biosynthesis | Chromogranin.A..nmol.g. | 0.238063772  | 0.003572599 | 0.003608054 |
| ko05012_Parkinson's_disease                                | Propionat...mol.g.      | -0.238686213 | 0.003597978 | 0.003625887 |
| ko05145_Toxoplasmosis                                      | Propionat...mol.g.      | -0.238083506 | 0.003686136 | 0.003706774 |
| ko00340_Histidine_metabolism                               | Valerat...mol.g.        | -0.23792599  | 0.003709494 | 0.003722292 |

|                                                               |                         |              |             |             |
|---------------------------------------------------------------|-------------------------|--------------|-------------|-------------|
| ko04115_p53_signaling_pathway                                 | Propionat...mol.g.      | -0.237784547 | 0.003730582 | 0.003735471 |
| ko04974_Protein_digestion_and_absorption                      | Caproat...mol.g.        | 0.237715772  | 0.003740874 | 0.003737807 |
| ko00195_Photosynthesis                                        | Acetat...mol.g.         | 0.237627634  | 0.003754102 | 0.00374306  |
| ko00030_Pentose_phosphate_pathway                             | Butyrat...mol.g.        | -0.237168747 | 0.003823654 | 0.00380433  |
| ko00051_Fructose_and_mannose_metabolism                       | Acetat...mol.g.         | -0.236196035 | 0.003974928 | 0.003946479 |
| ko05100_Bacterial_invasion_of_epithelial_cells                | Valerat...mol.g.        | 0.236080661  | 0.003993223 | 0.003956279 |
| ko00624_Polycyclic_aromatic_hydrocarbon_degradation           | Calprotectin...g.g.     | 0.235208808  | 0.004006342 | 0.003957324 |
| ko04622_RIG<> <>like_receptor_signaling_pathway               | Caproat...mol.g.        | -0.235968182 | 0.004011132 | 0.003957324 |
| ko04146_Peroxisome                                            | Beta.Defensin.2..ng.g.  | 0.234894528  | 0.00405687  | 0.003994058 |
| ko00906_Carotenoid_biosynthesis                               | Chromogranin.A..nmol.g. | 0.234692773  | 0.004089608 | 0.004017866 |
| ko02030_Bacterial_chemotaxis                                  | Beta.Defensin.2..ng.g.  | -0.23443734  | 0.004131396 | 0.004050447 |
| ko00312_beta<>Lactam_resistance                               | Chromogranin.A..nmol.g. | 0.234321178  | 0.004150526 | 0.004060725 |
| ko04112_Cell_cycle_<>_Caulobacter                             | Propionat...mol.g.      | 0.234937216  | 0.004178673 | 0.004079763 |
| ko00650_Butanoate_metabolism                                  | Chromogranin.A..nmol.g. | -0.233643735 | 0.004263685 | 0.004154127 |
| ko00350_Tyrosine_metabolism                                   | Valerat...mol.g.        | -0.234276372 | 0.004289343 | 0.004170473 |
| ko00250_Alanine_aspartate_and_glutamate_metabolism            | Acetat...mol.g.         | 0.233972742  | 0.004341067 | 0.004212043 |
| ko00600_Sphingolipid_metabolism                               | Propionat...mol.g.      | 0.232715802  | 0.004561197 | 0.004416505 |
| ko00250_Alanine_aspartate_and_glutamate_metabolism            | Caproat...mol.g.        | -0.232053847 | 0.004681102 | 0.00452328  |
| ko00624_Polycyclic_aromatic_hydrocarbon_degradation           | Butyrat...mol.g.        | 0.230553816  | 0.004963326 | 0.004786142 |
| ko00642_Ethylbenzene_degradation                              | Acetat...mol.g.         | -0.230313631 | 0.005009904 | 0.004821157 |
| ko02060_Phosphotransferase_system_[PTS]                       | Butyrat...mol.g.        | -0.22994913  | 0.005081337 | 0.004879898 |
| ko04146_Peroxisome                                            | Butyrat...mol.g.        | 0.229828237  | 0.005105229 | 0.004892838 |
| ko00511_Other_glycan_degradation                              | Chromogranin.A..nmol.g. | 0.228715828  | 0.005173673 | 0.004928309 |
| ko00790_Folate_biosynthesis                                   | Acetat...mol.g.         | 0.22954483   | 0.005161633 | 0.004928309 |
| ko00300_Lysine_biosynthesis                                   | Butyrat...mol.g.        | -0.229484445 | 0.005173723 | 0.004928309 |
| ko03018_RNA_degradation                                       | Acetat...mol.g.         | 0.228071451  | 0.005463946 | 0.005183736 |
| ko00460_Cyanoamino_acid_metabolism                            | Caproat...mol.g.        | -0.228121189 | 0.005453488 | 0.005183736 |
| ko00195_Photosynthesis                                        | Chromogranin.A..nmol.g. | 0.226412126  | 0.005655818 | 0.00535495  |
| ko04113_Meiosis_<>_yeast                                      | Beta.Defensin.2..ng.g.  | 0.226303543  | 0.005679502 | 0.005366554 |
| ko00351_DDT_degradation                                       | Butyrat...mol.g.        | 0.226941134  | 0.005706486 | 0.005381225 |
| ko00960_Tropane_piperidine_and_pyridine_alkaloid_biosynthesis | Beta.Defensin.2..ng.g.  | 0.225241759  | 0.005915809 | 0.005567437 |
| ko05146_Amoebiasis                                            | Butyrat...mol.g.        | -0.22565963  | 0.005993053 | 0.005628852 |
| ko04142_Lysosome                                              | Acetat...mol.g.         | 0.225374035  | 0.006058639 | 0.005679094 |
| ko00340_Histidine_metabolism                                  | Chromogranin.A..nmol.g. | 0.224327971  | 0.006126158 | 0.005730944 |
| ko00361_Chlorocyclohexane_and_chlorobenzene_degradation       | Beta.Defensin.2..ng.g.  | -0.22382022  | 0.006245899 | 0.005830717 |
| ko00600_Sphingolipid_metabolism                               | Butyrat...mol.g.        | 0.224524029  | 0.006257644 | 0.005830717 |
| ko00790_Folate_biosynthesis                                   | Chromogranin.A..nmol.g. | -0.223539472 | 0.006312998 | 0.005870647 |
| ko00780_Biotin_metabolism                                     | Valerat...mol.g.        | 0.224149249  | 0.006347222 | 0.005890808 |
| ko00565_Ether_lipid_metabolism                                | Calprotectin...g.g.     | 0.223156546  | 0.006405552 | 0.005933218 |
| ko04626_Plant<>pathogen_interaction                           | Beta.Defensin.2..ng.g.  | -0.222994897 | 0.006444985 | 0.005957991 |
| ko03020_RNA_polymerase                                        | Caproat...mol.g.        | -0.223499792 | 0.00650516  | 0.006001805 |
| ko00623_Toluene_degradation                                   | Beta.Defensin.2..ng.g.  | 0.222546758  | 0.006555435 | 0.006036331 |
| ko00250_Alanine_aspartate_and_glutamate_metabolism            | Butyrat...mol.g.        | 0.223024403  | 0.006622975 | 0.006086588 |
| ko00053_Ascorbate_and_aldarate_metabolism                     | Butyrat...mol.g.        | -0.222417835 | 0.006776055 | 0.006215107 |
| ko00071_Fatty_acid_metabolism                                 | Calprotectin...g.g.     | -0.221535647 | 0.00681085  | 0.006222714 |
| ko00941_Flavonoid_biosynthesis                                | Propionat...mol.g.      | -0.222324646 | 0.00679985  | 0.006222714 |
| ko03070_Bacterial_secretion_system                            | Beta.Defensin.2..ng.g.  | 0.221212214  | 0.0068944   | 0.006286818 |
| ko00140_Steroid_hormone_biosynthesis                          | Valerat...mol.g.        | 0.221627386  | 0.006980259 | 0.006352775 |
| ko00520_Amino_sugar_and_nucleotide_sugar_metabolism           | Propionat...mol.g.      | 0.221097032  | 0.007120318 | 0.006457546 |
| ko00906_Carotenoid_biosynthesis                               | Valerat...mol.g.        | -0.22108742  | 0.00712288  | 0.006457546 |
| ko00253_Tetracycline_biosynthesis                             | Caproat...mol.g.        | -0.220876276 | 0.007179349 | 0.0064962   |
| ko00400_Phenylalanine_tyrosine_and_tryptophan_biosynthesis    | Caproat...mol.g.        | -0.220159912 | 0.007373913 | 0.006659419 |
| ko00362_Benzoate_degradation                                  | Caproat...mol.g.        | -0.220086197 | 0.007394197 | 0.00666492  |
| ko04113_Meiosis_<>_yeast                                      | Valerat...mol.g.        | 0.220012279  | 0.007414587 | 0.006670496 |
| ko00785_Lipoic_acid_metabolism                                | Calprotectin...g.g.     | -0.21913522  | 0.007452983 | 0.006679686 |
| ko00281_Geraniol_degradation                                  | Caproat...mol.g.        | 0.219872611  | 0.007453249 | 0.006679686 |
| ko00340_Histidine_metabolism                                  | Propionat...mol.g.      | -0.219557323 | 0.007541185 | 0.006745621 |
| ko00591_Linoleic_acid_metabolism                              | Beta.Defensin.2..ng.g.  | -0.218706011 | 0.007573301 | 0.00676147  |
| ko00590_Arachidonic_acid_metabolism                           | Chromogranin.A..nmol.g. | -0.218410527 | 0.00765713  | 0.006823341 |
| ko04122_Sulfur_relay_system                                   | Chromogranin.A..nmol.g. | 0.218190265  | 0.007720153 | 0.006866472 |
| ko02040_Flagellar_assembly                                    | Beta.Defensin.2..ng.g.  | -0.218130362 | 0.007737373 | 0.006868779 |
| ko00360_Phenylalanine_metabolism                              | Caproat...mol.g.        | -0.21852305  | 0.007836148 | 0.00694334  |
| ko00790_Folate_biosynthesis                                   | Butyrat...mol.g.        | 0.217600979  | 0.008107689 | 0.007170414 |
| ko00941_Flavonoid_biosynthesis                                | Acetat...mol.g.         | -0.217089114 | 0.008261999 | 0.007293151 |
| ko00780_Biotin_metabolism                                     | Chromogranin.A..nmol.g. | 0.215778495  | 0.008440921 | 0.007437112 |
| ko03018_RNA_degradation                                       | Butyrat...mol.g.        | 0.216348597  | 0.008489842 | 0.007466207 |
| ko00760_Nicotinate_and_nicotinamide_metabolism                | Acetat...mol.g.         | 0.215483713  | 0.008762975 | 0.007692003 |



|                                                                 |                         |              |             |             |
|-----------------------------------------------------------------|-------------------------|--------------|-------------|-------------|
| ko00521_Streptomycin_biosynthesis                               | Chromogranin.A..nmol.g. | 0.214051571  | 0.008992997 | 0.007879186 |
| ko04115_p53_signaling_pathway                                   | Calprotectin...g.g.     | -0.213316153 | 0.00923763  | 0.008078448 |
| ko05012_Parkinson's_disease                                     | Calprotectin...g.g.     | -0.213082324 | 0.009316634 | 0.008132394 |
| ko05145_Toxoplasmosis                                           | Calprotectin...g.g.     | -0.212913558 | 0.009374025 | 0.00816731  |
| ko00940_Phenylpropanoid_biosynthesis                            | Butyrat...mol.g.        | 0.213469817  | 0.009429283 | 0.008200241 |
| ko01053_Biosynthesis_of_siderophore_group_nonribosomal_peptides | Valerat...mol.g.        | 0.212941598  | 0.009611288 | 0.008343072 |
| ko05143_African_trypanosomiasis                                 | Propionat...mol.g.      | -0.212682842 | 0.009701572 | 0.008405905 |
| ko00564_Glycerophospholipid_metabolism                          | Acetat...mol.g.         | -0.211295714 | 0.010198428 | 0.008803918 |
| ko00620_Pyruvate_metabolism                                     | Caproat...mol.g.        | -0.211338621 | 0.010182729 | 0.008803918 |
| ko00030_Pentose_phosphate_pathway                               | Acetat...mol.g.         | -0.211082263 | 0.010276842 | 0.008855332 |
| ko00620_Pyruvate_metabolism                                     | Beta.Defensin.2..ng.g.  | -0.210308195 | 0.010300468 | 0.008859434 |
| ko00643_Styrene_degradation                                     | Acetat...mol.g.         | -0.210823477 | 0.010372622 | 0.008905184 |
| ko00643_Styrene_degradation                                     | Valerat...mol.g.        | -0.210618083 | 0.010449199 | 0.008954558 |
| ko00051_Fructose_and_mannose_metabolism                         | Calprotectin...g.g.     | 0.209418905  | 0.010634662 | 0.009096892 |
| ko00623_Toluene_degradation                                     | Caproat...mol.g.        | 0.209295378  | 0.010954379 | 0.00935334  |
| ko00450_Selenocompound_metabolism                               | Chromogranin.A..nmol.g. | 0.208374748  | 0.011039206 | 0.009391618 |
| ko00311_Penicillin_and_cephalosporin_biosynthesis               | Calprotectin...g.g.     | -0.208423436 | 0.011020046 | 0.009391618 |
| ko01053_Biosynthesis_of_siderophore_group_nonribosomal_peptides | Butyrat...mol.g.        | 0.208624627  | 0.011218672 | 0.00952704  |
| ko04146_Peroxisome                                              | Acetat...mol.g.         | 0.20834329   | 0.011331183 | 0.009605217 |
| ko05110_Vibrio_cholerae_infection                               | Calprotectin...g.g.     | -0.207120135 | 0.011543135 | 0.009767254 |
| ko00290_Valine_leucine_and_isoleucine_biosynthesis              | Caproat...mol.g.        | -0.207652845 | 0.011611516 | 0.009807443 |
| ko04976_Bile_secretion                                          | Calprotectin...g.g.     | -0.206874232 | 0.011644239 | 0.009817425 |
| ko02040_Flagellar_assembly                                      | Acetat...mol.g.         | -0.20658468  | 0.01205721  | 0.010147389 |
| ko00903_Limonene_and_pinene_degradation                         | Beta.Defensin.2..ng.g.  | 0.205828866  | 0.012082775 | 0.010150713 |
| ko00130_Ubiquinone_and_other_terpenoid<>quinone_biosynthesis    | Chromogranin.A..nmol.g. | -0.205452119 | 0.012244337 | 0.010268072 |
| ko00040_Pentose_and_glucuronate_interconversions                | Propionat...mol.g.      | -0.206085277 | 0.012270686 | 0.010271826 |
| ko00633_Nitrotoluene_degradation                                | Caproat...mol.g.        | -0.205949828 | 0.012329154 | 0.010302405 |
| ko00970_Aminoacyl<>tRNA_biosynthesis                            | Valerat...mol.g.        | 0.205676365  | 0.012447941 | 0.01038319  |
| ko00053_Ascorbate_and_aldarate_metabolism                       | Acetat...mol.g.         | -0.204572952 | 0.012937491 | 0.010772404 |
| ko02040_Flagellar_assembly                                      | Caproat...mol.g.        | -0.204150413 | 0.013129374 | 0.010912826 |
| ko03022_Basal_transcription_factors                             | Acetat...mol.g.         | -0.203836906 | 0.013273348 | 0.011013002 |
| ko02060_Phosphotransferase_system_[PTS]                         | Caproat...mol.g.        | -0.203082483 | 0.013625483 | 0.011285232 |
| ko04626_Plant<>pathogen_interaction                             | Caproat...mol.g.        | -0.202649832 | 0.013831089 | 0.011435357 |
| ko00072_Synthesis_and_degradation_of_ketone_bodies              | Beta.Defensin.2..ng.g.  | -0.201325474 | 0.014141821 | 0.011671717 |
| ko00460_Cyanoamino_acid_metabolism                              | Propionat...mol.g.      | 0.201153209  | 0.014563377 | 0.011998554 |
| ko04142_Lysosome                                                | Butyrat...mol.g.        | 0.201093332  | 0.014593365 | 0.012002204 |
| ko00983_Drug_metabolism_<>_other_enzymes                        | Chromogranin.A..nmol.g. | -0.19955522  | 0.015031504 | 0.012339108 |
| ko00450_Selenocompound_metabolism                               | Calprotectin...g.g.     | 0.19950865   | 0.015055553 | 0.012339108 |
| ko00340_Histidine_metabolism                                    | Acetat...mol.g.         | -0.199742914 | 0.015284153 | 0.012504639 |
| ko00791_Atrazine_degradation                                    | Caproat...mol.g.        | 0.199608403  | 0.015354496 | 0.012540342 |
| ko05010_Alzheimer's_disease                                     | Beta.Defensin.2..ng.g.  | 0.198571242  | 0.01554682  | 0.012675373 |
| ko00750_Vitamin_B6_metabolism                                   | Acetat...mol.g.         | 0.19899319   | 0.015679829 | 0.01276166  |
| ko00983_Drug_metabolism_<>_other_enzymes                        | Acetat...mol.g.         | 0.198859075  | 0.015751542 | 0.012797847 |
| ko05111_Vibrio_cholerae_pathogenic_cycle                        | Chromogranin.A..nmol.g. | 0.197907701  | 0.015902946 | 0.012888101 |
| ko00680_Methane_metabolism                                      | Beta.Defensin.2..ng.g.  | -0.197880833 | 0.015917515 | 0.012888101 |
| ko00260_Glycine_serine_and_threonine_metabolism                 | Beta.Defensin.2..ng.g.  | 0.197636506  | 0.016050529 | 0.012928927 |
| ko00940_Phenylpropanoid_biosynthesis                            | Beta.Defensin.2..ng.g.  | -0.197660569 | 0.016037386 | 0.012928927 |
| ko04976_Bile_secretion                                          | Butyrat...mol.g.        | -0.198406263 | 0.015995781 | 0.012928927 |
| ko05110_Vibrio_cholerae_infection                               | Butyrat...mol.g.        | -0.196910722 | 0.016826012 | 0.01353038  |
| ko00630_Glyoxylate_and_dicarboxylate_metabolism                 | Propionat...mol.g.      | -0.196453482 | 0.017087202 | 0.013716925 |
| ko00562_Inositol_phosphate_metabolism                           | Calprotectin...g.g.     | -0.19573741  | 0.017117796 | 0.013718035 |
| ko00531_Glycosaminoglycan_degradation                           | Acetat...mol.g.         | 0.196314476  | 0.017167302 | 0.013734271 |
| ko00960_Tropane_piperidine_and_pyridine_alkaloid_biosynthesis   | Chromogranin.A..nmol.g. | -0.195096128 | 0.017491846 | 0.013949907 |
| ko00523_Polyketide_sugar_unit_biosynthesis                      | Butyrat...mol.g.        | 0.195749456  | 0.017496249 | 0.013949907 |
| ko03013_RNA_transport                                           | Butyrat...mol.g.        | -0.195689009 | 0.017531762 | 0.01395453  |
| ko00561_Glycerolipid_metabolism                                 | Caproat...mol.g.        | -0.195451981 | 0.017671621 | 0.014042052 |
| ko03410_Base_excision_repair                                    | Valerat...mol.g.        | 0.194797406  | 0.018062895 | 0.014328717 |
| ko01053_Biosynthesis_of_siderophore_group_nonribosomal_peptides | Acetat...mol.g.         | 0.194353749  | 0.018332341 | 0.014505748 |
| ko00903_Limonene_and_pinene_degradation                         | Propionat...mol.g.      | -0.194328405 | 0.018347838 | 0.014505748 |
| ko00591_Linoleic_acid_metabolism                                | Acetat...mol.g.         | -0.193564169 | 0.018820496 | 0.014854422 |
| ko00590_Arachidonic_acid_metabolism                             | Acetat...mol.g.         | 0.193416831  | 0.018912822 | 0.014902247 |
| ko00350_Tyrosine_metabolism                                     | Chromogranin.A..nmol.g. | 0.190446576  | 0.020422181 | 0.016064583 |
| ko00591_Linoleic_acid_metabolism                                | Chromogranin.A..nmol.g. | 0.190341072  | 0.020493315 | 0.016093582 |
| ko00565_Ether_lipid_metabolism                                  | Valerat...mol.g.        | -0.19071718  | 0.02067522  | 0.016209327 |
| ko04910_Insulin_signaling_pathway                               | Butyrat...mol.g.        | -0.1906587   | 0.020714914 | 0.01621338  |
| ko03022_Basal_transcription_factors                             | Propionat...mol.g.      | -0.189739636 | 0.021347439 | 0.016680651 |
| ko00621_Dioxin_degradation                                      | Beta.Defensin.2..ng.g.  | -0.18875744  | 0.021587041 | 0.016839853 |

|                                                               |                         |              |             |             |
|---------------------------------------------------------------|-------------------------|--------------|-------------|-------------|
| ko00513_Various_types_of_N<>glycan_biosynthesis               | Calprotectin...g.g.     | -0.187880405 | 0.022214125 | 0.017271654 |
| ko03015_mRNA_surveillance_pathway                             | Calprotectin...g.g.     | -0.187880405 | 0.022214125 | 0.017271654 |
| ko02030_Bacterial_chemotaxis                                  | Acetat...mol.g.         | -0.188416789 | 0.022287047 | 0.01729971  |
| ko00500_Starch_and_sucrose_metabolism                         | Calprotectin...g.g.     | 0.187526616  | 0.022471489 | 0.017414094 |
| ko03320_PPAR_signaling_pathway                                | Chromogranin.A..nmol.g. | -0.187475822 | 0.022508648 | 0.017414154 |
| ko00240_Pyrimidine_metabolism                                 | Propionat...mol.g.      | 0.187779389  | 0.02275235  | 0.017573746 |
| ko00280_Valine_leucine_and_isoleucine_degradation             | Caproat...mol.g.        | 0.187537959  | 0.022930763 | 0.017682468 |
| ko02020_Two<>component_system                                 | Acetat...mol.g.         | -0.187353311 | 0.023068024 | 0.017759152 |
| ko00363_Bisphenol_degradation                                 | Chromogranin.A..nmol.g. | 0.185695221  | 0.023845129 | 0.018326944 |
| ko00473_D<>Alanine_metabolism                                 | Chromogranin.A..nmol.g. | -0.185645246 | 0.023883601 | 0.018326944 |
| ko00330_Arginine_and_proline_metabolism                       | Acetat...mol.g.         | -0.18586671  | 0.024199076 | 0.01853873  |
| ko00440_Phosphonate_and_phosphinate_metabolism                | Butyrat...mol.g.        | -0.184674466 | 0.02514024  | 0.019219009 |
| ko00760_Nicotinate_and_nicotinamide_metabolism                | Butyrat...mol.g.        | 0.18463875   | 0.025168912 | 0.019219009 |
| ko00531_Glycosaminoglycan_degradation                         | Butyrat...mol.g.        | 0.184347675  | 0.025403622 | 0.01933794  |
| ko00960_Tropane_piperidine_and_pyridine_alkaloid_biosynthesis | Valerat...mol.g.        | 0.18434348   | 0.025407018 | 0.01933794  |
| ko00363_Bisphenol_degradation                                 | Acetat...mol.g.         | -0.183698199 | 0.025934096 | 0.019707172 |
| ko00440_Phosphonate_and_phosphinate_metabolism                | Acetat...mol.g.         | -0.18362453  | 0.025994861 | 0.019721436 |
| ko00480_Glutathione_metabolism                                | Chromogranin.A..nmol.g. | -0.182643027 | 0.026294665 | 0.019870634 |
| ko05130_Pathogenic_Escherichia_coli_infection                 | Calprotectin...g.g.     | -0.182535559 | 0.026384697 | 0.019870634 |
| ko00350_Tyrosine_metabolism                                   | Acetat...mol.g.         | -0.183133404 | 0.026403083 | 0.019870634 |
| ko00281_Geraniol_degradation                                  | Butyrat...mol.g.        | 0.183261521  | 0.026296068 | 0.019870634 |
| ko00770_Pantothenate_and_CoA_biosynthesis                     | Caproat...mol.g.        | -0.183201974 | 0.026345761 | 0.019870634 |
| ko00061_Fatty_acid_biosynthesis                               | Calprotectin...g.g.     | -0.181602563 | 0.027177462 | 0.020420696 |
| ko05111_Vibrio_cholerae_pathogenic_cycle                      | Calprotectin...g.g.     | 0.181386853  | 0.027363619 | 0.020527728 |
| ko05100_Bacterial_invasion_of_epithelial_cells                | Propionat...mol.g.      | 0.181877864  | 0.027471678 | 0.020575923 |
| ko03060_Protein_export                                        | Propionat...mol.g.      | 0.181619498  | 0.027696096 | 0.020710977 |
| ko00622_Xylene_degradation                                    | Beta.Defensin.2..ng.g.  | -0.180720561 | 0.027945517 | 0.020864269 |
| ko00281_Geraniol_degradation                                  | Acetat...mol.g.         | 0.180088422  | 0.029058353 | 0.021660681 |
| ko00720_Carbon_fixation_pathways_in_prokaryotes               | Calprotectin...g.g.     | -0.179327989 | 0.029195861 | 0.021728693 |
| ko00061_Fatty_acid_biosynthesis                               | Chromogranin.A..nmol.g. | -0.178828577 | 0.029655726 | 0.022001208 |
| ko00590_Arachidonic_acid_metabolism                           | Butyrat...mol.g.        | 0.179472262  | 0.029622461 | 0.022001208 |
| ko00330_Arginine_and_proline_metabolism                       | Chromogranin.A..nmol.g. | 0.178408083  | 0.030047689 | 0.022237093 |
| ko00190_Oxidative_phosphorylation                             | Calprotectin...g.g.     | -0.17833556  | 0.030115735 | 0.022237093 |
| ko05131_Shigellosis                                           | Calprotectin...g.g.     | -0.178336866 | 0.030114508 | 0.022237093 |
| ko04122_Sulfur_relay_system                                   | Acetat...mol.g.         | -0.178694379 | 0.030347917 | 0.022373356 |
| ko04141_Protein_processing_in_endoplasmic_reticulum           | Chromogranin.A..nmol.g. | -0.177208676 | 0.031190006 | 0.022958127 |
| ko05150_Staphylococcus_aureus_infection                       | Calprotectin...g.g.     | 0.177112352  | 0.031283325 | 0.02299078  |
| ko00720_Carbon_fixation_pathways_in_prokaryotes               | Propionat...mol.g.      | 0.177295674  | 0.031690374 | 0.023253539 |
| ko05142_Chagas_disease_[American_trypanosomiasis]             | Valerat...mol.g.        | 0.177209009  | 0.031775186 | 0.023279398 |
| ko00510_N<>Glycan_biosynthesis                                | Chromogranin.A..nmol.g. | -0.176329482 | 0.032050595 | 0.023444595 |
| ko04622_RIG<>I<>like_receptor_signaling_pathway               | Valerat...mol.g.        | -0.176778177 | 0.032199672 | 0.023517012 |
| ko05010_Alzheimer's_disease                                   | Calprotectin...g.g.     | -0.176035705 | 0.032342609 | 0.023584727 |
| ko00643_Styrene_degradation                                   | Beta.Defensin.2..ng.g.  | -0.175856232 | 0.032522111 | 0.023651752 |
| ko05146_Amoebiasis                                            | Propionat...mol.g.      | -0.176440976 | 0.032535252 | 0.023651752 |
| ko03050_Proteasome                                            | Calprotectin...g.g.     | -0.175565881 | 0.0328143   | 0.023817739 |
| ko00830_Retinol_metabolism                                    | Chromogranin.A..nmol.g. | 0.174885751  | 0.033507452 | 0.024245904 |
| ko05010_Alzheimer's_disease                                   | Valerat...mol.g.        | 0.175493346  | 0.033494237 | 0.024245904 |
| ko00513_Various_types_of_N<>glycan_biosynthesis               | Acetat...mol.g.         | -0.174901995 | 0.034104717 | 0.024602267 |
| ko03015_mRNA_surveillance_pathway                             | Acetat...mol.g.         | -0.174901995 | 0.034104717 | 0.024602267 |
| ko00625_Chloroalkane_and_chloroalkene_degradation             | Valerat...mol.g.        | -0.174284362 | 0.03475235  | 0.025008537 |
| ko00650_Butanoate_metabolism                                  | Caproat...mol.g.        | -0.174263494 | 0.034774412 | 0.025008537 |
| ko00062_Fatty_acid_elongation_in_mitochondria                 | Valerat...mol.g.        | 0.173300204  | 0.035805777 | 0.025671632 |
| ko05322_Systemic_lupus_erythematosus                          | Valerat...mol.g.        | 0.173300204  | 0.035805777 | 0.025671632 |
| ko00253_Tetracycline_biosynthesis                             | Beta.Defensin.2..ng.g.  | -0.172515245 | 0.036021014 | 0.025747332 |
| ko00650_Butanoate_metabolism                                  | Calprotectin...g.g.     | -0.172549868 | 0.035983188 | 0.025747332 |
| ko00903_Limonene_and_pinene_degradation                       | Caproat...mol.g.        | 0.172552916  | 0.036623551 | 0.026138233 |
| ko00523_Polyketide_sugar_unit_biosynthesis                    | Chromogranin.A..nmol.g. | 0.171539257  | 0.037101193 | 0.026438946 |
| ko00440_Phosphonate_and_phosphinate_metabolism                | Chromogranin.A..nmol.g. | 0.17148558   | 0.037161384 | 0.026441715 |
| ko00363_Bisphenol_degradation                                 | Beta.Defensin.2..ng.g.  | -0.170264475 | 0.03855306  | 0.027390443 |
| ko00523_Polyketide_sugar_unit_biosynthesis                    | Valerat...mol.g.        | 0.170470399  | 0.038986    | 0.027656191 |
| ko00760_Nicotinate_and_nicotinamide_metabolism                | Chromogranin.A..nmol.g. | -0.169688478 | 0.039224578 | 0.027775591 |
| ko00633_Nitrotoluene_degradation                              | Chromogranin.A..nmol.g. | -0.1696476   | 0.039272606 | 0.027775591 |
| ko00623_Toluene_degradation                                   | Calprotectin...g.g.     | -0.169551707 | 0.039385467 | 0.027798243 |
| ko00791_Atrazine_degradation                                  | Propionat...mol.g.      | -0.170096856 | 0.039423022 | 0.027798243 |
| ko04210_Apoptosis                                             | Calprotectin...g.g.     | -0.169275593 | 0.039711961 | 0.027918144 |
| ko05010_Alzheimer's_disease                                   | Butyrat...mol.g.        | -0.169853662 | 0.03970975  | 0.027918144 |
| ko00270_Cysteine_and_methionine_metabolism                    | Calprotectin...g.g.     | 0.167813998  | 0.041478331 | 0.029116343 |



|                                                               |                         |              |             |             |
|---------------------------------------------------------------|-------------------------|--------------|-------------|-------------|
| ko00250_Alanine_aspartate_and_glutamate_metabolism            | Propionat...mol.g.      | 0.168093776  | 0.041837304 | 0.029324496 |
| ko00900_Terpenoid_backbone_biosynthesis                       | Propionat...mol.g.      | 0.167971779  | 0.041988261 | 0.029386444 |
| ko02040_Flagellar_assembly                                    | Butyrat...mol.g.        | -0.167755024 | 0.042257595 | 0.029520959 |
| ko03320_PPAR_signaling_pathway                                | Caproat...mol.g.        | 0.167716044  | 0.042306184 | 0.029520959 |
| ko00410_beta<>Alanine_metabolism                              | Beta.Defensin.2..ng.g.  | 0.166941997  | 0.042563186 | 0.029656228 |
| ko00523_Polyketide_sugar_unit_biosynthesis                    | Acetat...mol.g.         | 0.167453256  | 0.042634972 | 0.029662236 |
| ko00072_Synthesis_and_degradation_of_ketone_bodies            | Acetat...mol.g.         | -0.166076213 | 0.044393017 | 0.030839663 |
| ko00930_Caprolactam_degradation                               | Valerat...mol.g.        | 0.165982049  | 0.044515414 | 0.030879014 |
| ko00280_Valine_leucine_and_isoleucine_degradation             | Calprotectin...g.g.     | -0.165350486 | 0.044604419 | 0.030895118 |
| ko00230_Purine_metabolism                                     | Acetat...mol.g.         | 0.165341413  | 0.045355563 | 0.031333833 |
| ko00521_Streptomycin_biosynthesis                             | Butyrat...mol.g.        | 0.165329596  | 0.045371252 | 0.031333833 |
| ko00270_Cysteine_and_methionine_metabolism                    | Chromogranin.A..nmol.g. | 0.164603329  | 0.045590532 | 0.031439036 |
| ko00473_D<>Alanine_metabolism                                 | Beta.Defensin.2..ng.g.  | 0.16402303   | 0.046368909 | 0.031837121 |
| ko04141_Protein_processing_in_endoplasmic_reticulum           | Acetat...mol.g.         | 0.164580167  | 0.046371187 | 0.031837121 |
| ko05010_Alzheimer's_disease                                   | Acetat...mol.g.         | -0.164678393 | 0.046239092 | 0.031837121 |
| ko00621_Dioxin_degradation                                    | Caproat...mol.g.        | -0.164383724 | 0.04663631  | 0.031972403 |
| ko00532_Glycosaminoglycan_biosynthesis_<>_chondroitin_sulfate | Beta.Defensin.2..ng.g.  | -0.163558912 | 0.046999388 | 0.032174348 |
| ko00270_Cysteine_and_methionine_metabolism                    | Valerat...mol.g.        | -0.164004693 | 0.047151426 | 0.032231444 |
| ko00903_Limonene_and_pinene_degradation                       | Valerat...mol.g.        | 0.163611308  | 0.047691047 | 0.03255293  |
| ko00730_Thiamine_metabolism                                   | Propionat...mol.g.      | -0.163479838 | 0.047872532 | 0.032629381 |
| ko00920_Sulfur_metabolism                                     | Calprotectin...g.g.     | 0.16284      | 0.047990072 | 0.032662091 |
| ko00410_beta<>Alanine_metabolism                              | Chromogranin.A..nmol.g. | -0.162258661 | 0.04880382  | 0.033167859 |
| ko05146_Amoebiasis                                            | Calprotectin...g.g.     | -0.162172007 | 0.048926093 | 0.033202907 |
| ko00640_Propanoate_metabolism                                 | Calprotectin...g.g.     | -0.161058182 | 0.050520538 | 0.034235478 |
| ko00623_Toluene_degradation                                   | Chromogranin.A..nmol.g. | -0.160900073 | 0.050750324 | 0.034341639 |
| ko03013_RNA_transport                                         | Chromogranin.A..nmol.g. | 0.160668706  | 0.051088142 | 0.034470893 |
| ko00340_Histidine_metabolism                                  | Butyrat...mol.g.        | -0.161221101 | 0.051081307 | 0.034470893 |
| ko04626_Plant<>pathogen_interaction                           | Acetat...mol.g.         | -0.161151881 | 0.05118239  | 0.034484938 |
| ko00450_Selenocompound_metabolism                             | Valerat...mol.g.        | 0.160222378  | 0.052555878 | 0.035359616 |
| ko01040_Biosynthesis_of_unsaturated_fatty_acids               | Valerat...mol.g.        | -0.160018362 | 0.052861389 | 0.035514284 |
| ko00730_Thiamine_metabolism                                   | Valerat...mol.g.        | -0.159274081 | 0.053988416 | 0.036219647 |
| ko00380_Tryptophan_metabolism                                 | Beta.Defensin.2..ng.g.  | 0.158440527  | 0.054437871 | 0.036417128 |
| ko00195_Photosynthesis                                        | Caproat...mol.g.        | -0.15898548  | 0.054430738 | 0.036417128 |
| ko05143_African_trypanosomiasis                               | Valerat...mol.g.        | 0.158802333  | 0.054712984 | 0.036549105 |
| ko05100_Bacterial_invasion_of_epithelial_cells                | Acetat...mol.g.         | 0.158724132  | 0.054833866 | 0.036577825 |
| ko00410_beta<>Alanine_metabolism                              | Butyrat...mol.g.        | 0.158261096  | 0.055554148 | 0.03695332  |
| ko00592_alpha<>Linolenic_acid_metabolism                      | Caproat...mol.g.        | -0.158308959 | 0.055479336 | 0.03695332  |
| ko00051_Fructose_and_mannose_metabolism                       | Beta.Defensin.2..ng.g.  | -0.156088099 | 0.0581691   | 0.038637997 |
| ko00400_Phenylalanine_tyrosine_and_tryptophan_biosynthesis    | Acetat...mol.g.         | -0.156221577 | 0.058820205 | 0.038960271 |
| ko00363_Bisphenol_degradation                                 | Butyrat...mol.g.        | -0.156222905 | 0.058818028 | 0.038960271 |
| ko00564_Glycerophospholipid_metabolism                        | Caproat...mol.g.        | -0.15605387  | 0.059095646 | 0.039087582 |
| ko00311_Penicillin_and_cephalosporin_biosynthesis             | Propionat...mol.g.      | 0.15599201   | 0.059197512 | 0.039099889 |
| ko00362_Benzoate_degradation                                  | Beta.Defensin.2..ng.g.  | -0.154910742 | 0.060114045 | 0.039608788 |
| ko00190_Oxidative_phosphorylation                             | Butyrat...mol.g.        | 0.155425763  | 0.060136676 | 0.039608788 |
| ko01040_Biosynthesis_of_unsaturated_fatty_acids               | Chromogranin.A..nmol.g. | -0.154645758 | 0.060559065 | 0.039804232 |
| ko00930_Caprolactam_degradation                               | Calprotectin...g.g.     | -0.154619726 | 0.06060293  | 0.039804232 |
| ko00460_Cyanoamino_acid_metabolism                            | Calprotectin...g.g.     | 0.154232621  | 0.061258284 | 0.040178478 |
| ko04146_Peroxisome                                            | Calprotectin...g.g.     | -0.154126357 | 0.061439198 | 0.040240934 |
| ko00312_beta<>Lactam_resistance                               | Propionat...mol.g.      | 0.154237168  | 0.062147834 | 0.040648378 |
| ko04210_Apoptosis                                             | Acetat...mol.g.         | -0.154005699 | 0.062545826 | 0.040851792 |
| ko00020_Citrate_cycle_[TCA_cycle]                             | Calprotectin...g.g.     | -0.153293466 | 0.062872406 | 0.040930319 |
| ko00190_Oxidative_phosphorylation                             | Acetat...mol.g.         | 0.153784836  | 0.062927525 | 0.040930319 |
| ko00640_Propanoate_metabolism                                 | Valerat...mol.g.        | -0.153797766 | 0.062905127 | 0.040930319 |
| ko00330_Arginine_and_proline_metabolism                       | Butyrat...mol.g.        | -0.153087227 | 0.064145676 | 0.04166494  |
| ko05142_Chagas_disease_[American_trypanosomiasis]             | Chromogranin.A..nmol.g. | -0.151971998 | 0.065202374 | 0.042292807 |
| ko00622_Xylene_degradation                                    | Caproat...mol.g.        | -0.15217719  | 0.065763655 | 0.042598039 |
| ko04122_Sulfur_relay_system                                   | Butyrat...mol.g.        | -0.15133238  | 0.067295313 | 0.04353012  |
| ko00740_Riboflavin_metabolism                                 | Beta.Defensin.2..ng.g.  | 0.150486942  | 0.067904385 | 0.043863681 |
| ko00600_Sphingolipid_metabolism                               | Beta.Defensin.2..ng.g.  | -0.149678071 | 0.069414016 | 0.044475937 |
| ko00791_Atrazine_degradation                                  | Beta.Defensin.2..ng.g.  | 0.149624394  | 0.069515155 | 0.044475937 |
| ko00020_Citrate_cycle_[TCA_cycle]                             | Acetat...mol.g.         | 0.150313093  | 0.069181842 | 0.044475937 |
| ko00513_Various_types_of_N<>glycan_biosynthesis               | Propionat...mol.g.      | -0.150171598 | 0.069447091 | 0.044475937 |
| ko00062_Fatty_acid_elongation_in_mitochondria                 | Propionat...mol.g.      | 0.150149068  | 0.069489403 | 0.044475937 |
| ko05322_Systemic_lupus_erythematosus                          | Propionat...mol.g.      | 0.150149068  | 0.069489403 | 0.044475937 |
| ko03015_mRNA_surveillance_pathway                             | Propionat...mol.g.      | -0.150171598 | 0.069447091 | 0.044475937 |
| ko03060_Protein_export                                        | Calprotectin...g.g.     | -0.148982044 | 0.070734775 | 0.045133273 |
| ko03320_PPAR_signaling_pathway                                | Calprotectin...g.g.     | -0.149018098 | 0.070665863 | 0.045133273 |



|                                                     |                         |              |             |             |
|-----------------------------------------------------|-------------------------|--------------|-------------|-------------|
| ko00830_Retinol_metabolism                          | Beta.Defensin.2..ng.g.  | 0.148798864  | 0.07108574  | 0.045295668 |
| ko00670_One_carbon_pool_by_folate                   | Acetat...mol.g.         | 0.149183361  | 0.071322781 | 0.045385129 |
| ko00281_Geraniol_degradation                        | Chromogranin.A..nmol.g. | -0.148546922 | 0.071570759 | 0.045481298 |
| ko00072_Synthesis_and_degradation_of_ketone_bodies  | Butyrat...mol.g.        | -0.14867272  | 0.072307969 | 0.045887681 |
| ko05012_Parkinson's_disease                         | Caproat...mol.g.        | 0.148215092  | 0.07320022  | 0.046391226 |
| ko00643_Styrene_degradation                         | Butyrat...mol.g.        | -0.148134366 | 0.073358535 | 0.046428902 |
| ko04141_Protein_processing_in_endoplasmic_reticulum | Butyrat...mol.g.        | 0.147864244  | 0.073890298 | 0.046702516 |
| ko00983_Drug_metabolism_<>_other_enzymes            | Butyrat...mol.g.        | 0.147683043  | 0.074248755 | 0.046866002 |
| ko05111_Vibrio_cholerae_pathogenic_cycle            | Caproat...mol.g.        | -0.146903695 | 0.07580655  | 0.047785059 |
| ko02060_Phosphotransferase_system_[PTS]             | Calprotectin...g.g.     | 0.145913673  | 0.076802366 | 0.04834788  |
| ko03320_PPAR_signaling_pathway                      | Propionat...mol.g.      | 0.145510184  | 0.07865767  | 0.049449528 |
| ko00633_Nitrotoluene_degradation                    | Beta.Defensin.2..ng.g.  | -0.144680473 | 0.079356332 | 0.049822058 |
| ko03050_Proteasome                                  | Butyrat...mol.g.        | -0.145051078 | 0.079615691 | 0.049918154 |
