# Supplementary material for: The influence of a short-term gluten-free diet on the human gut microbiome
Source: PubMed Central journal article supplement (PMC4841035; doi:10.1186/s13073-016-0295-y), 2016-04-21
Supplement: 13073_2016_295_MOESM10_ESM.pdf [file 13073_2016_295_MOESM10_ESM.pdf]

| Keg_Module                                                                              | Fecal_Biomarker         | Cor(rho)     | P-val    | Q-val       |
|-----------------------------------------------------------------------------------------|-------------------------|--------------|----------|-------------|
| M00185_Sulfate_transport_system                                                         | Chromogranin.A..nmol.g. | 0.523766952  | 8.44E-12 | 9.60E-10    |
| M00237_Branched<>chain_amino_acid_transport_system                                      | Valerat...mol.g.        | -0.527362217 | 6.76E-12 | 9.60E-10    |
| M00050_Guanine_nucleotide_biosynthesis_IMP_=>_GDP/dGDGPdGTP/dGTP                        | Valerat...mol.g.        | 0.477106299  | 9.99E-10 | 5.54E-08    |
| M00049_Adenine_nucleotide_biosynthesis_IMP_=>_ADP/dADPATP/dATP                          | Valerat...mol.g.        | 0.478934886  | 8.45E-10 | 5.54E-08    |
| M00178_Ribosome_bacteria                                                                | Caproat...mol.g.        | 0.474949109  | 1.22E-09 | 5.54E-08    |
| M00159_V<>type_ATPase_prokaryotes                                                       | Propionat...mol.g.      | -0.467250669 | 2.43E-09 | 9.21E-08    |
| M00003_Gluconeogenesis_oxaloacetate_=>_fructose<>6P                                     | Chromogranin.A..nmol.g. | 0.447217765  | 1.21E-08 | 3.06E-07    |
| M00053_Pyrimidine_deoxyribonucleotide_biosynthesis_CDP/CTP_=>_dCDP/dCTPdTDP/dTTP        | Chromogranin.A..nmol.g. | -0.449218627 | 1.02E-08 | 3.06E-07    |
| M00200_Sorbitol/mannitol_transport_system                                               | Chromogranin.A..nmol.g. | -0.447880221 | 1.14E-08 | 3.06E-07    |
| M00144_Complex_I_[NADH_dehydrogenase]_NADH_dehydrogenase_I                              | Chromogranin.A..nmol.g. | -0.443917328 | 1.59E-08 | 3.30E-07    |
| M00159_V<>type_ATPase_prokaryotes                                                       | Butyrat...mol.g.        | -0.445923712 | 1.51E-08 | 3.30E-07    |
| M00127_Thiamine_biosynthesis_AIR_=>_thiamine<>P/thiamine<>2P                            | Valerat...mol.g.        | 0.442289475  | 2.04E-08 | 3.87E-07    |
| M00016_Lysine_biosynthesis_aspartate_=>_lysine                                          | Chromogranin.A..nmol.g. | -0.435290329 | 3.22E-08 | 5.64E-07    |
| M00061_Uronic_acid_metabolism                                                           | Beta.Defensin.2..ng.g.  | -0.430848509 | 4.60E-08 | 7.48E-07    |
| M00222_Phosphate_transport_system                                                       | Caproat...mol.g.        | -0.428245059 | 6.27E-08 | 9.52E-07    |
| M00133_Polyamine_biosynthesis_arginine_=>_agmatine_=>_putrescine_=>_spermidine          | Chromogranin.A..nmol.g. | -0.422944581 | 8.55E-08 | 1.08E-06    |
| M00159_V<>type_ATPase_prokaryotes                                                       | Acetat...mol.g.         | -0.425001724 | 8.07E-08 | 1.08E-06    |
| M00197_Putative_sugar_transport_system                                                  | Valerat...mol.g.        | -0.425492165 | 7.77E-08 | 1.08E-06    |
| M00061_Uronic_acid_metabolism                                                           | Chromogranin.A..nmol.g. | 0.420980737  | 9.94E-08 | 1.19E-06    |
| M00222_Phosphate_transport_system                                                       | Valerat...mol.g.        | -0.418638193 | 1.31E-07 | 1.50E-06    |
| M00123_Biotin_biosynthesis_pimeloyl<>CoA_=>_biotin                                      | Propionat...mol.g.      | 0.414577086  | 1.79E-07 | 1.93E-06    |
| M00299_Spermidine/putrescine_transport_system                                           | Valerat...mol.g.        | -0.414010604 | 1.86E-07 | 1.93E-06    |
| M00018_Threonine_biosynthesis_apartate_=>_homoserine_=>_threonine                       | Chromogranin.A..nmol.g. | 0.411418799  | 2.05E-07 | 1.95E-06    |
| M00299_Spermidine/putrescine_transport_system                                           | Caproat...mol.g.        | -0.412960025 | 2.01E-07 | 1.95E-06    |
| M00026_Histidine_biosynthesis_PRPP_=>_histidine                                         | Valerat...mol.g.        | -0.409920283 | 2.52E-07 | 2.30E-06    |
| M00194_Maltose/maltodextrin_transport_system                                            | Valerat...mol.g.        | -0.407852346 | 2.94E-07 | 2.57E-06    |
| M00011_Citrate_cycle_second_carbon_oxidation                                            | Chromogranin.A..nmol.g. | -0.405328718 | 3.22E-07 | 2.71E-06    |
| M00237_Branched<>chain_amino_acid_transport_system                                      | Caproat...mol.g.        | -0.398995659 | 5.56E-07 | 4.52E-06    |
| M00009_Citrate_cycle_[TCA_cycle_Krebs_cycle]                                            | Chromogranin.A..nmol.g. | -0.391794522 | 8.47E-07 | 6.57E-06    |
| M00360_Aminoacyl<>tRNA_biosynthesis_prokaryotes                                         | Caproat...mol.g.        | 0.392722279  | 8.65E-07 | 6.57E-06    |
| M00064_ADP<>L<>glycero<>D<>manno<>heptose_biosynthesis                                  | Propionat...mol.g.      | 0.388974154  | 1.12E-06 | 8.06E-06    |
| M00359_Aminoacyl<>tRNA_biosynthesis_eukaryotes                                          | Caproat...mol.g.        | 0.388826697  | 1.13E-06 | 8.06E-06    |
| M00149_Complex_II_[succinate_dehydrogenase/_fumarate_reductase]_succinate_dehydrogenase | Chromogranin.A..nmol.g. | -0.385918599 | 1.27E-06 | 8.77E-06    |
| M00061_Uronic_acid_metabolism                                                           | Caproat...mol.g.        | -0.383305594 | 1.65E-06 | 1.11E-05    |
| M00049_Adenine_nucleotide_biosynthesis_IMP_=>_ADP/dADPATP/dATP                          | Chromogranin.A..nmol.g. | -0.38031751  | 1.86E-06 | 1.21E-05    |
| M00007_Pentose_phosphate_pathway_non<>oxidative_phase_fructose_6P_=>_ribose_5P          | Valerat...mol.g.        | -0.380742788 | 1.96E-06 | 1.24E-05    |
| M00050_Guanine_nucleotide_biosynthesis_IMP_=>_GDP/dGDGPdGTP/dGTP                        | Chromogranin.A..nmol.g. | -0.377829851 | 2.20E-06 | 1.35E-05    |
| M00219_AI<>2_transport_system                                                           | Butyrat...mol.g.        | -0.374752107 | 2.92E-06 | 1.75E-05    |
| M00125_Riboflavin_biosynthesis_GTP_=>_riboflavin/FMN/FAD                                | Butyrat...mol.g.        | 0.373876775  | 3.09E-06 | 1.80E-05    |
| M00064_ADP<>L<>glycero<>D<>manno<>heptose_biosynthesis                                  | Acetat...mol.g.         | 0.371077956  | 3.71E-06 | 2.11E-05    |
| M00157_F<>type_ATPase_bacteria                                                          | Chromogranin.A..nmol.g. | 0.369100834  | 3.91E-06 | 2.12E-05    |
| M00164_ATP_synthase                                                                     | Chromogranin.A..nmol.g. | 0.369100834  | 3.91E-06 | 2.12E-05    |
| M00125_Riboflavin_biosynthesis_GTP_=>_riboflavin/FMN/FAD                                | Propionat...mol.g.      | 0.369096653  | 4.22E-06 | 2.23E-05    |
| M00237_Branched<>chain_amino_acid_transport_system                                      | Propionat...mol.g.      | -0.368769864 | 4.31E-06 | 2.23E-05    |
| M00125_Riboflavin_biosynthesis_GTP_=>_riboflavin/FMN/FAD                                | Acetat...mol.g.         | 0.367454956  | 4.69E-06 | 2.32E-05    |
| M00310_Pyruvateferredoxin_oxidoreductase                                                | Propionat...mol.g.      | -0.36761571  | 4.64E-06 | 2.32E-05    |
| M00026_Histidine_biosynthesis_PRPP_=>_histidine                                         | Propionat...mol.g.      | -0.359198855 | 7.90E-06 | 3.82E-05    |
| M00159_V<>type_ATPase_prokaryotes                                                       | Valerat...mol.g.        | -0.357430193 | 8.82E-06 | 4.18E-05    |
| M00133_Polyamine_biosynthesis_arginine_=>_agmatine_=>_putrescine_=>_spermidine          | Beta.Defensin.2..ng.g.  | 0.355364413  | 9.33E-06 | 4.33E-05    |
| M00123_Biotin_biosynthesis_pimeloyl<>CoA_=>_biotin                                      | Acetat...mol.g.         | 0.354417444  | 1.06E-05 | 4.83E-05    |
| M00299_Spermidine/putrescine_transport_system                                           | Chromogranin.A..nmol.g. | 0.352440553  | 1.12E-05 | 4.99E-05    |
| M00007_Pentose_phosphate_pathway_non<>oxidative_phase_fructose_6P_=>_ribose_5P          | Chromogranin.A..nmol.g. | 0.349506818  | 1.34E-05 | 5.68E-05    |
| M00178_Ribosome_bacteria                                                                | Beta.Defensin.2..ng.g.  | 0.349117415  | 1.37E-05 | 5.68E-05    |
| M00025_Tyrosine_biosynthesis_chorismate_=>_tyrosine                                     | Acetat...mol.g.         | 0.350193759  | 1.37E-05 | 5.68E-05    |
| M00119_Pantothenate_biosynthesis_valine/L<>aspartate_=>_pantothenate                    | Propionat...mol.g.      | 0.350930548  | 1.31E-05 | 5.68E-05    |
| M00311_2<>oxoglutarateferredoxin_oxidoreductase                                         | Caproat...mol.g.        | 0.349095921  | 1.47E-05 | 5.96E-05    |
| M00179_Ribosome_archaea                                                                 | Chromogranin.A..nmol.g. | -0.343193764 | 1.95E-05 | 7.80E-05    |
| M00207_Multiple_sugar_transport_system                                                  | Chromogranin.A..nmol.g. | -0.341695865 | 2.13E-05 | 8.10E-05    |
| M00310_Pyruvateferredoxin_oxidoreductase                                                | Chromogranin.A..nmol.g. | -0.341906872 | 2.11E-05 | 8.10E-05    |
| M00127_Thiamine_biosynthesis_AIR_=>_thiamine<>P/thiamine<>2P                            | Propionat...mol.g.      | 0.342809919  | 2.13E-05 | 8.10E-05    |
| M00061_Uronic_acid_metabolism                                                           | Valerat...mol.g.        | -0.34167941  | 2.28E-05 | 8.51E-05    |
| M00184_RNA_polymerase_archaea                                                           | Chromogranin.A..nmol.g. | -0.339872883 | 2.38E-05 | 8.73E-05    |
| M00197_Putative_sugar_transport_system                                                  | Propionat...mol.g.      | -0.340665952 | 2.42E-05 | 8.74E-05    |
| M00310_Pyruvateferredoxin_oxidoreductase                                                | Acetat...mol.g.         | -0.339660991 | 2.57E-05 | 9.13E-05    |
| M00018_Threonine_biosynthesis_apartate_=>_homoserine_=>_threonine                       | Valerat...mol.g.        | -0.33921044  | 2.64E-05 | 9.23E-05    |
| M00064_ADP<>L<>glycero<>D<>manno<>heptose_biosynthesis                                  | Butyrat...mol.g.        | 0.335207814  | 3.32E-05 | 0.000112472 |
| M00025_Tyrosine_biosynthesis_chorismate_=>_tyrosine                                     | Butyrat...mol.g.        | 0.335005695  | 3.36E-05 | 0.000112472 |
| M00311_2<>oxoglutarateferredoxin_oxidoreductase                                         | Valerat...mol.g.        | 0.335082896  | 3.35E-05 | 0.000112472 |
| M00049_Adenine_nucleotide_biosynthesis_IMP_=>_ADP/dADPATP/dATP                          | Propionat...mol.g.      | 0.331636735  | 4.07E-05 | 0.000134343 |
| M00237_Branched<>chain_amino_acid_transport_system                                      | Beta.Defensin.2..ng.g.  | -0.329884065 | 4.23E-05 | 0.000137611 |
| M00050_Guanine_nucleotide_biosynthesis_IMP_=>_GDP/dGDGPdGTP/dGTP                        | Propionat...mol.g.      | 0.330620475  | 4.31E-05 | 0.000138295 |
| M00049_Adenine_nucleotide_biosynthesis_IMP_=>_ADP/dADPATP/dATP                          | Beta.Defensin.2..ng.g.  | 0.329038175  | 4.44E-05 | 0.000140361 |
| M00133_Polyamine_biosynthesis_arginine_=>_agmatine_=>_putrescine_=>_spermidine          | Caproat...mol.g.        | 0.328640809  | 4.82E-05 | 0.00015038  |
| M00197_Putative_sugar_transport_system                                                  | Beta.Defensin.2..ng.g.  | -0.32471988  | 5.66E-05 | 0.000173544 |
| M00016_Lysine_biosynthesis_aspartate_=>_lysine                                          | Valerat...mol.g.        | 0.325592378  | 5.72E-05 | 0.000173544 |
| M00050_Guanine_nucleotide_biosynthesis_IMP_=>_GDP/dGDGPdGTP/dGTP                        | Beta.Defensin.2..ng.g.  | 0.323524158  | 6.05E-05 | 0.000181147 |
| M00048_Inosine_monophosphate_biosynthesis_PRPP+_glutamine_=>_IMP                        | Valerat...mol.g.        | 0.323469102  | 6.43E-05 | 0.000190122 |
| M00194_Maltose/maltodextrin_transport_system                                            | Propionat...mol.g.      | -0.321814155 | 7.05E-05 | 0.000205568 |

|                                                                                        |                         |              |             |             |
|----------------------------------------------------------------------------------------|-------------------------|--------------|-------------|-------------|
| M00194_Maltose/maltodextrin_transport_system                                           | Beta.Defensin.2..ng.g.  | -0.320434902 | 7.17E-05    | 0.000206689 |
| M00049_Adenine_nucleotide_biosynthesis_IMP_=>_ADP/dADPATP/dATP                         | Caproat...mol.g.        | 0.317857551  | 8.74E-05    | 0.000248622 |
| M00025_Tyrosine_biosynthesis_chorismate_=>_tyrosine                                    | Propionat...mol.g.      | 0.316904754  | 9.20E-05    | 0.000258515 |
| M00050_Guanine_nucleotide_biosynthesis_IMP_=>_GDP/dGDPGTP/dGTP                         | Caproat...mol.g.        | 0.316218798  | 9.55E-05    | 0.000264969 |
| M00178_Ribosome_bacteria                                                               | Chromogranin.A..nmol.g. | -0.311775474 | 0.000114623 | 0.000303329 |
| M00077_Chondroitin_sulfate_degradation                                                 | Calprotectin...g.g.     | -0.311970053 | 0.00011344  | 0.000303329 |
| M00123_Biotin_biosynthesis_pimeloyl<>CoA_=>_biotin                                     | Butyrat...mol.g.        | 0.312940719  | 0.000113757 | 0.000303329 |
| M00123_Biotin_biosynthesis_pimeloyl<>CoA_=>_biotin                                     | Valerat...mol.g.        | 0.312899945  | 0.000114003 | 0.000303329 |
| M00088_Ketone_body_biosynthesis_acetyl<>CoA_=>_acetoacetate/3<>hydroxybutyrate/acetone | Chromogranin.A..nmol.g. | 0.309419793  | 0.000129883 | 0.000339761 |
| M00022_Shikimate_pathway_phosphoenolpyruvate+_erythrose<>4P_=>_chorismate              | Valerat...mol.g.        | -0.309835928 | 0.000134045 | 0.000346665 |
| M00119_Pantothenate_biosynthesis_valine/L<>aspartate_=>_pantothenate                   | Butyrat...mol.g.        | 0.308004858  | 0.000147543 | 0.000377286 |
| M00064_ADP<>L<>glycero<>D<>manno<>heptose_biosynthesis                                 | Valerat...mol.g.        | 0.306720908  | 0.000157752 | 0.000398909 |
| M00246_Nickel_transport_system                                                         | Acetat...mol.g.         | 0.305914059  | 0.0001645   | 0.000410654 |
| M00026_Histidine_biosynthesis_PRPP_=>_histidine                                        | Caproat...mol.g.        | -0.305738252 | 0.000166006 | 0.000410654 |
| M00025_Tyrosine_biosynthesis_chorismate_=>_tyrosine                                    | Valerat...mol.g.        | 0.304382281  | 0.000178056 | 0.000435727 |
| M00185_Sulfate_transport_system                                                        | Caproat...mol.g.        | -0.303063413 | 0.000190553 | 0.000461349 |
| M00007_Pentose_phosphate_pathway_non<>oxidative_phase_fructose_6P_=>_ribose_5P         | Beta.Defensin.2..ng.g.  | -0.297849459 | 0.000236385 | 0.000560388 |
| M00178_Ribosome_bacteria                                                               | Valerat...mol.g.        | 0.29887574   | 0.00023585  | 0.000560388 |
| M00053_Pyrimidine_deoxyribonucleotide_biosynthesis_CDP/CTP_=>_dCDP/dCTPdTDP/dTTP       | Valerat...mol.g.        | 0.298174908  | 0.000244343 | 0.000573284 |
| M00310_Pyruvateferredoxin_oxidoreductase                                               | Butyrat...mol.g.        | -0.297451222 | 0.000253411 | 0.000588491 |
| M00048_Inosine_monophosphate_biosynthesis_PRPP+_glutamine_=>_IMP                       | Caproat...mol.g.        | 0.296060438  | 0.000271719 | 0.000624635 |
| M00219_Al<>2_transport_system                                                          | Propionat...mol.g.      | -0.293621646 | 0.000306815 | 0.000698262 |
| M00222_Phosphate_transport_system                                                      | Chromogranin.A..nmol.g. | 0.291920747  | 0.000318222 | 0.000710207 |
| M00230_Glutamate/aspartate_transport_system                                            | Calprotectin...g.g.     | -0.291915438 | 0.000318305 | 0.000710207 |
| M00077_Chondroitin_sulfate_degradation                                                 | Chromogranin.A..nmol.g. | -0.290033878 | 0.000349332 | 0.000759745 |
| M00245_Cobalt_transport_system                                                         | Chromogranin.A..nmol.g. | 0.289804856  | 0.000353294 | 0.000759745 |
| M00012_Glyoxylate_cycle                                                                | Calprotectin...g.g.     | -0.289772282 | 0.000353861 | 0.000759745 |
| M00053_Pyrimidine_deoxyribonucleotide_biosynthesis_CDP/CTP_=>_dCDP/dCTPdTDP/dTTP       | Caproat...mol.g.        | 0.290764261  | 0.000353261 | 0.000759745 |
| M00239_Peptides/nickel_transport_system                                                | Valerat...mol.g.        | -0.289589239 | 0.000374184 | 0.000795871 |
| M00299_Spermidine/putrescine_transport_system                                          | Beta.Defensin.2..ng.g.  | -0.284342987 | 0.000461031 | 0.00097151  |
| M00219_Al<>2_transport_system                                                          | Acetat...mol.g.         | -0.284731457 | 0.000473437 | 0.0009885   |
| M00126_Tetrahydrofolate_biosynthesis_GTP_=>_THF                                        | Valerat...mol.g.        | 0.280988723  | 0.000565908 | 0.00117083  |
| M00012_Glyoxylate_cycle                                                                | Chromogranin.A..nmol.g. | -0.279620396 | 0.00057785  | 0.001184767 |
| M00311_2<>oxoglutarateferredoxin_oxidoreductase                                        | Beta.Defensin.2..ng.g.  | 0.276687407  | 0.000663543 | 0.001348317 |
| M00246_Nickel_transport_system                                                         | Propionat...mol.g.      | 0.27721774   | 0.000675667 | 0.001360803 |
| M00007_Pentose_phosphate_pathway_non<>oxidative_phase_fructose_6P_=>_ribose_5P         | Propionat...mol.g.      | -0.276868297 | 0.000686771 | 0.001371034 |
| M00016_Lysine_biosynthesis_aspartate_=>_lysine                                         | Caproat...mol.g.        | 0.276505033  | 0.000698492 | 0.001382308 |
| M00125_Riboflavin_biosynthesis_GTP_=>_riboflavin/FMN/FAD                               | Valerat...mol.g.        | 0.276273423  | 0.000706061 | 0.001385241 |
| M00026_Histidine_biosynthesis_PRPP_=>_histidine                                        | Chromogranin.A..nmol.g. | 0.272787597  | 0.000795618 | 0.001521594 |
| M00222_Phosphate_transport_system                                                      | Beta.Defensin.2..ng.g.  | -0.272944088 | 0.000789884 | 0.001521594 |
| M00222_Phosphate_transport_system                                                      | Propionat...mol.g.      | -0.273859446 | 0.000789564 | 0.001521594 |
| M00008_Entner<>Doudoroff_pathway_glucose<>6P_=>_glyceraldehyde<>3P+_pyruvate           | Calprotectin...g.g.     | -0.272079029 | 0.000822063 | 0.001559066 |
| M00127_Thiamine_biosynthesis_AIR_=>_thiamine<>P/thiamine<>2P                           | Butyrat...mol.g.        | 0.272161786  | 0.000853619 | 0.001605535 |
| M00026_Histidine_biosynthesis_PRPP_=>_histidine                                        | Acetat...mol.g.         | -0.271927389 | 0.000862829 | 0.001609555 |
| M00246_Nickel_transport_system                                                         | Butyrat...mol.g.        | 0.27086232   | 0.000905835 | 0.001676042 |
| M00127_Thiamine_biosynthesis_AIR_=>_thiamine<>P/thiamine<>2P                           | Caproat...mol.g.        | 0.269492608  | 0.000964032 | 0.001769337 |
| M00127_Thiamine_biosynthesis_AIR_=>_thiamine<>P/thiamine<>2P                           | Beta.Defensin.2..ng.g.  | 0.266679253  | 0.001051668 | 0.001899543 |
| M00276_PTS_system_mannose<>specific_II_component                                       | Acetat...mol.g.         | -0.267584443 | 0.001050826 | 0.001899543 |
| M00360_Aminoacyl<>tRNA_biosynthesis_prokaryotes                                        | Beta.Defensin.2..ng.g.  | 0.265131849  | 0.001127539 | 0.002020547 |
| M00026_Histidine_biosynthesis_PRPP_=>_histidine                                        | Beta.Defensin.2..ng.g.  | -0.26366428  | 0.00120409  | 0.002091842 |
| M00276_PTS_system_mannose<>specific_II_component                                       | Propionat...mol.g.      | -0.264965975 | 0.001181591 | 0.002091842 |
| M00319_Manganese/zinc/iron_transport_system                                            | Butyrat...mol.g.        | 0.264667913  | 0.001197383 | 0.002091842 |
| M00018_Threonine_biosynthesis_apartate_=>_homoserine_=>_threonine                      | Caproat...mol.g.        | -0.264788045 | 0.001190995 | 0.002091842 |
| M00096_C5_isoprenoid_biosynthesis_non<>mevalonate_pathway                              | Valerat...mol.g.        | 0.263794451  | 0.00124478  | 0.002130011 |
| M00121_Heme_biosynthesis_glutamate_=>_protoheme/siroheme                               | Valerat...mol.g.        | 0.263843565  | 0.00124207  | 0.002130011 |
| M00319_Manganese/zinc/iron_transport_system                                            | Beta.Defensin.2..ng.g.  | 0.260341634  | 0.001395264 | 0.002369696 |
| M00127_Thiamine_biosynthesis_AIR_=>_thiamine<>P/thiamine<>2P                           | Acetat...mol.g.         | 0.259256076  | 0.001519803 | 0.00256209  |
| M00185_Sulfate_transport_system                                                        | Valerat...mol.g.        | -0.259022745 | 0.001535337 | 0.002569246 |
| M00193_Putative_spermidine/putrescine_transport_system                                 | Beta.Defensin.2..ng.g.  | -0.257744658 | 0.001563543 | 0.002597348 |
| M00198_sn<>Glycerol_3<>phosphate_transport_system                                      | Calprotectin...g.g.     | -0.256465176 | 0.001653075 | 0.002726179 |
| M00018_Threonine_biosynthesis_apartate_=>_homoserine_=>_threonine                      | Beta.Defensin.2..ng.g.  | -0.25526807  | 0.001741044 | 0.002850597 |
| M00008_Entner<>Doudoroff_pathway_glucose<>6P_=>_glyceraldehyde<>3P+_pyruvate           | Chromogranin.A..nmol.g. | -0.254651208 | 0.001788018 | 0.002865659 |
| M00051_Uridine_monophosphate_biosynthesis_glutamine_[+_PRPP]_=>_UMP                    | Chromogranin.A..nmol.g. | 0.254885085  | 0.001770074 | 0.002865659 |
| M00359_Aminoacyl<>tRNA_biosynthesis_eukaryotes                                         | Beta.Defensin.2..ng.g.  | 0.254666508  | 0.001786839 | 0.002865659 |
| M00018_Threonine_biosynthesis_apartate_=>_homoserine_=>_threonine                      | Propionat...mol.g.      | -0.252464854 | 0.002035688 | 0.003239785 |
| M00003_Gluconeogenesis_oxaloacetate_=>_fructose<>6P                                    | Calprotectin...g.g.     | 0.25135976   | 0.002058719 | 0.003253686 |
| M00245_Cobalt_transport_system                                                         | Beta.Defensin.2..ng.g.  | -0.25009278  | 0.002172477 | 0.003409794 |
| M00185_Sulfate_transport_system                                                        | Calprotectin...g.g.     | 0.249904324  | 0.002189877 | 0.003413562 |
| M00230_Glutamate/aspartate_transport_system                                            | Acetat...mol.g.         | 0.249674862  | 0.002290281 | 0.003545785 |
| M00119_Pantothenate_biosynthesis_valine/L<>aspartate_=>_pantothenate                   | Acetat...mol.g.         | 0.249104875  | 0.002345716 | 0.003582862 |
| M00121_Heme_biosynthesis_glutamate_=>_protoheme/siroheme                               | Caproat...mol.g.        | 0.249114991  | 0.002344722 | 0.003582862 |
| M00319_Manganese/zinc/iron_transport_system                                            | Propionat...mol.g.      | 0.248095529  | 0.002446872 | 0.003712453 |
| M00003_Gluconeogenesis_oxaloacetate_=>_fructose<>6P                                    | Butyrat...mol.g.        | 0.24721803   | 0.002538008 | 0.003825224 |
| M00246_Nickel_transport_system                                                         | Beta.Defensin.2..ng.g.  | 0.246028981  | 0.00257688  | 0.003858261 |
| M00022_Shikimate_pathway_phosphoenolpyruvate+_erythrose<>4P_=>_chorismate              | Chromogranin.A..nmol.g. | 0.24562855   | 0.002620206 | 0.003897489 |
| M00277_PTS_system_N<>acetylgalactosamine<>specific_II_component                        | Chromogranin.A..nmol.g. | -0.245399034 | 0.002645335 | 0.003909316 |
| M00310_Pyruvateferredoxin_oxidoreductase                                               | Calprotectin...g.g.     | -0.244989616 | 0.002690702 | 0.003940024 |
| M00231-Octopine/nopaline_transport_system                                              | Valerat...mol.g.        | 0.245719772  | 0.002700739 | 0.003940024 |
| M00174_Methane_oxidation_methylotroph_methane_=>_CO2                                   | Valerat...mol.g.        | 0.245543329  | 0.002720511 | 0.00394359  |

|                                                                                          |                         |              |             |             |
|------------------------------------------------------------------------------------------|-------------------------|--------------|-------------|-------------|
| M00335_Sec [secretion] system                                                            | Calprotectin...g.g.     | -0.244091098 | 0.002792744 | 0.004022675 |
| M00117_Ubiquinone_biosynthesis_prokaryotes_chorismate => ubiquinone                      | Calprotectin...g.g.     | -0.243751419 | 0.002832222 | 0.004053882 |
| M00276_PTS_system_mannose<>specific_II_component                                         | Calprotectin...g.g.     | 0.243556951  | 0.00285505  | 0.004061016 |
| M00096_C5_isoprenoid_biosynthesis_non<>mevalonate_pathway                                | Propionat...mol.g.      | 0.243955099  | 0.002904468 | 0.004072895 |
| M00051_Uridine_monophosphate_biosynthesis_glutamine [+ PRPP] => UMP                      | Propionat...mol.g.      | 0.243949433  | 0.002905144 | 0.004072895 |
| M00184_RNA_polymerase_archaea                                                            | Butyrat...mol.g.        | -0.243849483 | 0.002917091 | 0.004072895 |
| M00179_Ribosome_archaea                                                                  | Butyrat...mol.g.        | -0.243433538 | 0.002967285 | 0.004117715 |
| M00349_Microcin_C_transport_system                                                       | Calprotectin...g.g.     | -0.239557109 | 0.00336299  | 0.004638553 |
| M00237_Branched<>chain_amino_acid_transport_system                                       | Chromogranin.A..nmol.g. | 0.239305751  | 0.003397476 | 0.004657891 |
| M00124_Pyridoxal_biosynthesis_erythrose<>4P => pyridoxal<>5P                             | Calprotectin...g.g.     | -0.238885251 | 0.003455882 | 0.004709593 |
| M00200_Sorbitol/mannitol_transport_system                                                | Calprotectin...g.g.     | -0.23833009  | 0.003534377 | 0.004787894 |
| M00121_Heme_biosynthesis_glutamate => protoheme/siroheme                                 | Chromogranin.A..nmol.g. | -0.237780579 | 0.00361365  | 0.004837691 |
| M00016_Lysine_biosynthesis_aspartate => lysine                                           | Calprotectin...g.g.     | -0.237822493 | 0.003607548 | 0.004837691 |
| M00197_Putative_sugar_transport_system                                                   | Caproat...mol.g.        | -0.236619265 | 0.003908459 | 0.005201761 |
| M00026_Histidine_biosynthesis_PRPP => histidine                                          | Butyrat...mol.g.        | -0.236360494 | 0.00394898  | 0.005225134 |
| M00239_Peptides/nickel_transport_system                                                  | Propionat...mol.g.      | -0.234791766 | 0.004202808 | 0.005528845 |
| M00007_Pentose_phosphate_pathway_non<>oxidative_phase_fructose_6P => ribose_5P           | Butyrat...mol.g.        | -0.232639014 | 0.004574963 | 0.005983831 |
| M00260_DNA_polymerase_III_complex_bacteria                                               | Calprotectin...g.g.     | -0.231489857 | 0.004642093 | 0.006036939 |
| M00336_Twin<>arginine_translocation_[Tat]_system                                         | Calprotectin...g.g.     | -0.231222204 | 0.00469116  | 0.006066085 |
| M00232_General_L<>amino_acid_transport_system                                            | Calprotectin...g.g.     | -0.229772329 | 0.004965117 | 0.006384063 |
| M00149_Complex_II [succinate_dehydrogenase / fumarate_reductase] succinate_dehydrogenase | Butyrat...mol.g.        | -0.230078408 | 0.005055898 | 0.006464266 |
| M00232_General_L<>amino_acid_transport_system                                            | Acetat...mol.g.         | 0.229308008  | 0.005209193 | 0.006549872 |
| M00125_Riboflavin_biosynthesis_GTP => riboflavin/FMN/FAD                                 | Caproat...mol.g.        | 0.229533124  | 0.005163975 | 0.006549872 |
| M00239_Peptides/nickel_transport_system                                                  | Caproat...mol.g.        | -0.229410265 | 0.00518861  | 0.006549872 |
| M00207_Multiple_sugar_transport_system                                                   | Propionat...mol.g.      | -0.228920886 | 0.005287781 | 0.006592828 |
| M00193_Putative_spermidine/putrescine_transport_system                                   | Valerat...mol.g.        | -0.228854838 | 0.005301294 | 0.006592828 |
| M00225_Lysine/arginine/ornithine_transport_system                                        | Calprotectin...g.g.     | -0.227089743 | 0.005509995 | 0.006815133 |
| M00115_NAD_biosynthesis_aspartate => NAD                                                 | Acetat...mol.g.         | -0.226845739 | 0.005727389 | 0.007045729 |
| M00149_Complex_II [succinate_dehydrogenase / fumarate_reductase] succinate_dehydrogenase | Calprotectin...g.g.     | -0.224940743 | 0.005984379 | 0.007322292 |
| M00096_C5_isoprenoid_biosynthesis_non<>mevalonate_pathway                                | Butyrat...mol.g.        | 0.225075606  | 0.006127856 | 0.007457751 |
| M00348_Glutathione_transport_system                                                      | Butyrat...mol.g.        | 0.224845152  | 0.006181788 | 0.007483369 |
| M00053_Pyrimidine_deoxyribonucleotide_biosynthesis_CDP/CTP => dCDP/dCTPdTP/dTTP          | Beta.Defensin.2..ng.g.  | 0.223544426  | 0.006311808 | 0.007600338 |
| M00185_Sulfate_transport_system                                                          | Beta.Defensin.2..ng.g.  | -0.222183969 | 0.006646081 | 0.007960731 |
| M00022_Shikimate_pathway_phosphoenolpyruvate + erythrose<>4P => chorismate               | Propionat...mol.g.      | -0.221810849 | 0.006932382 | 0.00826019  |
| M00319_Manganese/zinc/iron_transport_system                                              | Acetat...mol.g.         | 0.221515223  | 0.007009674 | 0.008265734 |
| M00004_Pentose_phosphate_pathway [Pentose_phosphate_cycle]                               | Caproat...mol.g.        | -0.221577518 | 0.006993323 | 0.008265734 |
| M00194_Maltose/maltodextrin_transport_system                                             | Caproat...mol.g.        | -0.221290217 | 0.007069014 | 0.00829274  |
| M00226_Histidine_transport_system                                                        | Calprotectin...g.g.     | -0.220150962 | 0.007174981 | 0.008373887 |
| M00299_Spermidine/putrescine_transport_system                                            | Propionat...mol.g.      | -0.218741293 | 0.00777307  | 0.009025628 |
| M00197_Putative_sugar_transport_system                                                   | Chromogranin.A..nmol.g. | 0.217721978  | 0.007855675 | 0.009075242 |
| M00231-Octopine/nopaline_transport_system                                                | Acetat...mol.g.         | 0.217800819  | 0.008048141 | 0.00925063  |
| M00246_Nickel_transport_system                                                           | Valerat...mol.g.        | 0.217477094  | 0.008144801 | 0.009268115 |
| M00119_Pantothenate_biosynthesis_valine/L<>aspartate => pantothenate                     | Valerat...mol.g.        | 0.217539512  | 0.008126084 | 0.009268115 |
| M00006_Pentose_phosphate_pathway_oxidative_phase_glucose_6P => ribulose_5P               | Caproat...mol.g.        | -0.21719806  | 0.00822894  | 0.009317272 |
| M00174_Methane_oxidation_methylotroph_methane => CO2                                     | Acetat...mol.g.         | 0.216703857  | 0.008379851 | 0.009441171 |
| M00348_Glutathione_transport_system                                                      | Calprotectin...g.g.     | -0.215133244 | 0.008643587 | 0.009560076 |
| M00157_F<>type_ATPase_bacteria                                                           | Acetat...mol.g.         | 0.215967079  | 0.008609383 | 0.009560076 |
| M00348_Glutathione_transport_system                                                      | Acetat...mol.g.         | 0.215740406  | 0.008681111 | 0.009560076 |
| M00164_ATP_synthase                                                                      | Acetat...mol.g.         | 0.215967079  | 0.008609383 | 0.009560076 |
| M00157_F<>type_ATPase_bacteria                                                           | Valerat...mol.g.        | -0.21556358  | 0.008737431 | 0.009560076 |
| M00164_ATP_synthase                                                                      | Valerat...mol.g.        | -0.21556358  | 0.008737431 | 0.009560076 |
| M00133_Polyamine_biosynthesis_arginine => agmatine => putrescine => spermidine           | Acetat...mol.g.         | -0.215166166 | 0.00886519  | 0.009653453 |
| M00095_C5_isoprenoid_biosynthesis_mevalonate_pathway                                     | Chromogranin.A..nmol.g. | -0.214116121 | 0.008971801 | 0.009676941 |
| M00311_2<>oxoglutarateferredoxin_oxidoreductase                                          | Propionat...mol.g.      | 0.214885931  | 0.008956269 | 0.009676941 |
| M00149_Complex_II [succinate_dehydrogenase / fumarate_reductase] succinate_dehydrogenase | Acetat...mol.g.         | -0.214459822 | 0.009096344 | 0.009764993 |
| M00133_Polyamine_biosynthesis_arginine => agmatine => putrescine => spermidine           | Butyrat...mol.g.        | -0.214068618 | 0.009226644 | 0.00985837  |
| M00144_Complex_I [NADH_dehydrogenase] NADH_dehydrogenase_I                               | Calprotectin...g.g.     | -0.213077792 | 0.009318171 | 0.009909639 |
| M00025_Tyrosine_biosynthesis_chorismate => tyrosine                                      | Beta.Defensin.2..ng.g.  | 0.212120287  | 0.00964799  | 0.010132361 |
| M00300_Putrescine_transport_system                                                       | Calprotectin...g.g.     | -0.212082646 | 0.009661164 | 0.010132361 |
| M00245_Cobalt_transport_system                                                           | Valerat...mol.g.        | -0.212832034 | 0.009649426 | 0.010132361 |
| M00200_Sorbitol/mannitol_transport_system                                                | Beta.Defensin.2..ng.g.  | 0.211899296  | 0.009725559 | 0.010153108 |
| M00194_Maltose/maltodextrin_transport_system                                             | Chromogranin.A..nmol.g. | 0.210977165  | 0.010055201 | 0.010449309 |
| M00233_Glutamate_transport_system                                                        | Butyrat...mol.g.        | 0.21146696   | 0.0101359   | 0.010485293 |
| M00230_Glutamate/aspartate_transport_system                                              | Butyrat...mol.g.        | 0.210647807  | 0.010438087 | 0.010749037 |
| M00197_Putative_sugar_transport_system                                                   | Butyrat...mol.g.        | -0.208941973 | 0.011092939 | 0.011371941 |
| M00239_Peptides/nickel_transport_system                                                  | Beta.Defensin.2..ng.g.  | -0.206902424 | 0.011632609 | 0.011866726 |
| M00034_Methionine_salvage_pathway                                                        | Calprotectin...g.g.     | -0.20666227  | 0.011732012 | 0.011866726 |
| M00144_Complex_I [NADH_dehydrogenase] NADH_dehydrogenase_I                               | Acetat...mol.g.         | -0.207426253 | 0.011704834 | 0.011866726 |
| M00194_Maltose/maltodextrin_transport_system                                             | Butyrat...mol.g.        | -0.206660106 | 0.012025253 | 0.012109515 |
| M00011_Citrate_cycle_second_carbon_oxidation                                             | Calprotectin...g.g.     | -0.205463422 | 0.012239463 | 0.012270929 |
| M00276_PTS_system_mannose<>specific_II_component                                         | Valerat...mol.g.        | -0.205748148 | 0.012416663 | 0.012339863 |
| M00319_Manganese/zinc/iron_transport_system                                              | Valerat...mol.g.        | 0.205771666  | 0.012406431 | 0.012339863 |
| M00157_F<>type_ATPase_bacteria                                                           | Butyrat...mol.g.        | 0.205024264  | 0.012735257 | 0.012546907 |
| M00164_ATP_synthase                                                                      | Butyrat...mol.g.        | 0.205024264  | 0.012735257 | 0.012546907 |
| M00125_Riboflavin_biosynthesis_GTP => riboflavin/FMN/FAD                                 | Beta.Defensin.2..ng.g.  | 0.202926557  | 0.013377121 | 0.013041543 |
| M00035_Methionine_degradation                                                            | Calprotectin...g.g.     | -0.202857736 | 0.013409231 | 0.013041543 |
| M00206_Cellobiose_transport_system                                                       | Butyrat...mol.g.        | 0.203717324  | 0.013328628 | 0.013041543 |
| M00009_Citrate_cycle [TCA_cycle_Krebs_cycle]                                             | Calprotectin...g.g.     | -0.20218114  | 0.013728523 | 0.013295262 |
| M00202_Oligogalacturonide_transport_system                                               | Calprotectin...g.g.     | -0.201728221 | 0.013945955 | 0.01333559  |

|                                                                                         |                         |              |             |             |
|-----------------------------------------------------------------------------------------|-------------------------|--------------|-------------|-------------|
| M00276_PTS_system_mannose<>specific_II_component                                        | Butyrat...mol.g.        | -0.202468497 | 0.013918067 | 0.01333559  |
| M00001_Glycolysis_[Embden<>Meyerhof_pathway]_glucose=>_pyruvate                         | Butyrat...mol.g.        | -0.202485497 | 0.013909893 | 0.01333559  |
| M00197_Putative_sugar_transport_system                                                  | Acetat...mol.g.         | -0.20183209  | 0.014227115 | 0.013443381 |
| M00231_Octopine/nopaline_transport_system                                               | Propionat...mol.g.      | 0.201965043  | 0.014162061 | 0.013443381 |
| M00159_V<>type_ATPase_prokaryotes                                                       | Caproat...mol.g.        | -0.201814198 | 0.014235889 | 0.013443381 |
| M00174_Methane_oxidation_methylotroph_methane=>_CO2                                     | Propionat...mol.g.      | 0.201550803  | 0.01436561  | 0.013509823 |
| M00095_C5_isoprenoid_biosynthesis_mevalonate_pathway                                    | Calprotectin...g.g.     | -0.199946489 | 0.014830769 | 0.013782546 |
| M00245_Cobalt_transport_system                                                          | Calprotectin...g.g.     | 0.199933706  | 0.01483729  | 0.013782546 |
| M00003_Gluconeogenesis_oxaloacetate=>_fructose<>6P                                      | Propionat...mol.g.      | 0.200822641  | 0.014729609 | 0.013782546 |
| M00231_Octopine/nopaline_transport_system                                               | Butyrat...mol.g.        | 0.199553043  | 0.015383528 | 0.014231864 |
| M00174_Methane_oxidation_methylotroph_methane=>_CO2                                     | Butyrat...mol.g.        | 0.199154144  | 0.01559414  | 0.014368301 |
| M00018_Threonine_biosynthesis_apartate=>_homoserine=>_threonine                         | Calprotectin...g.g.     | 0.197745807  | 0.015990905 | 0.014674466 |
| M00019_Leucine_biosynthesis_pyruvate=>_2<>oxoisovalerate=>_leucine                      | Calprotectin...g.g.     | -0.197481912 | 0.016135191 | 0.014747408 |
| M00136_GABA_biosynthesis_prokaryotes_putrescine=>_GABA                                  | Calprotectin...g.g.     | -0.197153396 | 0.016316389 | 0.014853369 |
| M00126_Tetrahydrofolate_biosynthesis_GTP=>_THF                                          | Propionat...mol.g.      | 0.197621045  | 0.01642713  | 0.014894602 |
| M00287_PTS_system_galactosamine<>specific_II_component                                  | Calprotectin...g.g.     | -0.196614237 | 0.016617606 | 0.015007517 |
| M00003_Gluconeogenesis_oxaloacetate=>_fructose<>6P                                      | Acetat...mol.g.         | 0.196888716  | 0.016838502 | 0.015128642 |
| M00002_Glycolysis_core_module_involving_three<>carbon_compounds                         | Acetat...mol.g.         | -0.196807491 | 0.016884676 | 0.015128642 |
| M00007_Pentose_phosphate_pathway_non<>oxidative_phase_fructose_6P=>_ribose_5P           | Acetat...mol.g.         | -0.19657515  | 0.01701736  | 0.015187733 |
| M00002_Glycolysis_core_module_involving_three<>carbon_compounds                         | Caproat...mol.g.        | 0.196327117  | 0.017160004 | 0.015255216 |
| M00133_Polyamine_biosynthesis_arginine=>_agmatine=>_putrescine=>_spermidine             | Valerat...mol.g.        | 0.195770259  | 0.017484041 | 0.015482804 |
| M00185_Sulfate_transport_system                                                         | Butyrat...mol.g.        | 0.19543211   | 0.01768339  | 0.015598641 |
| M00194_Maltose/maltodextrin_transport_system                                            | Acetat...mol.g.         | -0.195060215 | 0.017904907 | 0.015733062 |
| M00095_C5_isoprenoid_biosynthesis_mevalonate_pathway                                    | Beta.Defensin.2..ng.g.  | -0.193422377 | 0.018501708 | 0.016194943 |
| M00319_Manganese/zinc/iron_transport_system                                             | Calprotectin...g.g.     | 0.192994142  | 0.018768058 | 0.016365142 |
| M00157_F<>type_ATPase_bacteria                                                          | Calprotectin...g.g.     | 0.192343424  | 0.019179137 | 0.016471158 |
| M00164_ATP_synthase                                                                     | Calprotectin...g.g.     | 0.192343424  | 0.019179137 | 0.016471158 |
| M00049_Adenine_nucleotide_biosynthesis_IMP=>_ADP/dADPATP/dATP                           | Acetat...mol.g.         | 0.193250604  | 0.019017455 | 0.016471158 |
| M00232_General_L<>amino_acid_transport_system                                           | Butyrat...mol.g.        | 0.193065192  | 0.019134754 | 0.016471158 |
| M00009_Citrate_cycle_[TCA_cycle_Krebs_cycle]                                            | Butyrat...mol.g.        | -0.192488728 | 0.019503457 | 0.016686717 |
| M00144_Complex_I_[NADH_dehydrogenase]_NADH_dehydrogenase_I                              | Butyrat...mol.g.        | -0.191645728 | 0.020053686 | 0.017093221 |
| M00022_Shikimate_pathway_phosphoenolpyruvate+_erythrose<>4P=>_chorismate                | Acetat...mol.g.         | -0.190470074 | 0.020843397 | 0.017700056 |
| M00002_Glycolysis_core_module_involving_three<>carbon_compounds                         | Butyrat...mol.g.        | -0.189262757 | 0.021682151 | 0.018327327 |
| M00200_Sorbitol/mannitol_transport_system                                               | Caproat...mol.g.        | 0.189176569  | 0.021743124 | 0.018327327 |
| M00051_Uridine_monophosphate_biosynthesis_glutamine_[+_PRPP]_=>_UMP                     | Acetat...mol.g.         | 0.189040141  | 0.021839942 | 0.018341005 |
| M00117_Ubiquinone_biosynthesis_prokaryotes_chorismate=>_ubiquinone                      | Chromogranin.A..nmol.g. | -0.188113382 | 0.022046034 | 0.018435151 |
| M00001_Glycolysis_[Embden<>Meyerhof_pathway]_glucose=>_pyruvate                         | Acetat...mol.g.         | -0.188656685 | 0.022114055 | 0.018435151 |
| M00077_Chondroitin_sulfate_degradation                                                  | Caproat...mol.g.        | 0.188340577  | 0.022342247 | 0.018557404 |
| M00050_Guanine_nucleotide_biosynthesis_IMP=>_GDP/dGDPGTP/dGTP                           | Acetat...mol.g.         | 0.187783991  | 0.02274896  | 0.018826509 |
| M00360_Aminoacyl<>tRNA_biosynthesis_prokaryotes                                         | Valerat...mol.g.        | 0.183342291  | 0.026228792 | 0.021627691 |
| M00200_Sorbitol/mannitol_transport_system                                               | Acetat...mol.g.         | -0.182821453 | 0.026665211 | 0.021908175 |
| M00126_Tetrahydrofolate_biosynthesis_GTP=>_THF                                          | Caproat...mol.g.        | 0.182002851  | 0.027363672 | 0.022401161 |
| M00157_F<>type_ATPase_bacteria                                                          | Caproat...mol.g.        | -0.181459263 | 0.027836062 | 0.02262511  |
| M00164_ATP_synthase                                                                     | Caproat...mol.g.        | -0.181459263 | 0.027836062 | 0.02262511  |
| M00324_Dipeptide_transport_system                                                       | Calprotectin...g.g.     | -0.179963105 | 0.028619823 | 0.023179367 |
| M00237_Branched<>chain_amino_acid_transport_system                                      | Butyrat...mol.g.        | -0.179534597 | 0.029564971 | 0.023859937 |
| M00331_Type_II_general_secretion_system                                                 | Valerat...mol.g.        | 0.178051129  | 0.030959172 | 0.024896818 |
| M00049_Adenine_nucleotide_biosynthesis_IMP=>_ADP/dADPATP/dATP                           | Calprotectin...g.g.     | -0.177303282 | 0.031098583 | 0.024920871 |
| M00022_Shikimate_pathway_phosphoenolpyruvate+_erythrose<>4P=>_chorismate                | Butyrat...mol.g.        | -0.177734416 | 0.031263954 | 0.024965484 |
| M00126_Tetrahydrofolate_biosynthesis_GTP=>_THF                                          | Beta.Defensin.2..ng.g.  | 0.17661529   | 0.031768652 | 0.025191721 |
| M00050_Guanine_nucleotide_biosynthesis_IMP=>_GDP/dGDPGTP/dGTP                           | Calprotectin...g.g.     | -0.176622054 | 0.031762005 | 0.025191721 |
| M00060_Lipopolysaccharide_biosynthesis_KDO2<>lipid_A                                    | Calprotectin...g.g.     | -0.175985333 | 0.032392903 | 0.02544974  |
| M00207_Multiple_sugar_transport_system                                                  | Acetat...mol.g.         | -0.176650538 | 0.03232635  | 0.02544974  |
| M00115_NAD_biosynthesis_aspartate=>_NAD                                                 | Butyrat...mol.g.        | -0.176465199 | 0.032511046 | 0.02544974  |
| M00200_Sorbitol/mannitol_transport_system                                               | Butyrat...mol.g.        | -0.176434888 | 0.032541337 | 0.02544974  |
| M00009_Citrate_cycle_[TCA_cycle_Krebs_cycle]                                            | Acetat...mol.g.         | -0.174963355 | 0.034040937 | 0.026531365 |
| M00150_Complex_II_[succinate_dehydrogenase/_fumarate_reductase]_fumarate_reductase      | Calprotectin...g.g.     | -0.17386642  | 0.034569488 | 0.026851359 |
| M00207_Multiple_sugar_transport_system                                                  | Calprotectin...g.g.     | -0.17336013  | 0.035107478 | 0.027176483 |
| M00149_Complex_II_[succinate_dehydrogenase/_fumarate_reductase]_succinate_dehydrogenase | Propionat...mol.g.      | -0.173316662 | 0.035787941 | 0.027609316 |
| M00004_Pentose_phosphate_pathway_[Pentose_phosphate_cycle]                              | Beta.Defensin.2..ng.g.  | -0.172435654 | 0.036108097 | 0.027741914 |
| M00342_Bacterial_proteasome                                                             | Valerat...mol.g.        | 0.172823622  | 0.036325511 | 0.027741914 |
| M00011_Citrate_cycle_second_carbon_oxidation                                            | Caproat...mol.g.        | 0.172850248  | 0.036296307 | 0.027741914 |
| M00179_Ribosome_archaea                                                                 | Acetat...mol.g.         | -0.172523789 | 0.036655741 | 0.027900486 |
| M00184_RNA_polymerase_archaea                                                           | Acetat...mol.g.         | -0.172369822 | 0.036826299 | 0.027936871 |
| M00049_Adenine_nucleotide_biosynthesis_IMP=>_ADP/dADPATP/dATP                           | Butyrat...mol.g.        | 0.172258312  | 0.036950243 | 0.02793777  |
| M00185_Sulfate_transport_system                                                         | Acetat...mol.g.         | 0.171688275  | 0.037589342 | 0.028233391 |
| M00035_Methionine_degradation                                                           | Valerat...mol.g.        | 0.171755517  | 0.037513472 | 0.028233391 |
| M00277_PTS_system_N<>acetylgalactosamine<>specific_II_component                         | Valerat...mol.g.        | 0.171515036  | 0.037785405 | 0.028287296 |
| M00064_ADP<>L<>glycero<>D<>manno<>heptose_biosynthesis                                  | Beta.Defensin.2..ng.g.  | 0.1705051    | 0.038275407 | 0.028560179 |
| M00359_Aminoacyl<>tRNA_biosynthesis_eukaryotes                                          | Valerat...mol.g.        | 0.170496845  | 0.038955215 | 0.028972443 |
| M00001_Glycolysis_[Embden<>Meyerhof_pathway]_glucose=>_pyruvate                         | Valerat...mol.g.        | -0.170355167 | 0.039120377 | 0.029000508 |
| M00077_Chondroitin_sulfate_degradation                                                  | Beta.Defensin.2..ng.g.  | 0.169166909  | 0.039841097 | 0.029438895 |
| M00230_Glutamate/aspartate_transport_system                                             | Propionat...mol.g.      | 0.168524002  | 0.041308572 | 0.030424444 |
| M00317_Manganese/iron_transport_system                                                  | Calprotectin...g.g.     | -0.166962938 | 0.042536858 | 0.031228035 |
| M00016_Lysine_biosynthesis_aspartate=>_lysine                                           | Acetat...mol.g.         | -0.166909239 | 0.043322419 | 0.031702481 |
| M00050_Guanine_nucleotide_biosynthesis_IMP=>_GDP/dGDPGTP/dGTP                           | Butyrat...mol.g.        | 0.166678315  | 0.043617015 | 0.031815759 |
| M00012_Glyoxylate_cycle                                                                 | Valerat...mol.g.        | 0.166372832  | 0.044009299 | 0.031999343 |
| M00233_Glutamate_transport_system                                                       | Acetat...mol.g.         | 0.166031422  | 0.044451202 | 0.03221772  |
| M00144_Complex_I_[NADH_dehydrogenase]_NADH_dehydrogenase_I                              | Beta.Defensin.2..ng.g.  | 0.165329826  | 0.044631445 | 0.032245665 |

|                                                                                        |                         |              |             |             |
|----------------------------------------------------------------------------------------|-------------------------|--------------|-------------|-------------|
| M00002_Glycolysis_core_module_involving_three<>carbon_compounds                        | Beta.Defensin.2..ng.g.  | 0.163958246  | 0.046456489 | 0.033458021 |
| M00006_Pentose_phosphate_pathway_oxidative_phase_glucose_6P_=>_ribose_5P               | Beta.Defensin.2..ng.g.  | -0.162669976 | 0.048226893 | 0.034623499 |
| M00011_Citrate_cycle_second_carbon_oxidation                                           | Butyrat...mol.g.        | -0.162566027 | 0.049149909 | 0.035175198 |
| M00159_V<>type_ATPase_prokaryotes                                                      | Beta.Defensin.2..ng.g.  | -0.161572356 | 0.049779221 | 0.035513899 |
| M00051_Uridine_monophosphate_biosynthesis_glutamine_[+_PRPP]_=>_UMP                    | Butyrat...mol.g.        | 0.16171601   | 0.050363399 | 0.035818385 |
| M00232_General_L<>amino_acid_transport_system                                          | Caproat...mol.g.        | -0.161420745 | 0.050790692 | 0.036009745 |
| M00179_Ribosome_archaea                                                                | Calprotectin...g.g.     | -0.160123699 | 0.051891275 | 0.036562237 |
| M00229_Arginine_transport_system                                                       | Calprotectin...g.g.     | -0.160161234 | 0.051835629 | 0.036562237 |
| M00053_Pyrimidine_deoxyribonucleotide_biosynthesis_CDP/CTP_=>_dCDP/dCTPdTDP/dTTP       | Calprotectin...g.g.     | -0.1597944   | 0.052381582 | 0.036793792 |
| M00219_AI<>2_transport_system                                                          | Caproat...mol.g.        | 0.16022042   | 0.052558802 | 0.03680468  |
| M00246_Nickel_transport_system                                                         | Caproat...mol.g.        | 0.15939679   | 0.053801249 | 0.037559145 |
| M00198_sn<>Glycerol_3<>phosphate_transport_system                                      | Chromogranin.A..nmol.g. | -0.158657824 | 0.054103416 | 0.037654586 |
| M00207_Multiple_sugar_transport_system                                                 | Butyrat...mol.g.        | -0.157424286 | 0.056875645 | 0.039463303 |
| M00335_Sec_[secretion]_system                                                          | Chromogranin.A..nmol.g. | -0.156469436 | 0.057550353 | 0.039527043 |
| M00184_RNA_polymerase_archaea                                                          | Calprotectin...g.g.     | -0.15645655  | 0.057571173 | 0.039527043 |
| M00193_Putative_spermidine/putrescine_transport_system                                 | Acetat...mol.g.         | -0.157249164 | 0.057155448 | 0.039527043 |
| M00184_RNA_polymerase_archaea                                                          | Propionat...mol.g.      | -0.156933768 | 0.057662234 | 0.039527043 |
| M00206_Cellobiose_transport_system                                                     | Acetat...mol.g.         | 0.156405624  | 0.058519142 | 0.039993983 |
| M00127_Thiamine_biosynthesis_AIR_=>_thiamine<>P/thiamine<>2P                           | Chromogranin.A..nmol.g. | -0.155421301 | 0.059264168 | 0.040141524 |
| M00331_Type_II_general_secretion_system                                                | Calprotectin...g.g.     | -0.15547398  | 0.059177042 | 0.040141524 |
| M00179_Ribosome_archaea                                                                | Propionat...mol.g.      | -0.156155884 | 0.058927974 | 0.040141524 |
| M00121_Heme_biosynthesis_glutamate_=>_protoheme/siroheme                               | Beta.Defensin.2..ng.g.  | 0.154770069  | 0.06034996  | 0.040649342 |
| M00001_Glycolysis_[Embden<>Meyerhof_pathway]_glucose_=>_pyruvate                       | Propionat...mol.g.      | -0.15528554  | 0.060371126 | 0.040649342 |
| M00016_Lysine_biosynthesis_aspartate_=>_lysine                                         | Beta.Defensin.2..ng.g.  | 0.154546102  | 0.060727127 | 0.040768429 |
| M00360_Aminoacyl<>tRNA_biosynthesis_prokaryotes                                        | Chromogranin.A..nmol.g. | -0.154116391 | 0.061456189 | 0.041136529 |
| M00342_Bacterial_proteasome                                                            | Chromogranin.A..nmol.g. | -0.153551414 | 0.062425642 | 0.041662908 |
| M00317_Manganese/iron_transport_system                                                 | Beta.Defensin.2..ng.g.  | -0.153250607 | 0.06294689  | 0.041887951 |
| M00096_C5_isoprenoid_biosynthesis_non<>mevalonate_pathway                              | Beta.Defensin.2..ng.g.  | 0.153035717  | 0.063321432 | 0.04201434  |
| M00324_Dipeptide_transport_system                                                      | Beta.Defensin.2..ng.g.  | -0.152786521 | 0.06375805  | 0.042127479 |
| M00009_Citrate_cycle_[TCA_cycle_Krebs_cycle]                                           | Caproat...mol.g.        | 0.153248615  | 0.063862163 | 0.042127479 |
| M00025_Tyrosine_biosynthesis_chorismate_=>_tyrosine                                    | Caproat...mol.g.        | 0.152999401  | 0.064300391 | 0.042293971 |
| M00230_Glutamate/aspartate_transport_system                                            | Valerat...mol.g.        | 0.152705456  | 0.064820431 | 0.04251316  |
| M00088_Ketone_body_biosynthesis_acetyl<>CoA_=>_acetoacetate/3<>hydroxybutyrate/acetone | Acetat...mol.g.         | 0.15177949   | 0.066481112 | 0.04347704  |
| M00051_Uridine_monophosphate_biosynthesis_glutamine_[+_PRPP]_=>_UMP                    | Calprotectin...g.g.     | 0.150868229  | 0.067202097 | 0.04382262  |
| M00124_Pyridoxal_biosynthesis_erythrose<>4P_=>_pyridoxal<>5P                           | Chromogranin.A..nmol.g. | -0.150570662 | 0.067749672 | 0.043894265 |
| M00028_Ornithine_biosynthesis_glutamate_=>_ornithine                                   | Calprotectin...g.g.     | -0.150494408 | 0.067890577 | 0.043894265 |
| M00193_Putative_spermidine/putrescine_transport_system                                 | Propionat...mol.g.      | -0.151092054 | 0.067736298 | 0.043894265 |
| M00119_Pantothenate_biosynthesis_valine/L<>aspartate_=>_pantothenate                   | Chromogranin.A..nmol.g. | 0.15014243   | 0.068544064 | 0.04419123  |
| M00219_AI<>2_transport_system                                                          | Chromogranin.A..nmol.g. | -0.149888578 | 0.069018537 | 0.04437143  |
| M00348_Glutathione_transport_system                                                    | Propionat...mol.g.      | 0.149271098  | 0.071154609 | 0.0454877   |
| M00232_General_L<>amino_acid_transport_system                                          | Propionat...mol.g.      | 0.149347012  | 0.07100936  | 0.0454877   |
| M00220_Rhamnose_transport_system                                                       | Beta.Defensin.2..ng.g.  | -0.148337139 | 0.07197666  | 0.045567701 |
| M00019_Leucine_biosynthesis_pyruvate_=>_2<>oxoisovalerate_=>_leucine                   | Beta.Defensin.2..ng.g.  | -0.14818829  | 0.072265794 | 0.045567701 |
| M00123_Biotin_biosynthesis_pimeloyl<>CoA_=>_biotin                                     | Beta.Defensin.2..ng.g.  | 0.148321316  | 0.072007351 | 0.045567701 |
| M00200_Sorbitol/mannitol_transport_system                                              | Propionat...mol.g.      | -0.14868669  | 0.07228087  | 0.045567701 |
| M00028_Ornithine_biosynthesis_glutamate_=>_ornithine                                   | Valerat...mol.g.        | 0.148993947  | 0.071686943 | 0.045567701 |
| M00007_Pentose_phosphate_pathway_non<>oxidative_phase_fructose_6P_=>_ribose_5P         | Caproat...mol.g.        | -0.148015098 | 0.073592943 | 0.046266702 |
| M00260_DNA_polymerase_III_complex_bacteria                                             | Chromogranin.A..nmol.g. | -0.146735798 | 0.07513688  | 0.047008291 |
| M00115_NAD_biosynthesis_aspartate_=>_NAD                                               | Propionat...mol.g.      | -0.147119715 | 0.075372139 | 0.047008291 |
| M00348_Glutathione_transport_system                                                    | Caproat...mol.g.        | -0.14710972  | 0.075392194 | 0.047008291 |
| M00034_Methionine_salvage_pathway                                                      | Valerat...mol.g.        | 0.146957601  | 0.075697957 | 0.04706998  |
| M00349_Microcin_C_transport_system                                                     | Chromogranin.A..nmol.g. | -0.14629535  | 0.076025486 | 0.047144831 |
| M00117_Ubiquinone_biosynthesis_prokaryotes_chorismate_=>_ubiquinone                    | Valerat...mol.g.        | 0.144909732  | 0.079912522 | 0.049420594 |
| M00336_Twin<>arginine_translocation_[Tat]_system                                       | Chromogranin.A..nmol.g. | -0.143881645 | 0.081046879 | 0.049851188 |
| M00144_Complex_I_[NADH_dehydrogenase]_NADH_dehydrogenase_I                             | Caproat...mol.g.        | 0.14447122   | 0.080839076 | 0.049851188 |
